# Supplementary material for: Physical Frailty and Functional Status in Patients With Advanced Chronic Kidney Disease: A Systematic Review
Source: PubMed Central journal article supplement — Can J Kidney Health Dis. 2023 Jun 22;10:20543581231181026. doi: 10.1177/20543581231181026 (PMC10291542; doi:10.1177/20543581231181026), 2023-06-22
Supplement: sj-pdf-1-cjk-10.1177_20543581231181026.pdf [file sj-pdf-1-cjk-10.1177_20543581231181026.pdf]

## **Supplementary Material**

### **TABLE OF CONTENTS**

**Supplemental Figure 1.** Forest plot of the association between sarcopenia examined as a continuous variable and mortality<sup>§</sup>

**Supplemental Figure 2.** Forest plot of the association between physical activity and fatigue as a categorical variable and mortality<sup>§</sup>

**Supplemental Figure 3.** Forest plot of the association between physical activity and fatigue as a continuous variable and mortality<sup>§</sup>

**Supplemental Figure 4.** Forest plot of the association between ADL impairment as a categorical variable and mortality<sup>§</sup>

**Supplemental Figure 5.** Forest plot of the association between ADL impairment as a continuous variable and mortality<sup>§</sup>

**Supplemental Figure 6.** Forest plot of the association between performance scale as a categorical variable and mortality<sup>§</sup>

**Supplemental Figure 7.** Forest plot of the association between performance scale as a continuous variable and mortality<sup>§</sup>

**Supplemental Figure 8.** Forest plot of the association between physical performance as a categorical variable and mortality<sup>§</sup>

**Supplemental Figure 9.** Forest plot of the association between physical performance as a continuous variable and mortality<sup>§</sup>

**Supplemental Figure 10.** Forest plot of the association between frailty as a categorical or continuous variable and hospitalization<sup>§</sup>

**Supplemental Figure 11.** Forest plot of the association between sarcopenia as a categorical variable and hospitalization<sup>§</sup>

**Supplemental Figure 12.** Forest plot of the association between gait speed as a categorical and continuous variable and hospitalization<sup>§</sup>

**Supplemental Figure 13.** Forest plot of the association between strength measurement as a categorical and continuous variable and hospitalization<sup>§</sup>

**Supplemental Figure 14.** Forest plot of the association between physical activity and fatigue as a categorical and continuous variable and hospitalization

**Supplemental Figure 15.** Forest plot of the association between ADL impairment as a categorical variable and hospitalization<sup>§</sup>

**Supplemental Figure 16.** Forest plot of the association between performance scale as a continuous variable and hospitalization

**Supplemental Figure 17.** Forest plot of the association between physical performance as a categorical or continuous variable and hospitalization

**Supplemental Item 1.** MEDLINE Search strategy

**Supplemental Item 2.** References for the included studies

**Supplemental Table 1.** Description of included studies, grouped by population studied

**Supplemental Table 2.** Description of frailty and functional status instruments

**Supplemental Table 3.** Overview of the association between frailty and functional status instruments and clinical adverse outcomes, classified by patient population

**Supplemental Table 4.** Quality assessment of included studies based on the modified version of the QUIPS tool

**Figure S1.** Forest plot of the association between sarcopenia examined as a continuous variable and mortality<sup>§</sup>

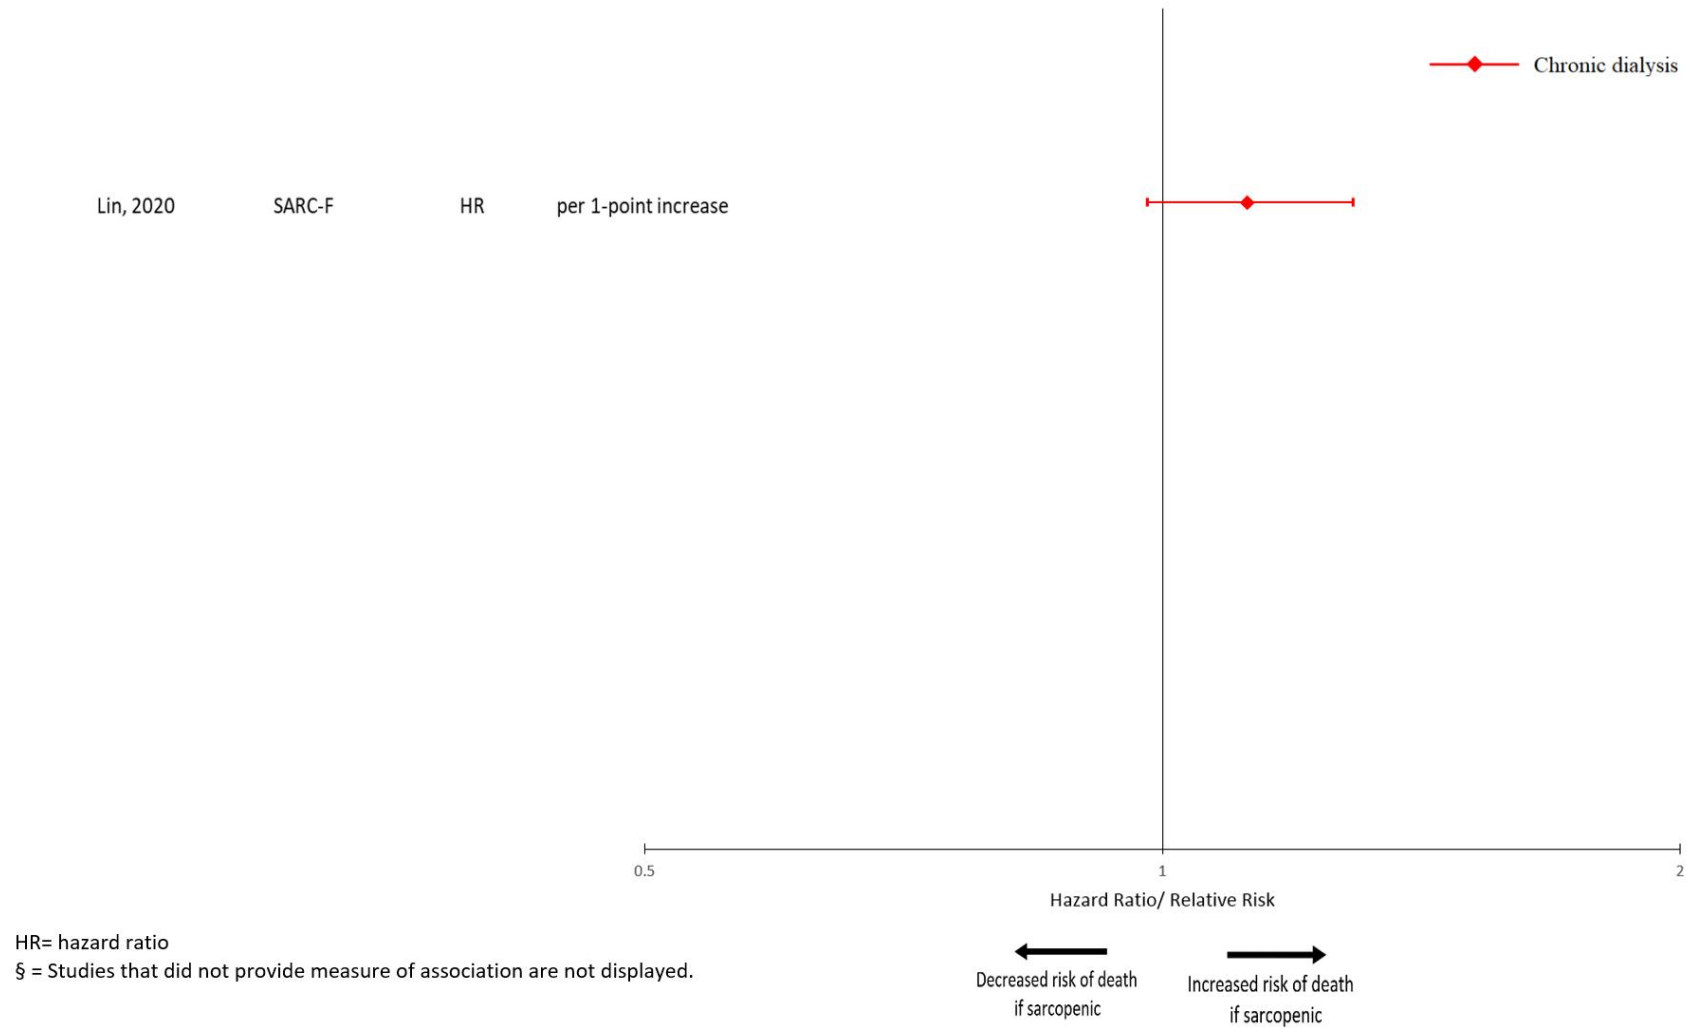

**Figure S2.** Forest plot of the association between physical activity and fatigue as a categorical variable and mortality<sup>§</sup>

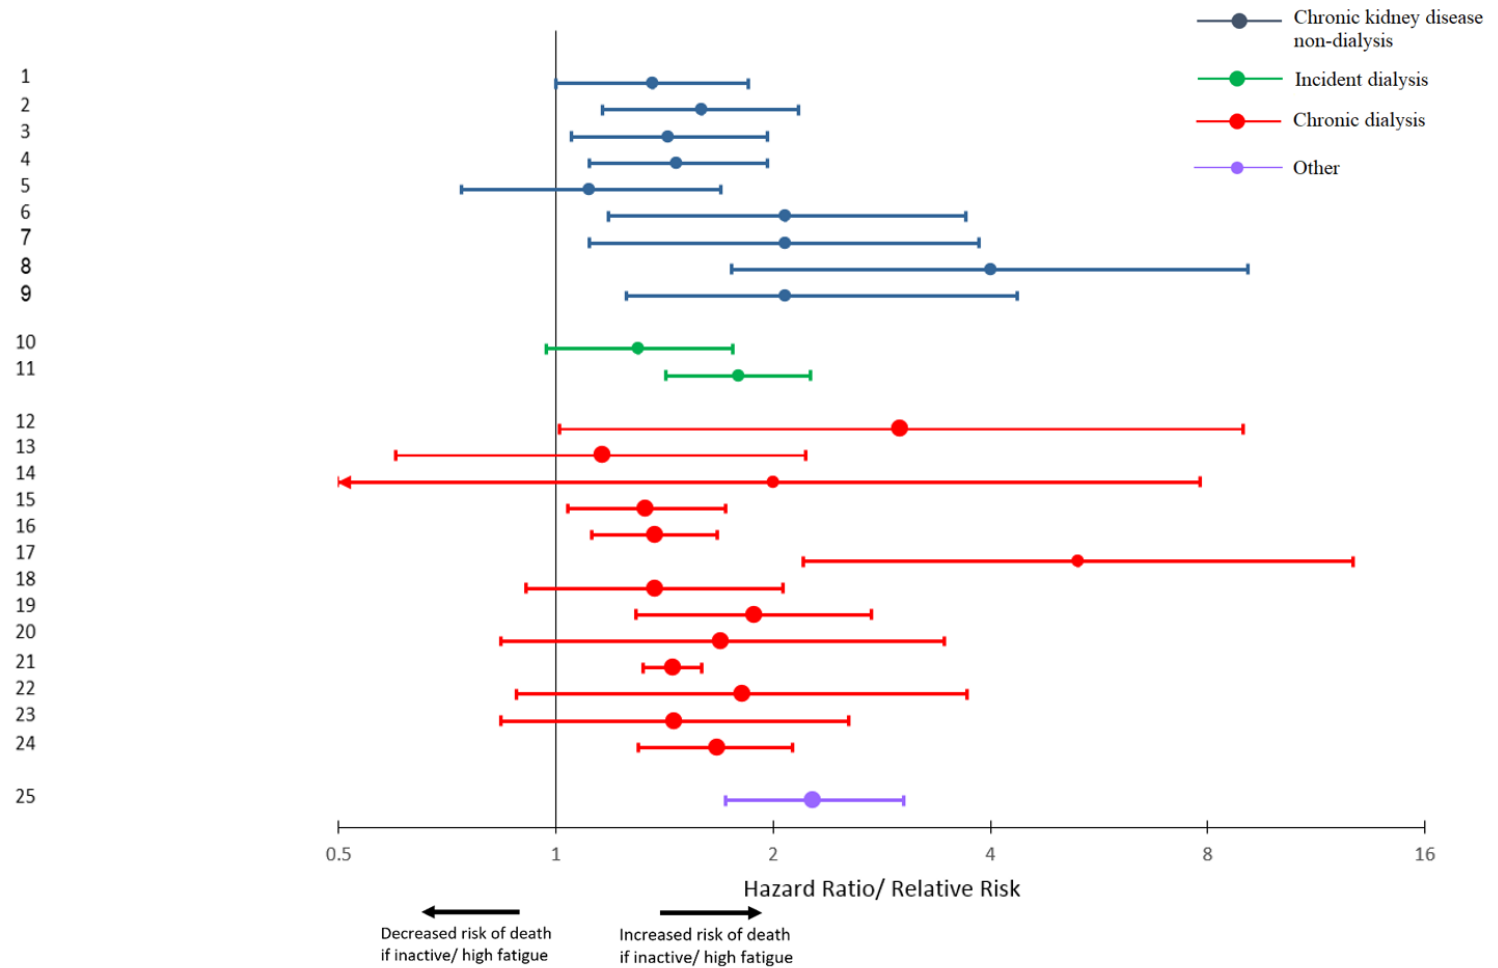

Note: Full legend provided on following page

§ = Studies that did not provide measure of association are not displayed.

Legend: The association between physical activity and fatigue as a categorical variable and mortality

|    |                   |                                                                 |             |                                                 |
|----|-------------------|-----------------------------------------------------------------|-------------|-------------------------------------------------|
| 1  | Navaneethan, 2014 | LTPA                                                            | HR          | <450 MET/week vs. ≥450 MET/week                 |
| 2  | Androga, 2017     | LTPA                                                            | HR¥         | 0 MET-min/week vs. >2000 MET-min/week           |
| 3  | Androga, 2017     | LTPA                                                            | HR¥         | 0 MET-min/week vs. 500-2000 MET-min/week        |
| 4  | Androga, 2017     | LTPA                                                            | HR¥         | 0 MET-min/week vs. <500 MET-min/week            |
| 5  | Rampersad, 2021   | PASE                                                            | HR¥         | Low activity vs. Light activity                 |
| 6  | Rampersad, 2021   | PASE                                                            | HR¥         | Low activity vs. Moderate to high activity      |
| 7  | Clarke, 2019      | Walking                                                         | HR¥         | 0 walking hours/week vs. <1 walking hour/week   |
| 8  | Clarke, 2019      | Walking                                                         | HR¥         | 0 walking hours/week vs. 1-3 walking hours/week |
| 9  | Clarke, 2019      | Walking                                                         | HR¥         | 0 walking hours/week vs. ≥3 walking hours/week  |
| 10 | Johansen, 2007    | SF-36 Vitality Scale                                            | HR          | Score <55 vs. ≥55                               |
| 11 | Johansen, 2007    | Physical Activity                                               | HR          | Inactive vs. active                             |
| 12 | Valenzuela, 2019  | 30-Second Chair Stand                                           | RR, unadj.  | Less repetitions vs. More repetitions           |
| 13 | Brar, 2019        | Center for Epidemiologic Studies Depression Scale – Exhaustion  | HR          | Exhaustion vs. No exhaustion                    |
| 14 | Ducharlet, 2019   | Palliative Care Outcome Scale Symptoms (POS-S) Renal – Weakness | HR, unadj.  | Weakness/low energy vs. No weakness/low energy  |
| 15 | Jhamb, 2009       | SF-36 Vitality Scale                                            | HR¥         | Score ≤55 vs. >55                               |
| 16 | Jhamb, 2011       | SF-36 Vitality Scale                                            | HR          | Lowest vs. highest quartile of vitality         |
| 17 | Bossola, 2015     | SF-36 Vitality Scale                                            | HR          | Low vs. high fatigue                            |
| 18 | van Loon, 2017    | SF-36 Vitality Scale                                            | HR          | Score ≤66 vs. >66                               |
| 19 | Kalantar, 2019    | SF-36 Vitality Scale                                            | HR          | Lowest vs. highest quartile of vitality         |
| 20 | Kurita, 2019      | SF-12 Vitality Scale                                            | HR¥         | Energy none of the time vs. all the time        |
| 21 | Tentori, 2010     | Exercise Frequency                                              | HR¥         | Inactive vs. very active                        |
| 22 | Brar, 2019        | PASE                                                            | HR          | Low vs. normal physical activity                |
| 23 | Kang, 2017        | Physical Activity-WHO Recommendations                           | RR*, unadj. | Inactive vs. active                             |
| 24 | Lopes, 2014       | Rapid Assessment of Physical Activity                           | HR¥         | Inactive vs. very active                        |
| 25 | Beddhu, 2009      | LTPA                                                            | HR¥         | Inactive vs active                              |

HR = hazard ratio

RR\* = relative risk calculated from event data

¥ = comparison was inverted

Unadj; unadjusted model

**Figure S3.** Forest plot of the association between physical activity and fatigue as a continuous variable and mortality<sup>§</sup>

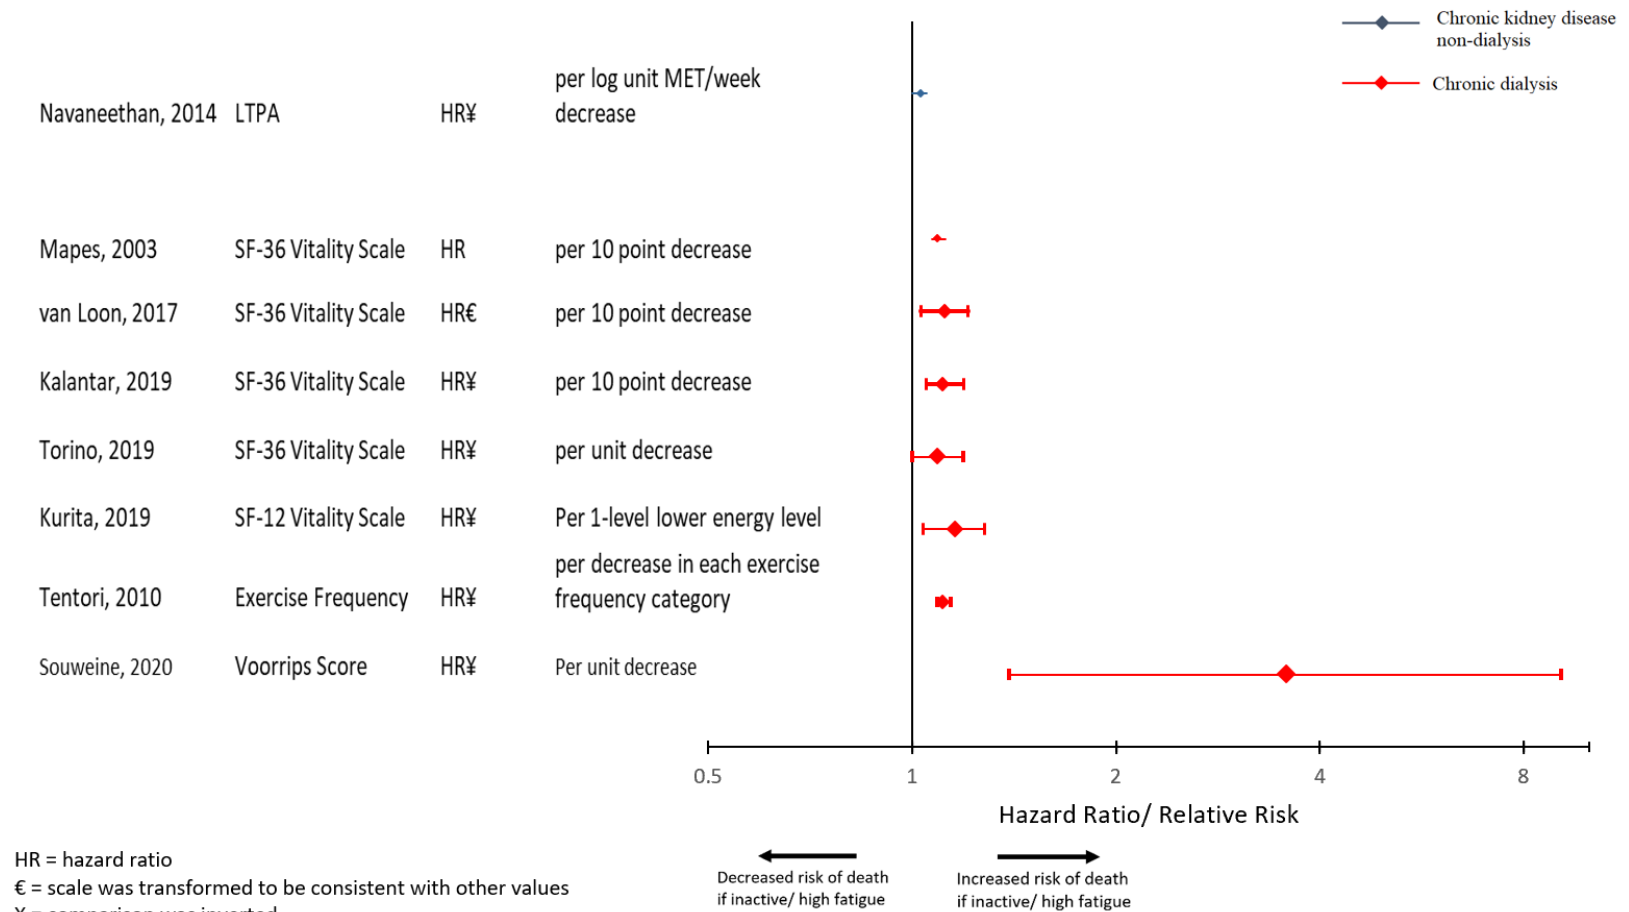

**Figure S4.** Forest plot of the association between ADL impairment as a categorical variable and mortality<sup>§</sup>

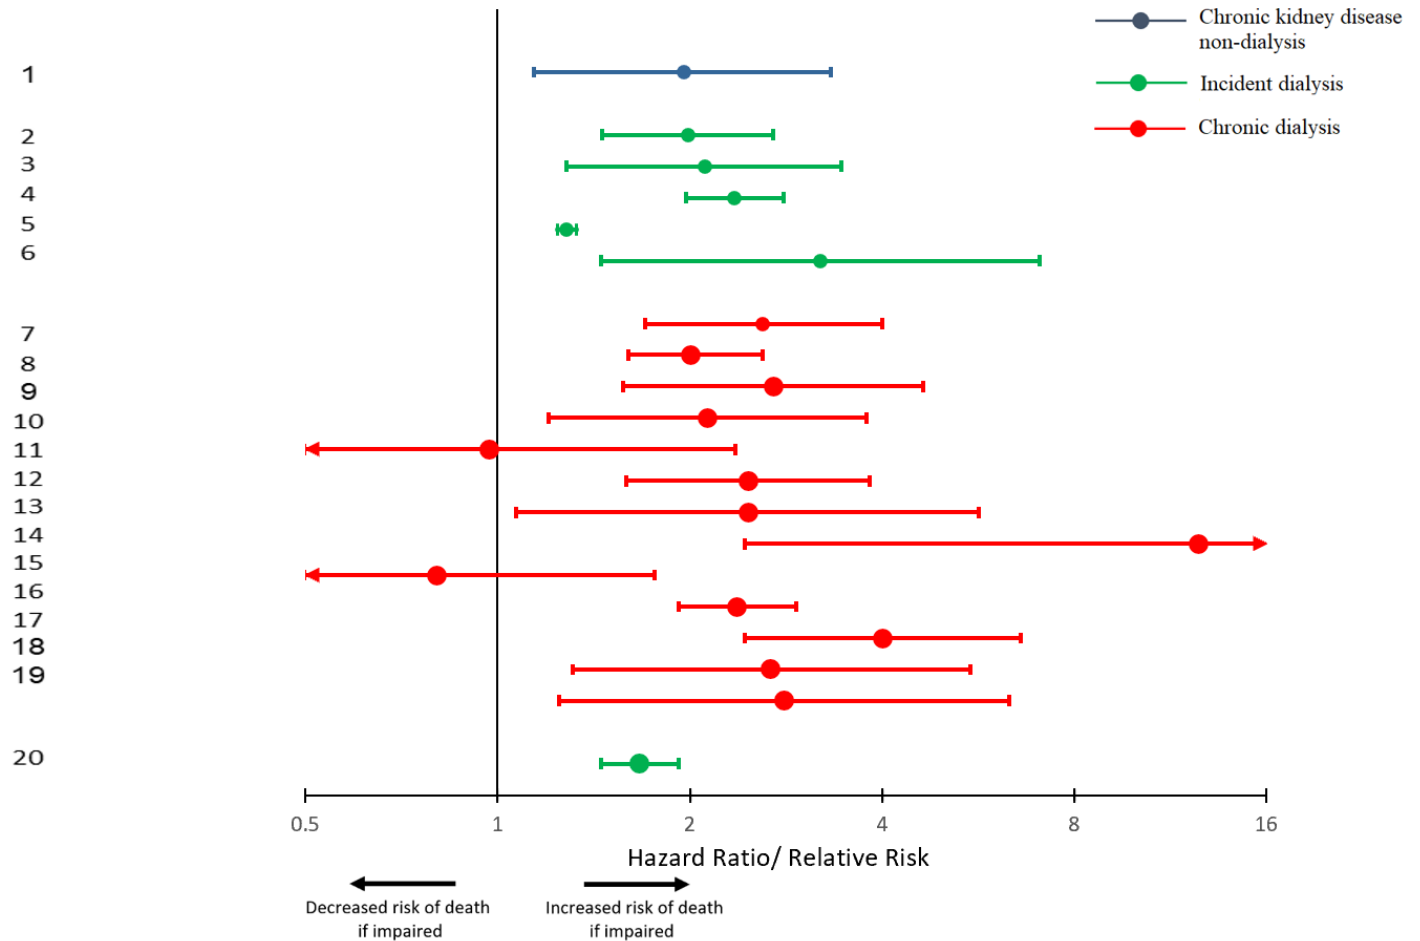

Note: Full legend provided on following page

§ = Studies that did not provide measure of association are not displayed.

Legend: The association between ADL impairment as a categorical variable and mortality

|    |                  |                                            |            |                                                 |
|----|------------------|--------------------------------------------|------------|-------------------------------------------------|
| 1  | Clarke, 2019     | DASI                                       | HR¥        | ≤19.2 summed METs vs.>19.2 summed METs          |
| 2  | Inaguma, 2016    | Barthel Index                              | HR         | Low vs. High BI                                 |
| 3  | Shum, 2014       | Basic Activities of Daily Living           | HR, unadj. | Impaired vs. Independent                        |
| 4  | Yazawa, 2016     | Functional status - ability to perform ADL | RR         | Severe vs. Mild disability/none                 |
| 5  | Shah, 2018       | Functional status- form CMS 2728           | HR         | Poor vs. good functional status                 |
| 6  | van Loon, 2019   | Katz' ADL                                  | HR         | Impaired vs. Not impaired                       |
| 7  | Anderson, 1990   | Activity of Daily Living Score             | HR         | Score <9.6 vs. ≥ 9.6                            |
| 8  | Anderson, 1993   | Activity of Daily Living Score             | HR         | Score ≤8 vs. >8                                 |
| 9  | Watanabe, 2021   | ADL Difficulty                             | HR         | Lower vs. Higher ADL                            |
| 10 | Kang, 2017       | Disability                                 | HR         | Disability vs. no disability (HD patients)      |
| 11 | Kang, 2017       | Disability                                 | HR         | Disability vs. no disability (PD patients)      |
| 12 | Lee, 2017        | Disability                                 | HR, unadj. | Disability vs. no disability                    |
| 13 | Bossola, 2016    | Katz' ADL                                  | HR         | Impaired vs. not impaired                       |
| 14 | Farrokhi, 2013   | 4-Item Essential ADL Score                 | HR         | Severe vs. no disability                        |
| 15 | Bossola, 2016    | Lawton and Brody's IADL scale              | HR         | Impaired vs. not impaired                       |
| 16 | Jassal, 2016     | Functional Status Score (ADL & IADL)       | HR         | Impaired vs. not impaired                       |
| 17 | Tennankore, 2019 | Functional Status Score (ADL & IADL)       | HR         | Score <8 vs. Score 13                           |
| 18 | Matsuzawa, 2019  | Functional Status Score (ADL & IADL)       | HR         | Decline vs. No decline                          |
| 19 | Matsuzawa, 2019  | Functional Status Score (ADL & IADL)       | HR         | Decline in at least 1/3 of tasks vs. No decline |
| 20 | Wetmore, 2019    | Functional Status Score                    | OR         | Score ≥ 7 vs. Score ≤ 0                         |

HR = hazard ratio

RR = relative risk

OR= odds ratio

¥ = comparison was inverted

Unadj; unadjusted model



**Figure S5.** Forest plot of the association between ADL impairment as a continuous variable and mortality<sup>§</sup>

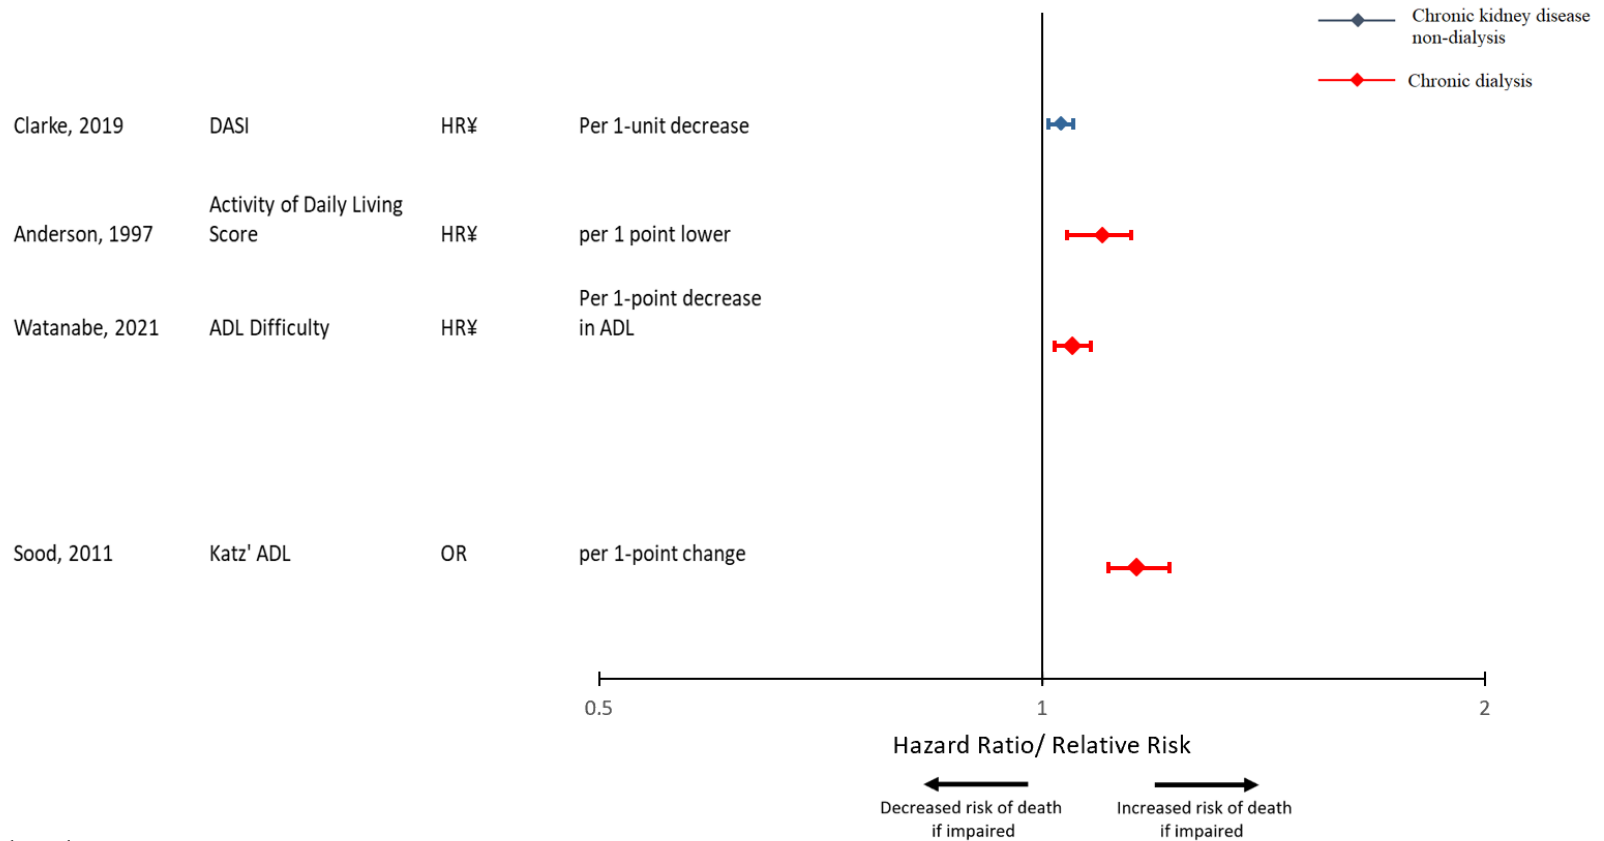

HR = hazard ratio  
 OR = odds ratio  
 ¥ = comparison was inverted  
 § = Studies that did not provide measure of association are not displayed.

**Figure S6.** Forest plot of the association between performance scale as a categorical variable and mortality<sup>§</sup>

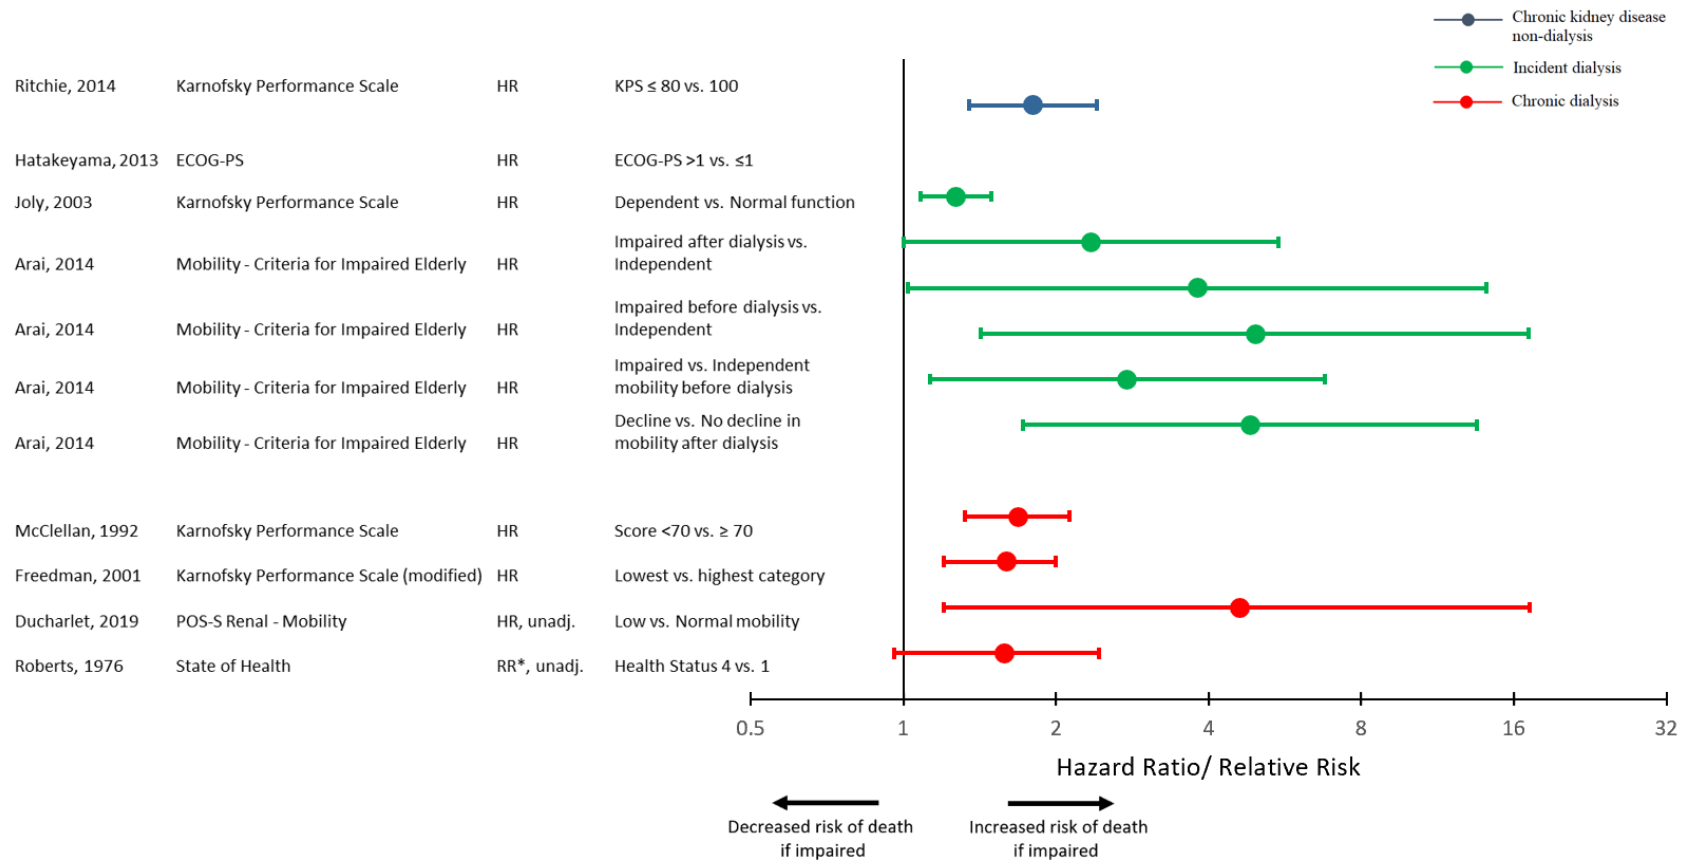

HR = hazard ratio

RR\* = relative risk calculated from event data

Unadj; unadjusted model

§ = Studies that did not provide measure of association are not displayed.

**Figure S7.** Forest plot of the association between performance scale as a continuous variable and mortality<sup>§</sup>

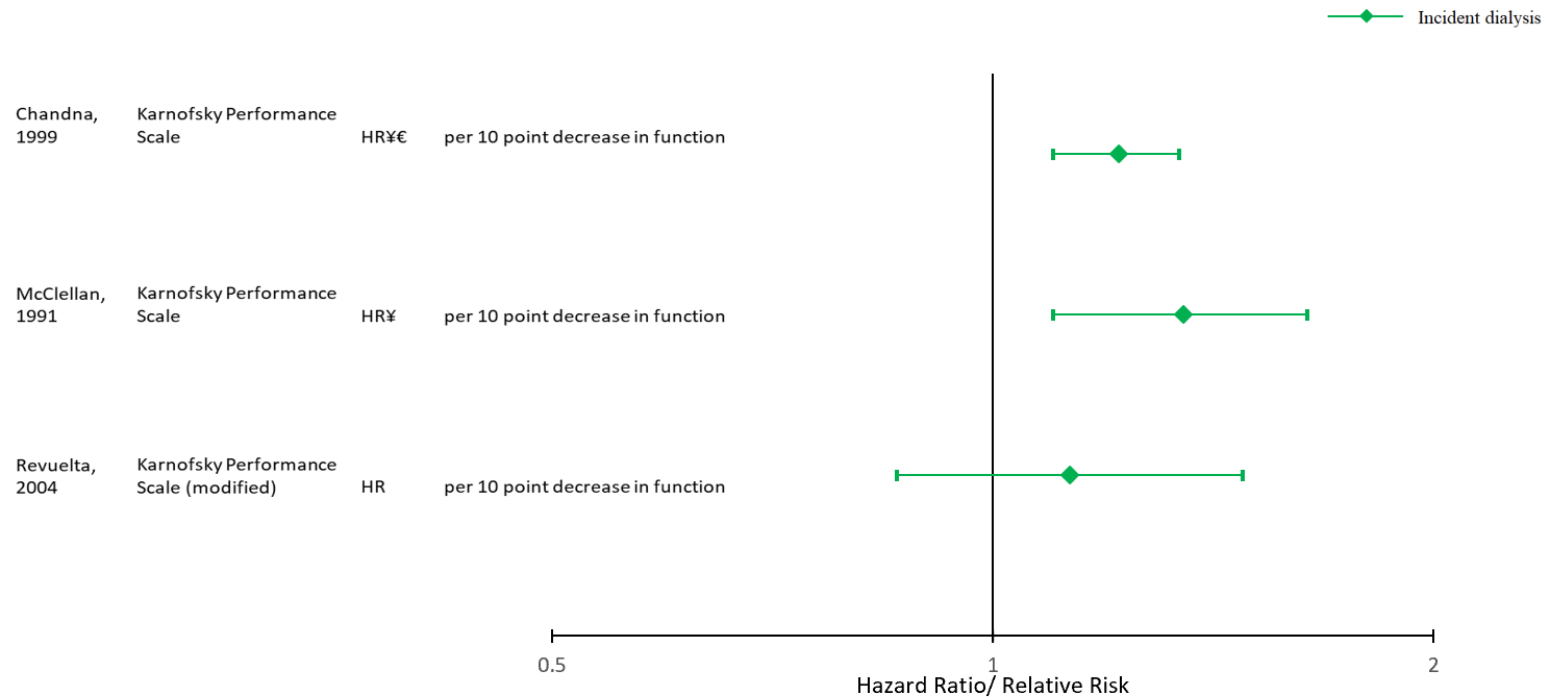

HR = hazard ratio  
 $\times$  = comparison was inverted  
 $\times$  = scale was transformed to be consistent with other values  
 $\S$  = Studies that did not provide measure of association are not displayed.

← Decreased risk of death if impaired  
 → Increased risk of death if impaired

**Figure S8.** Forest plot of the association between physical performance as a categorical variable and mortality<sup>§</sup>

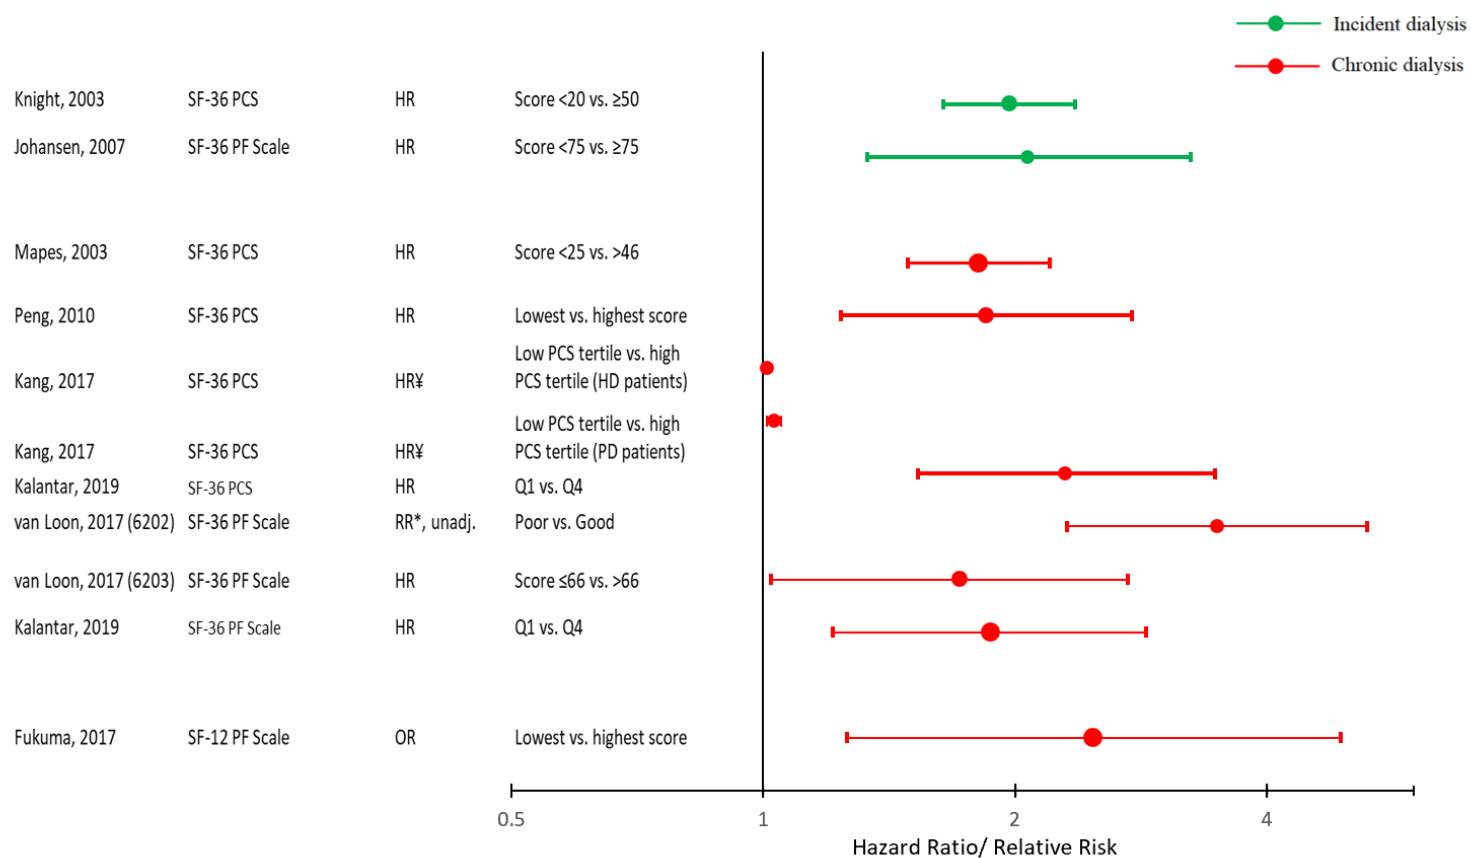

HR = hazard ratio

RR\* = relative risk calculated from event data

OR = odds ratio

<sup>‡</sup> = comparison was inverted

<sup>§</sup> = Studies that did not provide measure of association are not displayed.

**Figure S9.** Forest plot of the association between physical performance as a continuous variable and mortality<sup>§</sup>

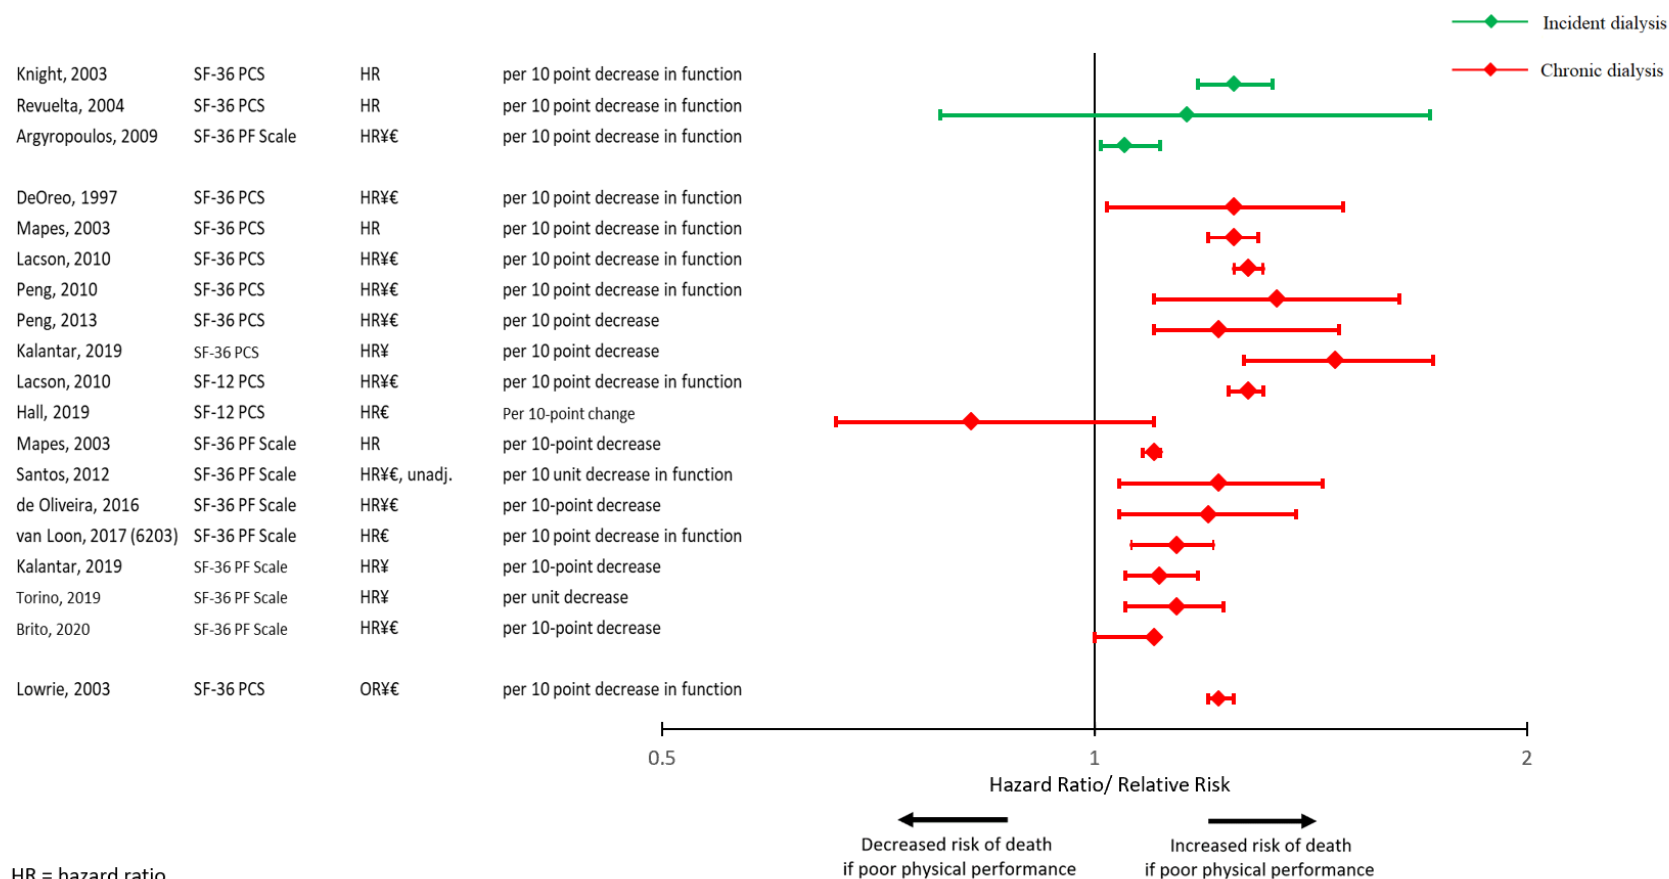

HR = hazard ratio  
 OR = odds ratio  
 ¥ = comparison was inverted  
 € = scale was transformed to be consistent with other values  
 Unadj; unadjusted model  
 § = Studies that did not provide measure of association are not displayed.

**Figure S10.** Forest plot of the association between frailty as a categorical or continuous variable and hospitalization<sup>§</sup>

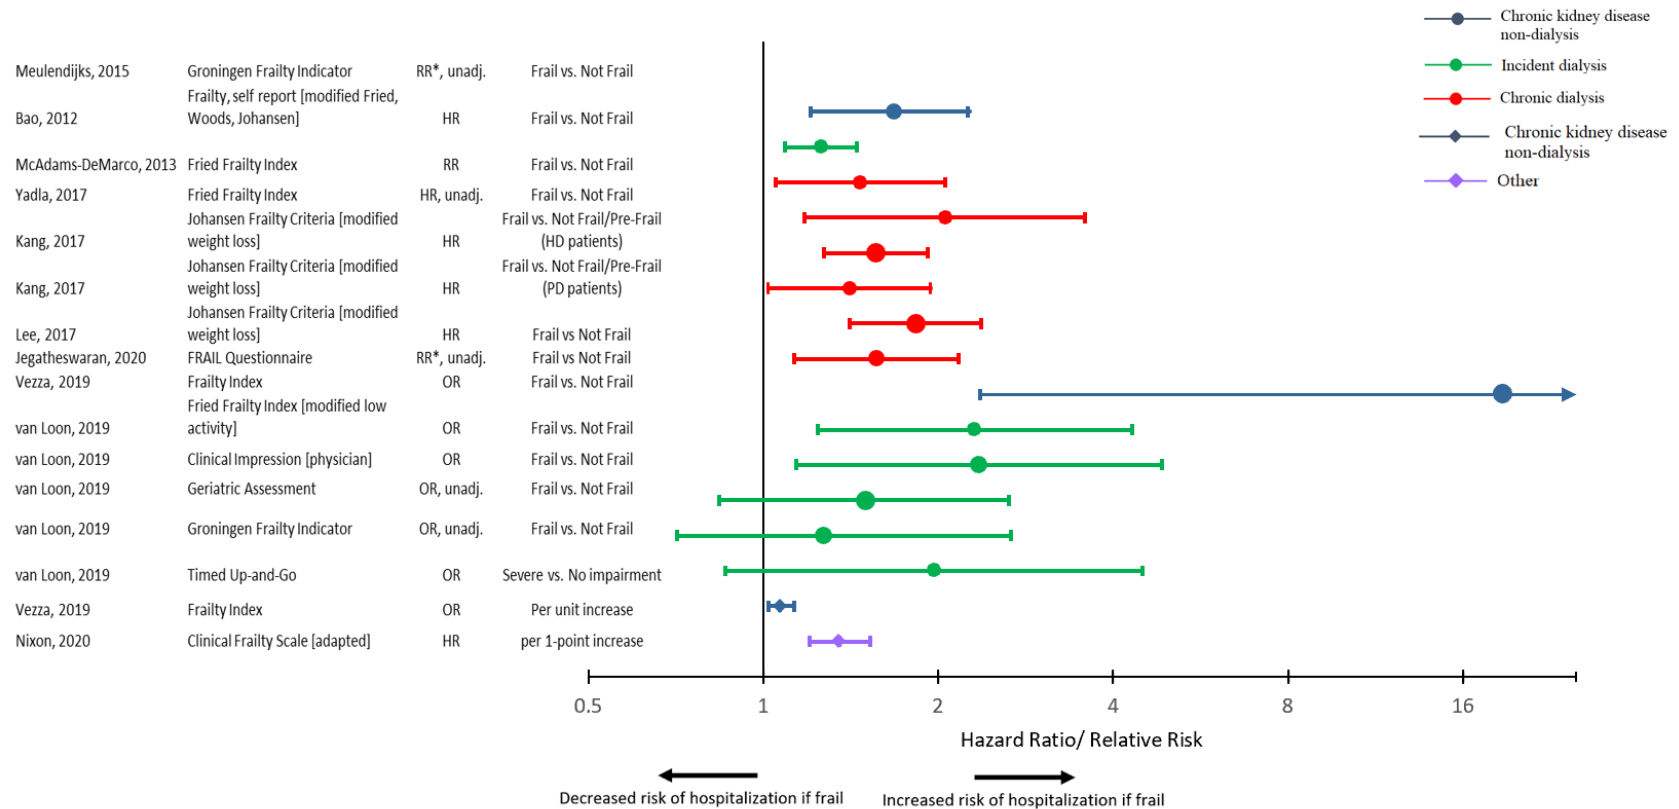

HR = hazard ratio

RR = relative risk

RR\* = relative risk calculated from event data

OR= odds ratio

Unadj.; unadjusted model

• = categorical scale

◆ = continuous scale

§ = Studies that did not provide measure of association are not displayed.

**Figure S11.** Forest plot of the association between sarcopenia as a categorical variable and hospitalization<sup>§</sup>

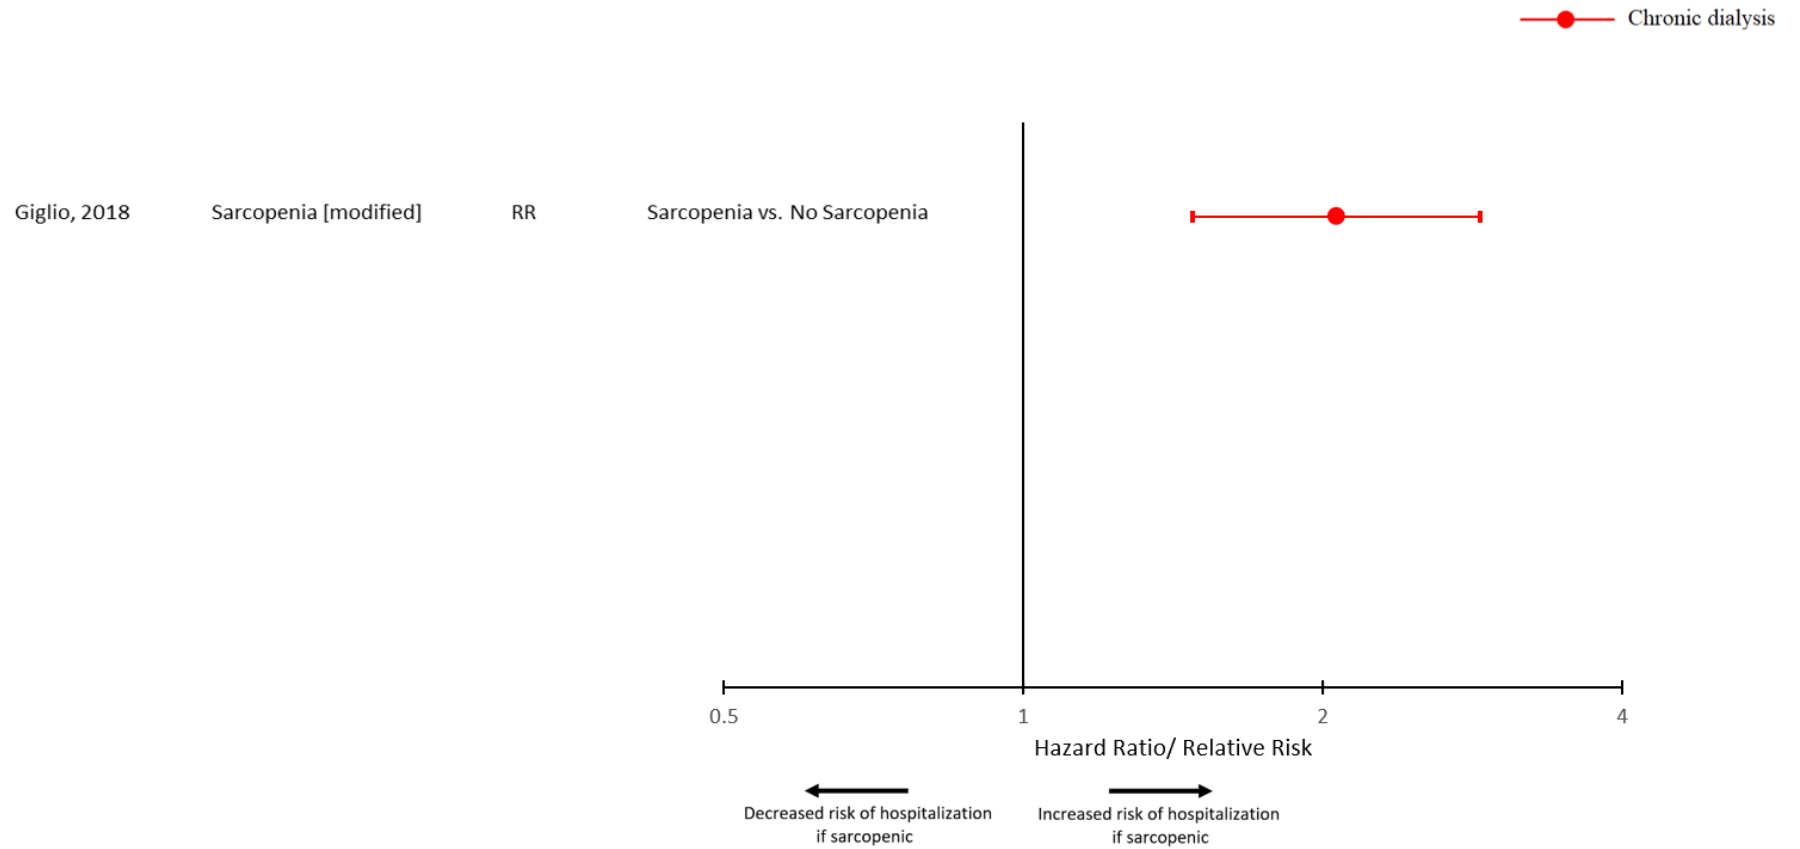

RR = relative risk

§ = Studies that did not provide measure of association are not displayed.

**Figure S12.** Forest plot of the association between gait speed as a categorical and continuous variable and hospitalization<sup>§</sup>

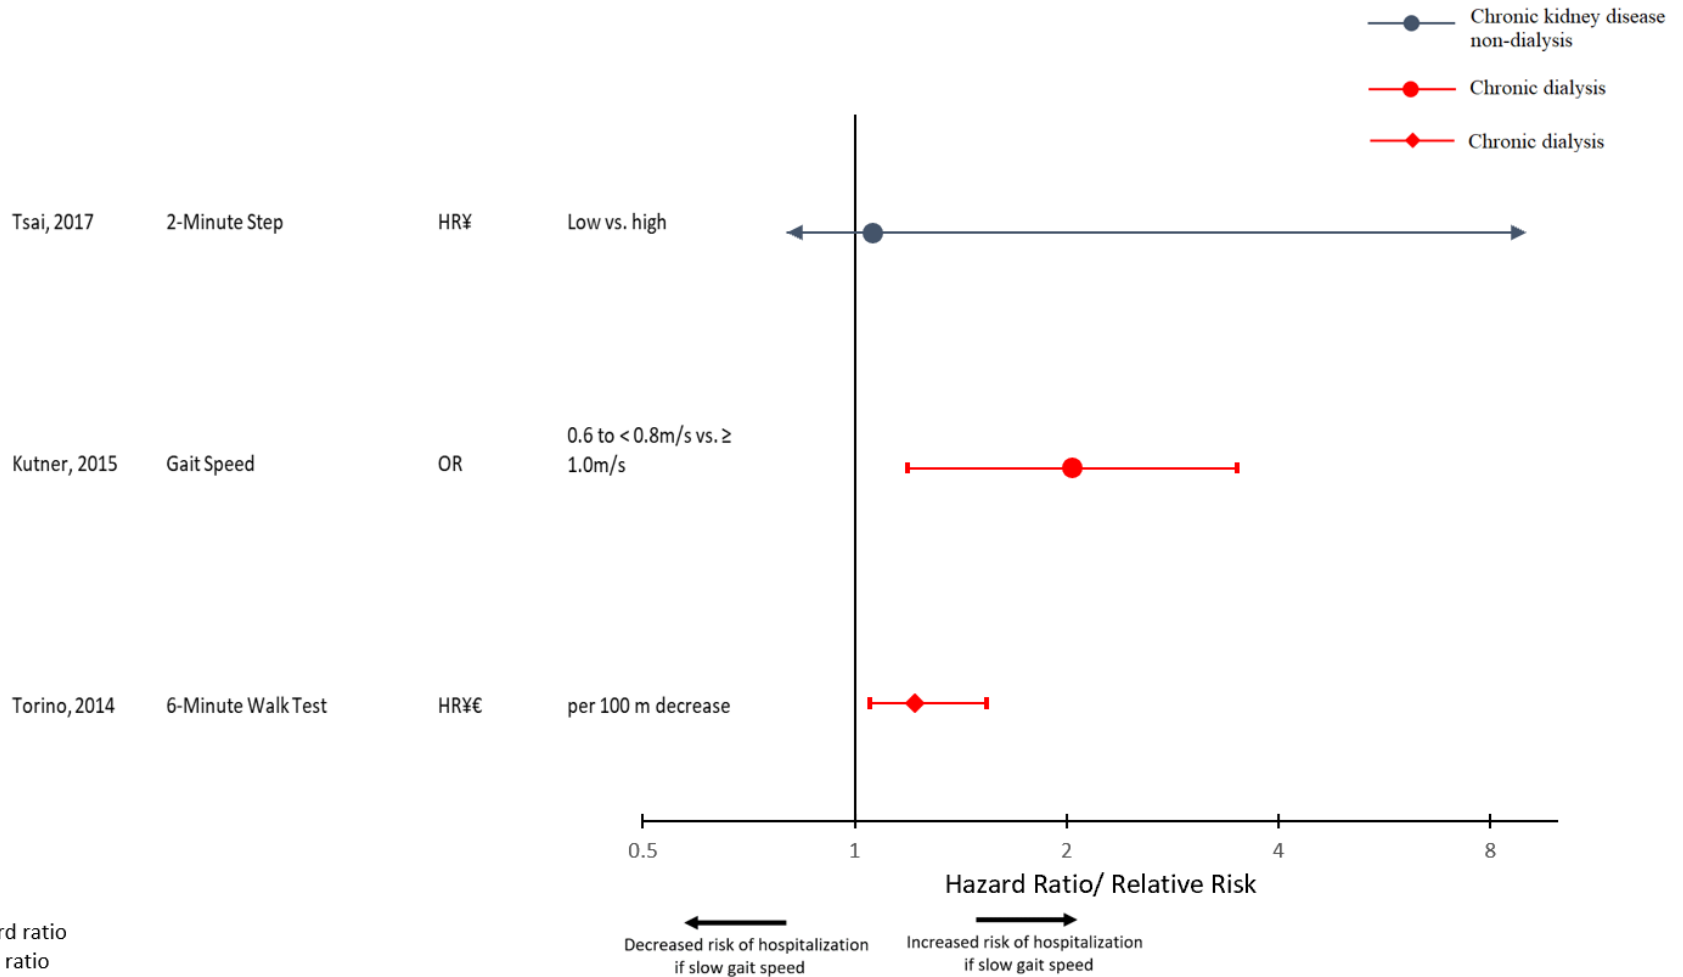

HR = hazard ratio  
 OR = odds ratio  
 ¥ = comparison was inverted  
 € = scale was transformed to be consistent with other values  
 • = categorical scale  
 ◆ = continuous scale  
 § = Studies that did not provide measure of association are not displayed.



**Figure S13.** Forest plot of the association between strength measurement as a categorical and continuous variable and hospitalization<sup>§</sup>

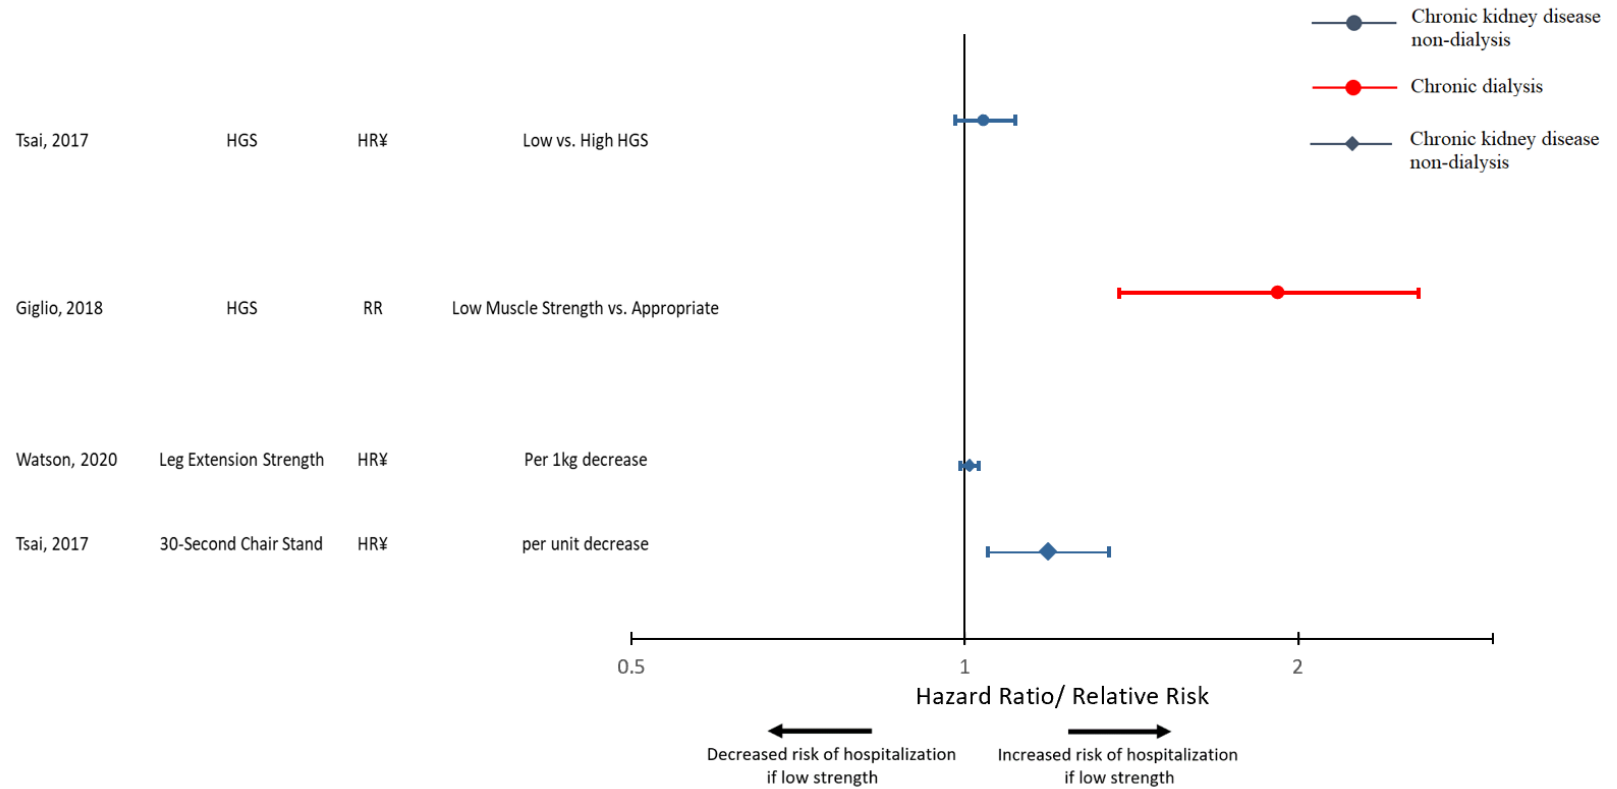

HR = hazard ratio  
 RR = relative risk  
 ¥ = comparison was inverted  
 • = categorical scale  
 ◆ = continuous scale  
 § = Studies that did not provide measure of association are not displayed.

**Figure S14.** Forest plot of the association between physical activity and fatigue as a categorical and continuous variable and hospitalization

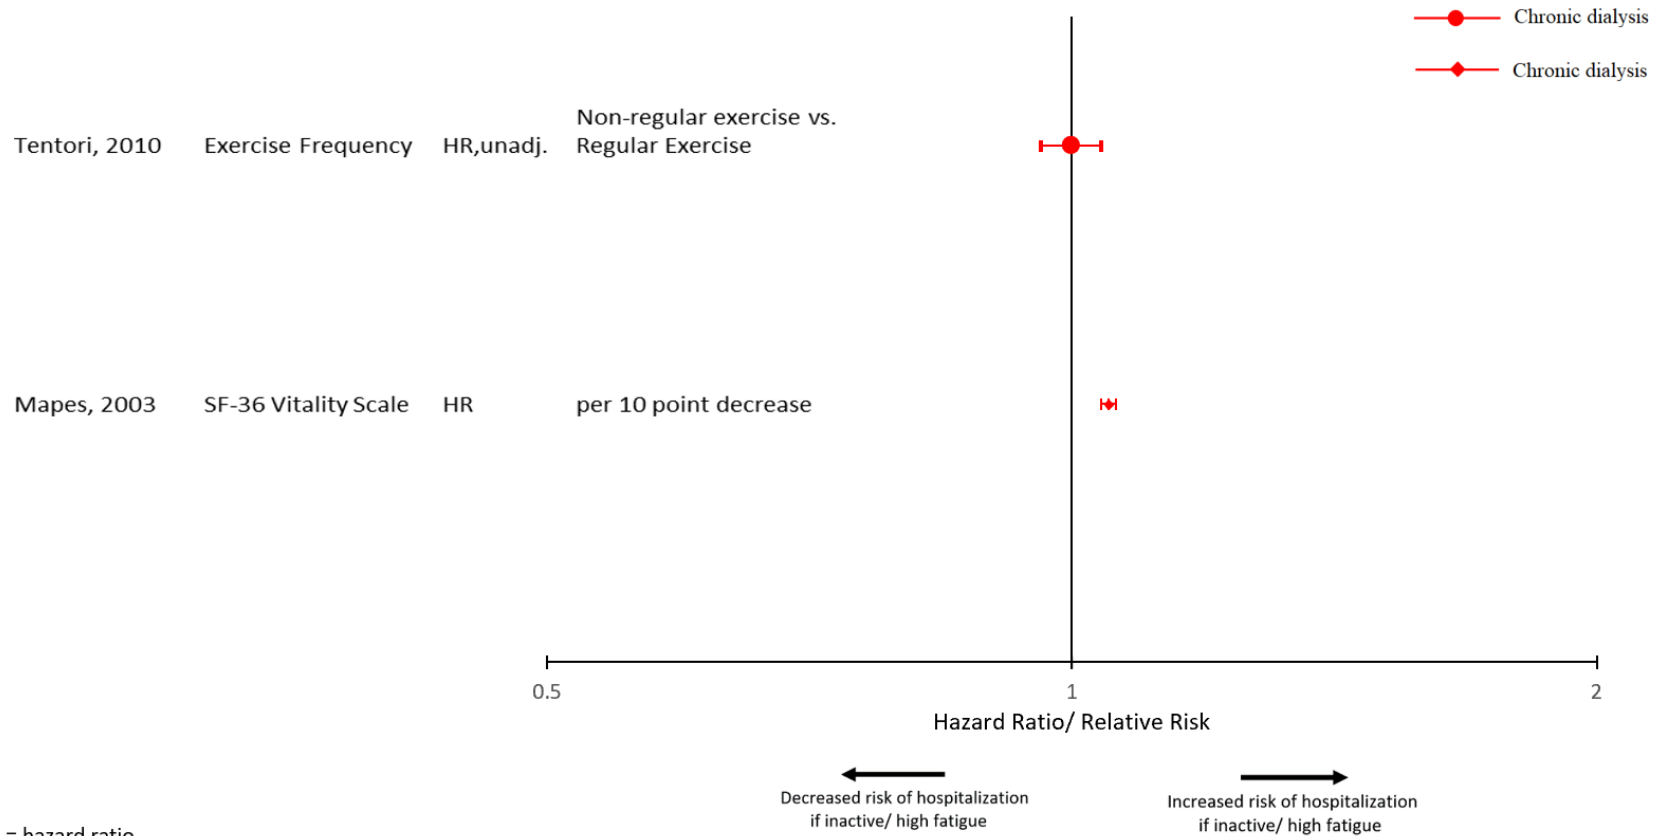

HR = hazard ratio  
 Unadj; unadjusted model  
 • = categorical scale  
 ♦ = continuous scale

**Figure S15.** Forest plot of the association between ADL impairment as a categorical variable and hospitalization<sup>§</sup>

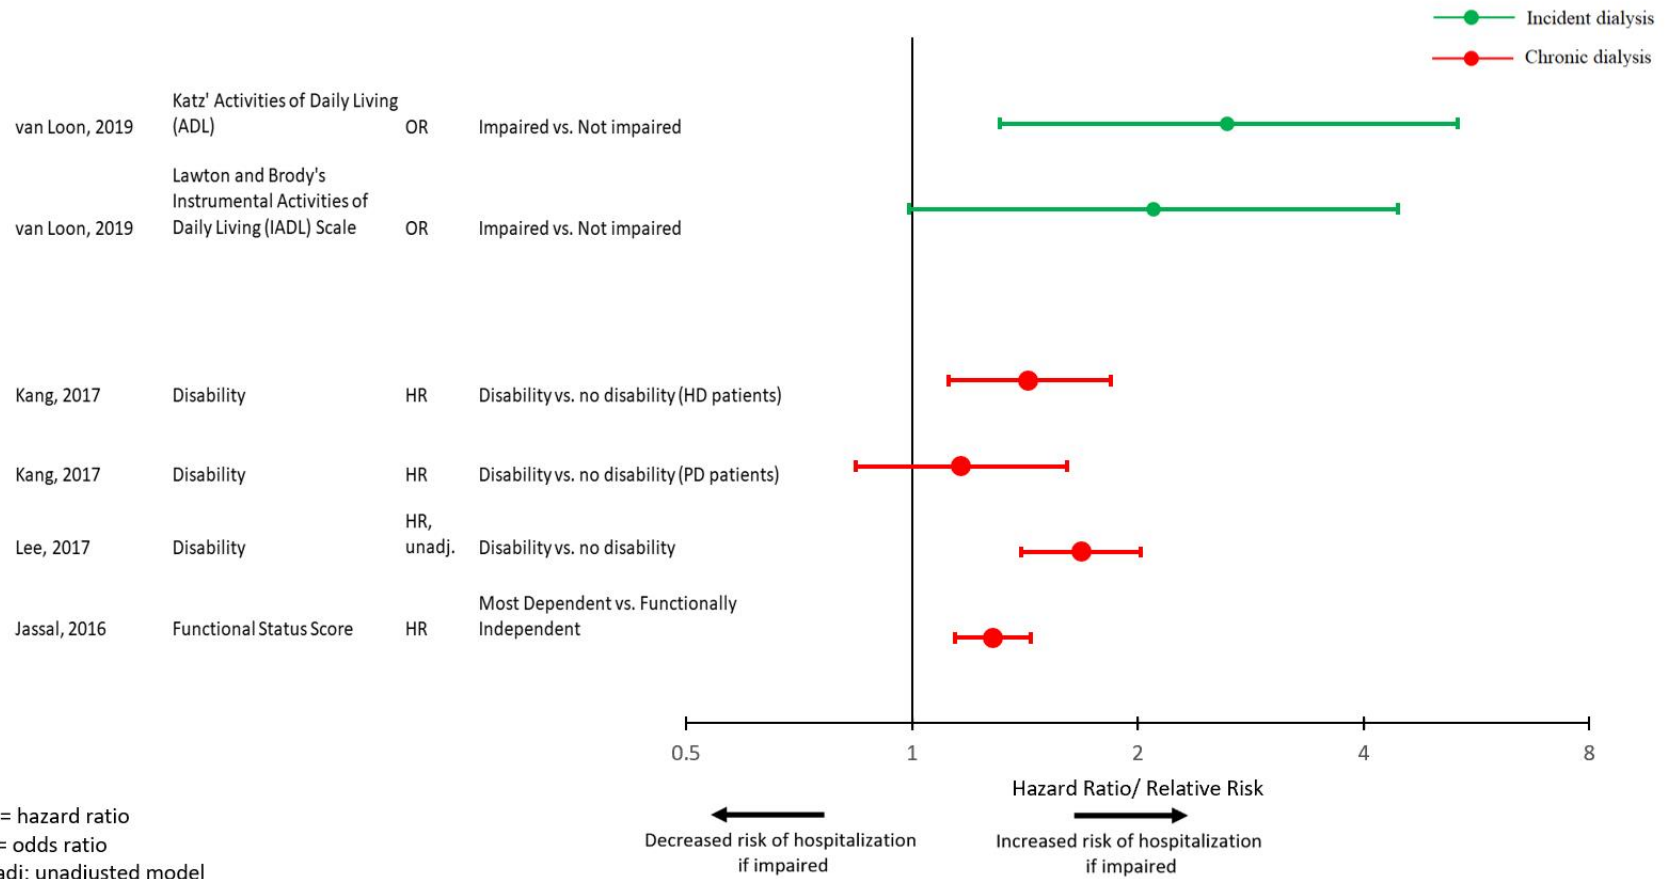

**Figure S16.** Forest plot of the association between performance scale as a continuous variable and hospitalization

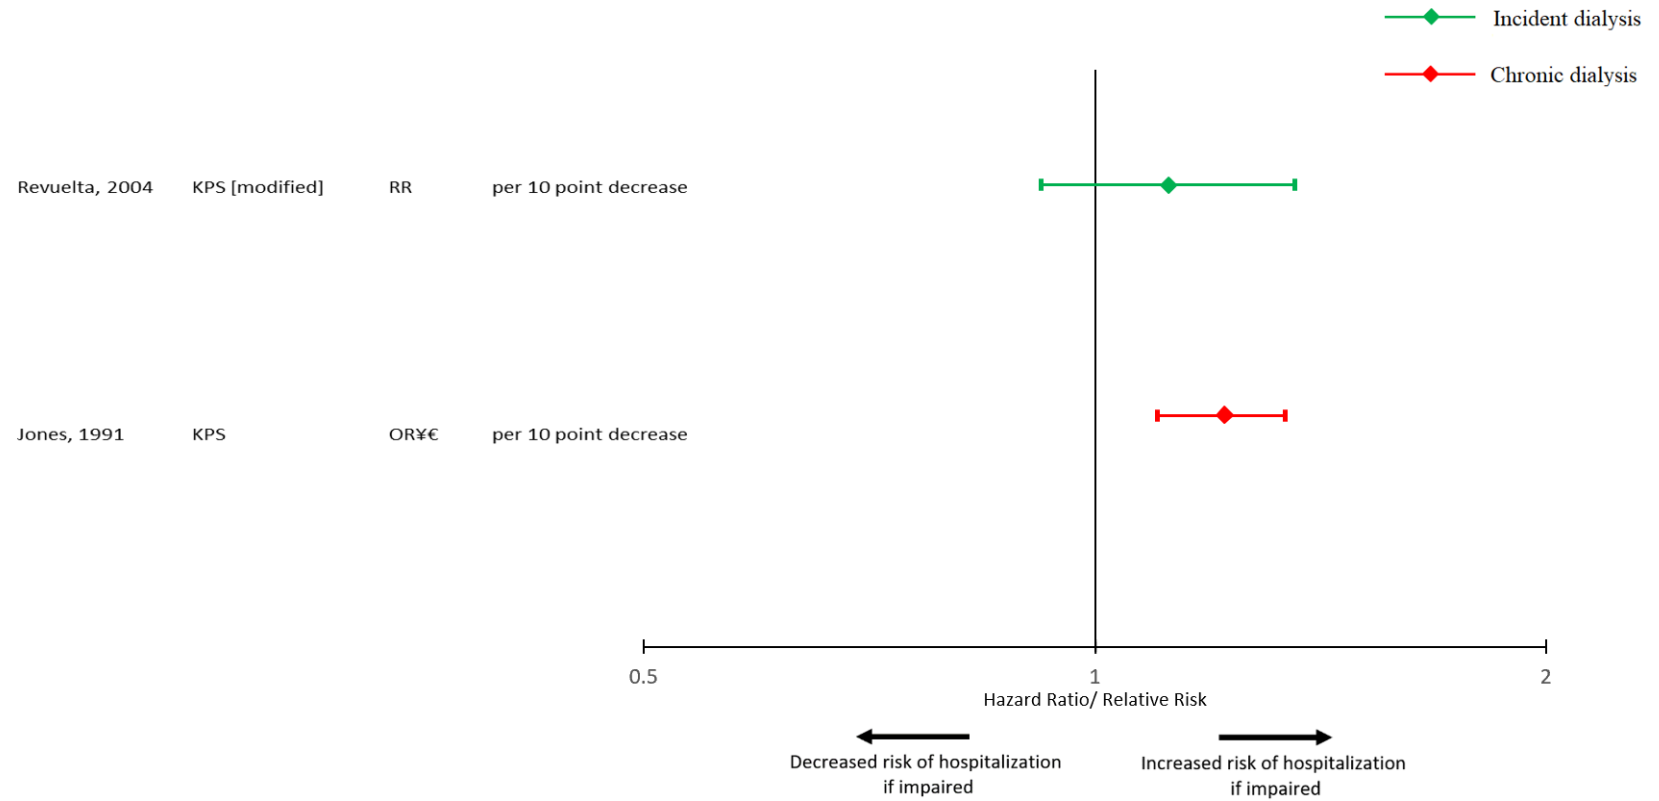

RR = relative risk  
 OR = odds ratio  
 ¥ = comparison was inverted  
 € = scale was transformed to be consistent with other values

**Figure S17.** Forest plot of the association between physical performance as a categorical or continuous variable and hospitalization

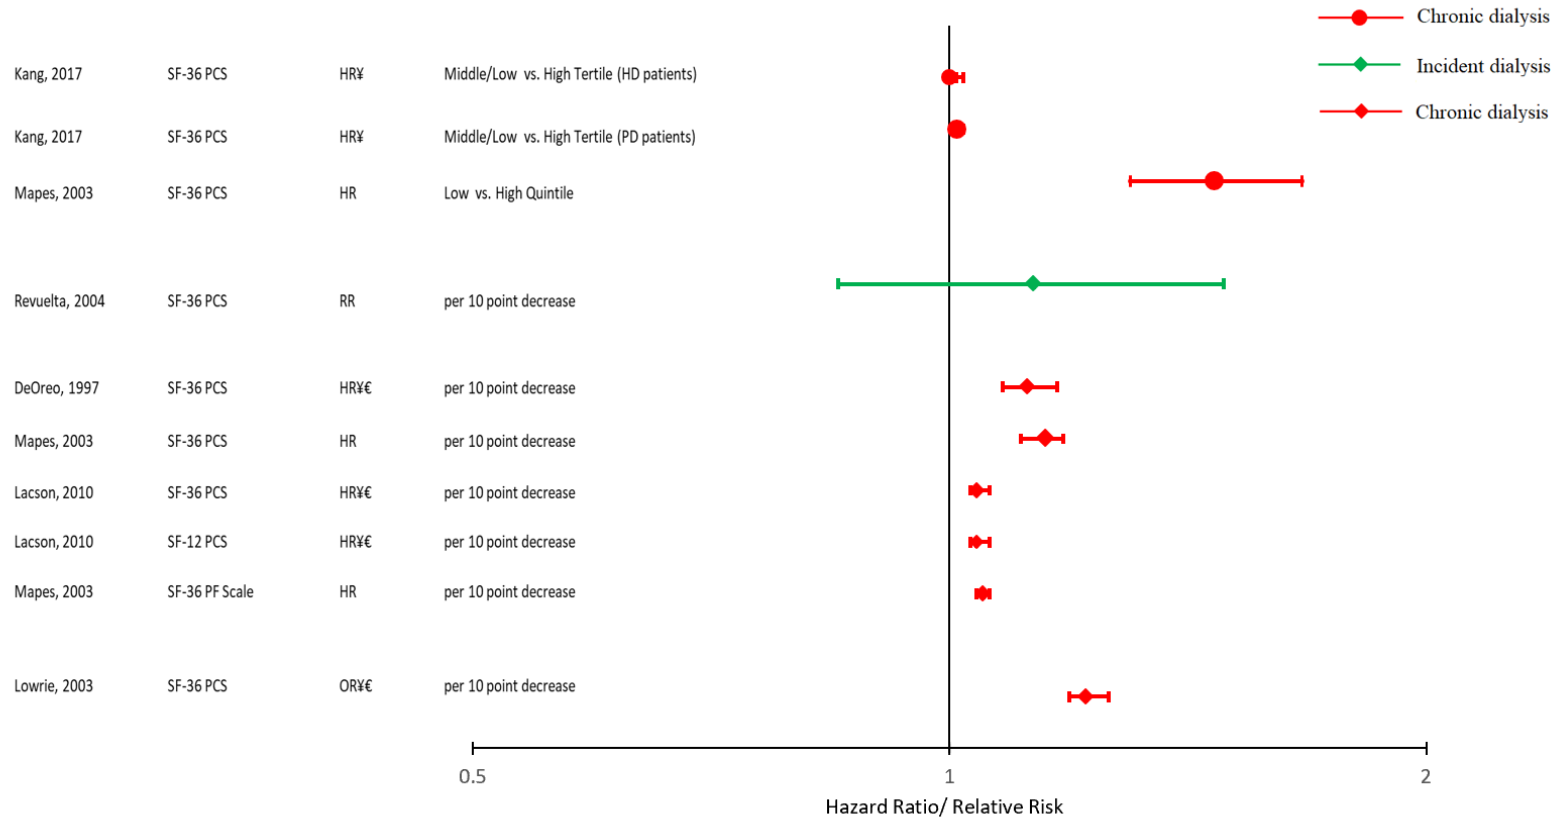

HR = hazard ratio  
 RR = relative risk  
 OR = odds ratio  
 ¥ = comparison was inverted  
 € = scale was transformed to be consistent with other values  
 • = categorical scale  
 ♦ = continuous scale

← Decreased risk of hospitalization if poor physical performance  
 → Increased risk of hospitalization if poor physical performance

## Item S1. MEDLINE Search strategy

Ovid MEDLINE(R) ALL 1946 to March 17, 2021

1. renal insufficiency/ or renal insufficiency, chronic/ or kidney failure, chronic/
2. renal replacement therapy/ or renal dialysis/ or peritoneal dialysis/ or kidney transplantation/
3. ((renal or kidney\*) adj2 (transplant\* or graft\* or replac\* or artificial\* or allograft\* or dialys\*)),tw,kw.
- Peritoneal Dialysis, Continuous Ambulatory/
4. h?emodialysis.tw,kw.
5. esrd.tw,kw.
6. esrf.tw,kw.
7. pre-esrd.tw,kw.
8. CKD.tw,kw.
9. ((kidney\* or renal) adj (failure\* or disease\* or insufficien\* or disorder\*)),tw,kw.
10. ((kidney\* or renal) adj replacement therap\*).tw,kw.
11. 1 or 2 or 3 or 4 or 5 or 6 or 7 or 8 or 9 or 10
12. Frail Elderly/
13. Geriatric Assessment/
14. muscle weakness/
15. sarcopenia/
16. Fatigue/
17. (frail\* or strength).tw,kw.
18. Sarcopenia\*.tw,kw.
19. Fatigue.ti,kw.
20. (muscle\* adj2 weak\*).tw.
21. Walking/
22. "Activities of Daily Living"/
23. mobility limitation/
24. (functional adj (status or performance or capacity or dependence or independence or ability or decline or disability)).tw,kw.
25. (physical adj (performance or capacity or ability or disability or function\* or fatigue)).tw,kw.
26. ((limit\* or decline) adj2 mobility).tw,kw.
27. activit\* of daily living.tw,kw.
28. daily living activit\*.tw,kw.
29. 12 or 13 or 14 or 15 or 16 or 17 or 18 or 19 or 20 or 21 or 22 or 23 or 24 or 25 or 26 or 27 or 28
30. 11 and 29
31. "reproducibility of results"/
32. "Predictive Value of Tests"/
33. Psychometrics/
34. (reliability or reproducib\* or measurement\* or measure or scale\* or index or indices or predict\* or psychometric\* or instrument\* or score\* or validity or validat\* or test or prognos\* or associat\*).tw,kw.
35. Validation Studies/
36. phenotype\*.tw.
37. risk.tw.
38. 31 or 32 or 33 or 34 or 35 or 36 or 37
39. 30 and 38
40. limit 39 to English

**Item S2.** References for the included studies

1. Alfaadhel TA, Soroka SD, Kiberd BA, et al. Frailty and mortality in dialysis: evaluation of a clinical frailty scale. *Clin J Am Soc Nephrol* 2015; 10: 832-840. DOI: 10.2215/CJN.07760814.
2. Ali H, Abdelaziz T, Abdelaal F, et al. Assessment of prevalence and clinical outcome of frailty in an elderly predialysis cohort using simple tools. *Saudi journal of kidney diseases and transplantation : an official publication of the Saudi Center for Organ Transplantation, Saudi Arabia* 2018; 29: 63-70. 2018/02/20. DOI: 10.4103/1319-2442.225175.
3. Anderson JE. Ten years' experience with CAPD in a nursing home setting. *Perit Dial Int* 1997; 17: 255-261. 1997/05/01.
4. Anderson JE, Kraus J and Sturgeon D. Incidence, prevalence, and outcomes of end-stage renal disease patients placed in nursing homes. *Am J Kidney Dis* 1993; 21: 619-627. DOI: 10.1016/s0272-6386(12)80034-5.
5. Anderson JE, Sturgeon D, Lindsay J, et al. Use of continuous ambulatory peritoneal dialysis in a nursing home: patient characteristics, technique success, and survival predictors. *Am J Kidney Dis* 1990; 16: 137-141. 1990/08/01. DOI: 10.1016/s0272-6386(12)80568-3.
6. Androga L, Sharma D, Amodu A, et al. Sarcopenia, obesity, and mortality in US adults with and without chronic kidney disease. *Kidney Int Rep* 2017; 2: 201-211. DOI: 10.1016/j.ekir.2016.10.008.
7. Arai Y, Kanda E, Kikuchi H, et al. Decreased mobility after starting dialysis is an independent risk factor for short-term mortality after initiation of dialysis. *Nephrology (Carlton)* 2014; 19: 227-233. DOI: 10.1111/nep.12202.
8. Argyropoulos C, Chang CC, Plantinga L, et al. Considerations in the statistical analysis of hemodialysis patient survival. *J Am Soc Nephrol* 2009; 20: 2034-2043. DOI: 10.1681/ASN.2008050551.
9. Bancu I, Graterol F, Bonal J, et al. Frail Patient in Hemodialysis: A New Challenge in Nephrology-Incidence in Our Area, Barcelones Nord and Maresme. *J Aging Res* 2017; 2017: 7624139. DOI: 10.1155/2017/7624139.
10. Bao Y, Dalrymple L, Chertow GM, et al. Frailty, dialysis initiation, and mortality in end-stage renal disease. *Arch Intern Med* 2012; 172: 1071-1077. DOI: 10.1001/archinternmed.2012.3020.
11. Beddhu S, Baird BC, Zitterkoph J, et al. Physical activity and mortality in chronic kidney disease (NHANES III). *Clin J Am Soc Nephrol* 2009; 4: 1901-1906. DOI: 10.2215/CJN.01970309.
12. Bordenave K, Tzamaloukas AH, Conneen S, et al. Twenty-one year mortality in a dialysis unit: changing effect of withdrawal from dialysis. *ASAIO journal (American Society for*

- Artificial Internal Organs : 1992) 1998; 44: 194-198. 1998/06/09. DOI: 10.1097/00002480-199805000-00014.
13. Bossola M, Di Stasio E, Antocicco M, et al. Fatigue Is Associated with Increased Risk of Mortality in Patients on Chronic Hemodialysis. *Nephron* 2015; 130: 113-118. DOI: 10.1159/000430827.
  14. Bossola M, Di Stasio E, Antocicco M, et al. Functional impairment is associated with an increased risk of mortality in patients on chronic hemodialysis. *BMC Nephrol* 2016; 17: 72. DOI: 10.1186/s12882-016-0302-y.
  15. Brar R, Whitlock R, Komenda P, et al. The Impact of Frailty on Technique Failure and Mortality in Patients on Home Dialysis. *Perit Dial Int* 2019; 39: 532-538. DOI: 10.3747/pdi.2018.00195.
  16. Brito DCS, Machado EL, Reis IA, et al. Impact of clinical, sociodemographic and quality of life factors on dialysis patient survival: a nine-year follow-up cohort study. *Cad Saude Publica* 2020; 36: e00007320. DOI: 10.1590/0102-311X00007320.
  17. Chan GC, N GJ, Chow KM, et al. Interaction between central obesity and frailty on the clinical outcome of peritoneal dialysis patients. *PLoS One* 2020; 15: e0241242. DOI: 10.1371/journal.pone.0241242.
  18. Chandna SM, Schulz J, Lawrence C, et al. Is there a rationale for rationing chronic dialysis? A hospital based cohort study of factors affecting survival and morbidity. *BMJ (Clinical research ed)* 1999; 318: 217-223. 1999/01/23. DOI: 10.1136/bmj.318.7178.217.
  19. Chang YT, Wu HL, Guo HR, et al. Handgrip strength is an independent predictor of renal outcomes in patients with chronic kidney diseases. *Nephrol Dial Transplant* 2011; 26: 3588-3595. DOI: 10.1093/ndt/gfr013.
  20. Chao CT, Huang JW, Chiang CK, et al. Applicability of laboratory deficit-based frailty index in predominantly older patients with end-stage renal disease under chronic dialysis: A pilot test of its correlation with survival and self-reported instruments. *Nephrology (Carlton)* 2020; 25: 73-81. DOI: 10.1111/nep.13583.
  21. Clarke AL, Zaccardi F, Gould DW, et al. Association of self-reported physical function with survival in patients with chronic kidney disease. *Clin Kidney J* 2019; 12: 122-128. DOI: 10.1093/ckj/sfy080.
  22. Dai L, Mukai H, Lindholm B, et al. Clinical global assessment of nutritional status as predictor of mortality in chronic kidney disease patients. *PLoS One* 2017; 12: e0186659. DOI: 10.1371/journal.pone.0186659.
  23. de Goeij MC, Ocak G, Rotmans JJ, et al. Course of symptoms and health-related quality of life during specialized pre-dialysis care. *PLoS One* 2014; 9: e93069. DOI: 10.1371/journal.pone.0093069.



24. de Oliveira MP, Kusumota L, Haas VJ, et al. Health-related quality of life as a predictor of mortality in patients on peritoneal dialysis. *Rev Lat Am Enfermagem* 2016; 24: e2687. DOI: 10.1590/1518-8345.0786.2687.
25. Delgado C, Grimes BA, Glidden DV, et al. Association of Frailty based on self-reported physical function with directly measured kidney function and mortality. *BMC Nephrol* 2015; 16: 203. DOI: 10.1186/s12882-015-0202-6.
26. Delgado C, Shieh S, Grimes B, et al. Association of Self-Reported Frailty with Falls and Fractures among Patients New to Dialysis. *Am J Nephrol* 2015; 42: 134-140. DOI: 10.1159/000439000.
27. DeOreo PB. Hemodialysis patient-assessed functional health status predicts continued survival, hospitalization, and dialysis-attendance compliance. *Am J Kidney Dis* 1997; 30: 204-212. 1997/08/01. DOI: 10.1016/s0272-6386(97)90053-6.
28. Ducharlet K, Sundararajan V, Philip J, et al. Patient-reported outcome measures and their utility in the management of patients with advanced chronic kidney disease. *Nephrology (Carlton)* 2019; 24: 814-818. DOI: 10.1111/nep.13509.
29. Farrokhi F and Jassal SV. Routine use of an abbreviated 4-item scale to assess dependence in essential activities of daily living amongst elderly hemodialysis patients: a validation study. *Int Urol Nephrol* 2013; 45: 259-264. DOI: 10.1007/s11255-012-0360-4.
30. Freedman BI, Soucie JM, Kenderes B, et al. Family history of end-stage renal disease does not predict dialytic survival. *Am J Kidney Dis* 2001; 38: 547-552. DOI: 10.1053/ajkd.2001.26851.
31. Fukuma S, Shimizu S, Shintani A, et al. Development and validation of a prediction model for loss of physical function in elderly hemodialysis patients. *Nephrol Dial Transplant* 2018; 33: 1452-1458. DOI: 10.1093/ndt/gfx260.
32. Giglio J, Kamimura MA, Lamarca F, et al. Association of Sarcopenia With Nutritional Parameters, Quality of Life, Hospitalization, and Mortality Rates of Elderly Patients on Hemodialysis. *J Ren Nutr* 2018; 28: 197-207. DOI: 10.1053/j.jrn.2017.12.003.
33. Goto NA, van Loon IN, Boereboom FTJ, et al. Association of Initiation of Maintenance Dialysis with Functional Status and Caregiver Burden. *Clin J Am Soc Nephrol* 2019; 14: 1039-1047. DOI: 10.2215/CJN.13131118.
34. Gregg LP, Jain N, Carmody T, et al. Fatigue in Nondialysis Chronic Kidney Disease: Correlates and Association with Kidney Outcomes. *Am J Nephrol* 2019; 50: 37-47. DOI: 10.1159/000500668.
35. Hall RK, Luciano A, Pendergast JF, et al. Self-reported Physical Function Decline and Mortality in Older Adults Receiving Hemodialysis. *Kidney Med* 2019; 1: 288-295. DOI: 10.1016/j.xkme.2019.08.001.

36. Hatakeyama S, Murasawa H, Hamano I, et al. Prognosis of elderly Japanese patients aged  $\geq 80$  years undergoing hemodialysis. *ScientificWorldJournal* 2013; 2013: 693514. DOI: 10.1155/2013/693514.
37. Hellberg M, Wiberg EM, Simonsen O, et al. Small distal muscles and balance predict survival in end-stage renal disease. *Nephron Clin Pract* 2014; 126: 116-123. DOI: 10.1159/000358431.
38. Ifudu O, Paul HR, Homel P, et al. Predictive value of functional status for mortality in patients on maintenance hemodialysis. *Am J Nephrol* 1998; 18: 109-116. 1998/05/07. DOI: 10.1159/000013318.
39. Inaguma D, Tanaka A and Shinjo H. Physical function at the time of dialysis initiation is associated with subsequent mortality. *Clin Exp Nephrol* 2017; 21: 425-435. DOI: 10.1007/s10157-016-1307-3.
40. Isoyama N, Qureshi AR, Avesani CM, et al. Comparative associations of muscle mass and muscle strength with mortality in dialysis patients. *Clin J Am Soc Nephrol* 2014; 9: 1720-1728. DOI: 10.2215/CJN.10261013.
41. Jafari M, Kour K, Giebel S, et al. The Burden of Frailty on Mood, Cognition, Quality of Life, and Level of Independence in Patients on Hemodialysis: Regina Hemodialysis Frailty Study. *Can J Kidney Health Dis* 2020; 7: 2054358120917780. DOI: 10.1177/2054358120917780.
42. Jassal SV, Karaboyas A, Comment LA, et al. Functional Dependence and Mortality in the International Dialysis Outcomes and Practice Patterns Study (DOPPS). *Am J Kidney Dis* 2016; 67: 283-292. DOI: 10.1053/j.ajkd.2015.09.024.
43. Jegatheswaran J, Chan R, Hiremath S, et al. Use of the FRAIL Questionnaire in Patients With End-Stage Kidney Disease. *Can J Kidney Health Dis* 2020; 7: 2054358120952904. DOI: 10.1177/2054358120952904.
44. Jhamb M, Argyropoulos C, Steel JL, et al. Correlates and outcomes of fatigue among incident dialysis patients. *Clin J Am Soc Nephrol* 2009; 4: 1779-1786. DOI: 10.2215/CJN.00190109.
45. Jhamb M, Pike F, Ramer S, et al. Impact of fatigue on outcomes in the hemodialysis (HEMO) study. *Am J Nephrol* 2011; 33: 515-523. DOI: 10.1159/000328004.
46. Jiang X, Li D, Shen W, et al. In-Hospital Outcomes of Patients on Maintenance Dialysis With Frailty: 10-year Results From the US National Inpatient Sample Database. *J Ren Nutr* 2020; 30: 526-534. DOI: 10.1053/j.jrn.2019.12.007.
47. Jin S, Lu Q, Su C, et al. Shortage of Appendicular Skeletal Muscle Is an Independent Risk Factor for Mortality in Peritoneal Dialysis Patients. *Perit Dial Int* 2017; 37: 78-84. DOI: 10.3747/pdi.2016.00019.

48. Johansen KL, Chertow GM, Jin C, et al. Significance of frailty among dialysis patients. *J Am Soc Nephrol* 2007; 18: 2960-2967. DOI: 10.1681/ASN.2007020221.
49. Johansen KL, Dalrymple LS, Glidden D, et al. Association of Performance-Based and Self-Reported Function-Based Definitions of Frailty with Mortality among Patients Receiving Hemodialysis. *Clin J Am Soc Nephrol* 2016; 11: 626-632. DOI: 10.2215/CJN.03710415.
50. Joly D, Anglicheau D, Alberti C, et al. Octogenarians reaching end-stage renal disease: cohort study of decision-making and clinical outcomes. *J Am Soc Nephrol* 2003; 14: 1012-1021. DOI: 10.1097/01.asn.0000054493.04151.80.
51. Jones KR. Factors associated with hospitalization in a sample of chronic hemodialysis patients. *Health services research* 1991; 26: 671-699. 1991/12/01.
52. Kalantar SS, You AS, Norris KC, et al. The Impact of Race and Ethnicity Upon Health-Related Quality of Life and Mortality in Dialysis Patients. *Kidney Med* 2019; 1: 253-262. DOI: 10.1016/j.xkme.2019.07.005.
53. Kamijo Y, Kanda E, Ishibashi Y, et al. Sarcopenia and Frailty in PD: Impact on Mortality, Malnutrition, and Inflammation. *Perit Dial Int* 2018; 38: 447-454. DOI: 10.3747/pdi.2017.00271.
54. Kang SH, Do JY, Jeong HY, et al. The Clinical Significance of Physical Activity in Maintenance Dialysis Patients. *Kidney Blood Press Res* 2017; 42: 575-586. DOI: 10.1159/000480674.
55. Kang SH, Do JY, Lee SY, et al. Effect of dialysis modality on frailty phenotype, disability, and health-related quality of life in maintenance dialysis patients. *PLoS One* 2017; 12: e0176814. DOI: 10.1371/journal.pone.0176814.
56. Kang SH, Park JW, Yoon KW, et al. Limb/trunk lean mass ratio as a risk factor for mortality in peritoneal dialysis patients. *J Ren Nutr* 2013; 23: 315-323. DOI: 10.1053/j.jrn.2012.09.004.
57. Kim JK, Kim SG, Oh JE, et al. Impact of sarcopenia on long-term mortality and cardiovascular events in patients undergoing hemodialysis. *Korean J Intern Med* 2019; 34: 599-607. DOI: 10.3904/kjim.2017.083.
58. Kittiskulnam P, Chertow GM, Carrero JJ, et al. Sarcopenia and its individual criteria are associated, in part, with mortality among patients on hemodialysis. *Kidney Int* 2017; 92: 238-247. DOI: 10.1016/j.kint.2017.01.024.
59. Knight EL, Ofsthun N, Teng M, et al. The association between mental health, physical function, and hemodialysis mortality. *Kidney Int* 2003; 63: 1843-1851. 2003/04/05. DOI: 10.1046/j.1523-1755.2003.00931.x.
60. Kohl Lde M, Signori LU, Ribeiro RA, et al. Prognostic value of the six-minute walk test in end-stage renal disease life expectancy: a prospective cohort study. *Clinics (Sao Paulo)* 2012; 67: 581-586. DOI: 10.6061/clinics/2012(06)06.

61. Koyama H, Fukuda S, Shoji T, et al. Fatigue is a predictor for cardiovascular outcomes in patients undergoing hemodialysis. *Clin J Am Soc Nephrol* 2010; 5: 659-666. DOI: 10.2215/CJN.08151109.
62. Kruse NT, Buzkova P, Barzilay JI, et al. Association of skeletal muscle mass, kidney disease and mortality in older men and women: the cardiovascular health study. *Aging* 2020; 12: 21023-21036. 2020/11/04. DOI: 10.18632/aging.202135.
63. Kuki A, Tanaka K, Kushiyaama A, et al. Association of gait speed and grip strength with risk of cardiovascular events in patients on haemodialysis: a prospective study. *BMC Nephrol* 2019; 20: 196. DOI: 10.1186/s12882-019-1370-6.
64. Kurita N, Akizawa T and Fukuhara S. Vitality Measured as Self-reported Energy Level and Clinical Outcomes in Hemodialysis Patients: The Japanese Dialysis Outcomes and Practice Pattern Study (J-DOPPS). *Am J Kidney Dis* 2019; 73: 486-495. DOI: 10.1053/j.ajkd.2018.10.001.
65. Kutner NG, Brogan D and Fielding B. Physical and psychosocial resource variables related to long-term survival in older dialysis patients. *Geriatric nephrology and urology* 1997; 7: 23-28. 1997/01/01. DOI: 10.1023/a:1008204311582.
66. Kutner NG, Lin LS, Fielding B, et al. Continued survival of older hemodialysis patients: investigation of psychosocial predictors. *Am J Kidney Dis* 1994; 24: 42-49. DOI: 10.1016/s0272-6386(12)80158-2.
67. Kutner NG, Zhang R, Huang Y, et al. Gait Speed and Mortality, Hospitalization, and Functional Status Change Among Hemodialysis Patients: A US Renal Data System Special Study. *Am J Kidney Dis* 2015; 66: 297-304. DOI: 10.1053/j.ajkd.2015.01.024.
68. Lacson E, Jr., Xu J, Lin SF, et al. A comparison of SF-36 and SF-12 composite scores and subsequent hospitalization and mortality risks in long-term dialysis patients. *Clin J Am Soc Nephrol* 2010; 5: 252-260. DOI: 10.2215/CJN.07231009.
69. Lee SW, Lee A, Yu MY, et al. Is Frailty a Modifiable Risk Factor of Future Adverse Outcomes in Elderly Patients with Incident End-Stage Renal Disease? *J Korean Med Sci* 2017; 32: 1800-1806. DOI: 10.3346/jkms.2017.32.11.1800.
70. Lee SY, Yang DH, Hwang E, et al. The Prevalence, Association, and Clinical Outcomes of Frailty in Maintenance Dialysis Patients. *J Ren Nutr* 2017; 27: 106-112. DOI: 10.1053/j.jrn.2016.11.003.
71. Lee YH, Kim JS, Jung SW, et al. Gait speed and handgrip strength as predictors of all-cause mortality and cardiovascular events in hemodialysis patients. *BMC Nephrol* 2020; 21: 166. DOI: 10.1186/s12882-020-01831-8.
72. Lin YL, Hou JS, Lai YH, et al. Association of SARC-F Questionnaire and Mortality in Prevalent Hemodialysis Patients. *Diagnostics (Basel)* 2020; 10. DOI: 10.3390/diagnostics10110890.

73. Lin YL, Liou HH, Wang CH, et al. Impact of sarcopenia and its diagnostic criteria on hospitalization and mortality in chronic hemodialysis patients: A 3-year longitudinal study. *J Formos Med Assoc* 2020; 119: 1219-1229. DOI: 10.1016/j.jfma.2019.10.020.
74. Lopes AA, Lantz B, Morgenstern H, et al. Associations of self-reported physical activity types and levels with quality of life, depression symptoms, and mortality in hemodialysis patients: the DOPPS. *Clin J Am Soc Nephrol* 2014; 9: 1702-1712. DOI: 10.2215/CJN.12371213.
75. Lopez Revuelta K, Garcia Lopez FJ, de Alvaro Moreno F, et al. Perceived mental health at the start of dialysis as a predictor of morbidity and mortality in patients with end-stage renal disease (CALVIDIA Study). *Nephrol Dial Transplant* 2004; 19: 2347-2353. DOI: 10.1093/ndt/gfh392.
76. Lopez-Montes A, Martinez-Villaescusa M, Perez-Rodriguez A, et al. Frailty, physical function and affective status in elderly patients on hemodialysis. *Arch Gerontol Geriatr* 2020; 87: 103976. DOI: 10.1016/j.archger.2019.103976.
77. Lowrie EG, Curtin RB, LePain N, et al. Medical outcomes study short form-36: a consistent and powerful predictor of morbidity and mortality in dialysis patients. *Am J Kidney Dis* 2003; 41: 1286-1292. DOI: 10.1016/s0272-6386(03)00361-5.
78. Mansur HN, Lovisi JC, Colugnati FA, et al. Association of frailty with endothelial dysfunction and its possible impact on negative outcomes in Brazilian predialysis patients with chronic kidney disease. *BMC Nephrol* 2015; 16: 157. DOI: 10.1186/s12882-015-0150-1.
79. Mapes DL, Lopes AA, Satayathum S, et al. Health-related quality of life as a predictor of mortality and hospitalization: the Dialysis Outcomes and Practice Patterns Study (DOPPS). *Kidney Int* 2003; 64: 339-349. DOI: 10.1046/j.1523-1755.2003.00072.x.
80. Matos CM, Silva LF, Santana LD, et al. Handgrip strength at baseline and mortality risk in a cohort of women and men on hemodialysis: a 4-year study. *J Ren Nutr* 2014; 24: 157-162. DOI: 10.1053/j.jrn.2013.12.005.
81. Matsuzawa R, Kamitani T, Roshanravan B, et al. Decline in the Functional Status and Mortality in Patients on Hemodialysis: Results from the Japan Dialysis Outcome and Practice Patterns Study. *J Ren Nutr* 2019; 29: 504-510. DOI: 10.1053/j.jrn.2018.10.012.
82. Matsuzawa R, Matsunaga A, Wang G, et al. Relationship between lower extremity muscle strength and all-cause mortality in Japanese patients undergoing dialysis. *Physical therapy* 2014; 94: 947-956. 2014/03/01. DOI: 10.2522/ptj.20130270.
83. McAdams-DeMarco MA, Law A, Salter ML, et al. Frailty as a novel predictor of mortality and hospitalization in individuals of all ages undergoing hemodialysis. *J Am Geriatr Soc* 2013; 61: 896-901. DOI: 10.1111/jgs.12266.
84. McAdams-DeMarco MA, Tan J, Salter ML, et al. Frailty and Cognitive Function in Incident Hemodialysis Patients. *Clin J Am Soc Nephrol* 2015; 10: 2181-2189. DOI: 10.2215/CJN.01960215.

85. McClellan WM, Anson C, Birkeli K, et al. Functional status and quality of life: predictors of early mortality among patients entering treatment for end stage renal disease. *Journal of clinical epidemiology* 1991; 44: 83-89. 1991/01/01. DOI: 10.1016/0895-4356(91)90204-m.
86. McClellan WM, Flanders WD and Gutman RA. Variable mortality rates among dialysis treatment centers. *Annals of internal medicine* 1992; 117: 332-336. 1992/08/15. DOI: 10.7326/0003-4819-117-4-332.
87. Meulendijks FG, Hamaker ME, Boereboom FT, et al. Groningen frailty indicator in older patients with end-stage renal disease. *Ren Fail* 2015; 37: 1419-1424. DOI: 10.3109/0886022X.2015.1077315.
88. Mori K, Nishide K, Okuno S, et al. Impact of diabetes on sarcopenia and mortality in patients undergoing hemodialysis. *BMC Nephrol* 2019; 20: 105. DOI: 10.1186/s12882-019-1271-8.
89. Navaneethan SD, Kirwan JP, Arrigain S, et al. Adiposity measures, lean body mass, physical activity and mortality: NHANES 1999-2004. *BMC Nephrol* 2014; 15: 108. 2014/07/10. DOI: 10.1186/1471-2369-15-108.
90. Ng JK, Kwan BC, Chow KM, et al. Frailty in Chinese Peritoneal Dialysis Patients: Prevalence and Prognostic Significance. *Kidney Blood Press Res* 2016; 41: 736-745. DOI: 10.1159/000450563.
91. Nixon AC, Brown J, Brotherton A, et al. Implementation of a frailty screening programme and Geriatric Assessment Service in a nephrology centre: a quality improvement project. *J Nephrol* 2021; 34: 1215-1224. DOI: 10.1007/s40620-020-00878-y.
92. Noori N, Kopple JD, Kovesdy CP, et al. Mid-arm muscle circumference and quality of life and survival in maintenance hemodialysis patients. *Clin J Am Soc Nephrol* 2010; 5: 2258-2268. DOI: 10.2215/CJN.02080310.
93. Peng YS, Chiang CK, Hung KY, et al. Are both psychological and physical dimensions in health-related quality of life associated with mortality in hemodialysis patients: a 7-year Taiwan cohort study. *Blood Purif* 2010; 30: 98-105. DOI: 10.1159/000319002.
94. Peng YS, Huang JW, Hung KY, et al. Women on hemodialysis have lower self-reported health-related quality of life scores but better survival than men. *J Nephrol* 2013; 26: 366-374. DOI: 10.5301/jn.5000153.
95. Pereira RA, Cordeiro AC, Avesani CM, et al. Sarcopenia in chronic kidney disease on conservative therapy: prevalence and association with mortality. *Nephrol Dial Transplant* 2015; 30: 1718-1725. DOI: 10.1093/ndt/gfv133.
96. Plantinga LC, Patzer RE, Franch HA, et al. Serious Fall Injuries Before and After Initiation of Hemodialysis Among Older ESRD Patients in the United States: A Retrospective Cohort Study. *Am J Kidney Dis* 2017; 70: 76-83. DOI: 10.1053/j.ajkd.2016.11.021.

97. Pugh J, Aggett J, Goodland A, et al. Frailty and comorbidity are independent predictors of outcome in patients referred for pre-dialysis education. *Clin Kidney J* 2016; 9: 324-329. DOI: 10.1093/ckj/sfv150.
98. Rampersad C, Brar R, Connelly K, et al. Association of Physical Activity and Poor Health Outcomes in Patients With Advanced CKD. *Am J Kidney Dis* 2021; 78: 391-398. DOI: 10.1053/j.ajkd.2020.12.018.
99. Ren H, Gong D, Jia F, et al. Sarcopenia in patients undergoing maintenance hemodialysis: incidence rate, risk factors and its effect on survival risk. *Ren Fail* 2016; 38: 364-371. DOI: 10.3109/0886022X.2015.1132173.
100. Ritchie JP, Alderson H, Green D, et al. Functional status and mortality in chronic kidney disease: results from a prospective observational study. *Nephron Clin Pract* 2014; 128: 22-28. DOI: 10.1159/000362453.
101. Roberts JL. Analysis and outcome of 1063 patients trained for home hemodialysis. *Kidney Int* 1976; 9: 363-374. DOI: 10.1038/ki.1976.43.
102. Robinson-Cohen C, Littman AJ, Duncan GE, et al. Physical activity and change in estimated GFR among persons with CKD. *J Am Soc Nephrol* 2014; 25: 399-406. DOI: 10.1681/ASN.2013040392.
103. Roshanravan B, Khatri M, Robinson-Cohen C, et al. A prospective study of frailty in nephrology-referred patients with CKD. *Am J Kidney Dis* 2012; 60: 912-921. DOI: 10.1053/j.ajkd.2012.05.017.
104. Roshanravan B, Robinson-Cohen C, Patel KV, et al. Association between physical performance and all-cause mortality in CKD. *J Am Soc Nephrol* 2013; 24: 822-830. DOI: 10.1681/ASN.2012070702.
105. Rymarz A, Gibinska J, Zajbt M, et al. Low lean tissue mass can be a predictor of one-year survival in hemodialysis patients. *Ren Fail* 2018; 40: 231-237. DOI: 10.1080/0886022X.2018.1456451.
106. Santos PR. Evaluation of objective and subjective indicators of death in a period of one year in a sample of prevalent patients under regular hemodialysis. *BMC research notes* 2012; 5: 24. 2012/01/13. DOI: 10.1186/1756-0500-5-24.
107. Shah S, Leonard AC and Thakar CV. Functional status, pre-dialysis health and clinical outcomes among elderly dialysis patients. *BMC Nephrol* 2018; 19: 100. DOI: 10.1186/s12882-018-0898-1.
108. Shavit L, Mikeladze I, Torem C, et al. Mild hyponatremia is associated with functional and cognitive decline in chronic hemodialysis patients. *Clin Nephrol* 2014; 82: 313-319. DOI: 10.5414/CN108335.

109. Shi Y, Zheng D, Zhang L, et al. Six-minute walk test predicts all-cause mortality and technique failure in ambulatory peritoneal dialysis patients. *Nephrology (Carlton)* 2017; 22: 118-124. DOI: 10.1111/nep.12726.
110. Shimoda T, Matsuzawa R, Yoneki K, et al. Combined Contribution of Reduced Functional Mobility, Muscle Weakness, and Low Serum Albumin in Prediction of All-Cause Mortality in Hemodialysis Patients: A Retrospective Cohort Study. *J Ren Nutr* 2018; 28: 302-308. DOI: 10.1053/j.jrn.2017.12.012.
111. Shum CK, Tam KF, Chak WL, et al. Outcomes in older adults with stage 5 chronic kidney disease: comparison of peritoneal dialysis and conservative management. *J Gerontol A Biol Sci Med Sci* 2014; 69: 308-314. DOI: 10.1093/gerona/glt098.
112. Song YR, Kim JK, Lee HS, et al. Serum levels of protein carbonyl, a marker of oxidative stress, are associated with overhydration, sarcopenia and mortality in hemodialysis patients. *BMC Nephrol* 2020; 21: 281. DOI: 10.1186/s12882-020-01937-z.
113. Sood MM, Rigatto C, Buetti J, et al. The role of functional status in discharge to assisted care facilities and in-hospital death among dialysis patients. *Am J Kidney Dis* 2011; 58: 804-812. DOI: 10.1053/j.ajkd.2011.06.017.
114. Souweine JS, Pasquier G, Kuster N, et al. Dynapnea and sarcopenia in chronic haemodialysis patients: do muscle weakness and atrophy similarly influence poor outcome? *Nephrol Dial Transplant* 2021; 36: 1908-1918. DOI: 10.1093/ndt/gfaa353.
115. Stenvinkel P, Barany P, Chung SH, et al. A comparative analysis of nutritional parameters as predictors of outcome in male and female ESRD patients. *Nephrol Dial Transplant* 2002; 17: 1266-1274. 2002/07/10. DOI: 10.1093/ndt/17.7.1266.
116. Sy J, McCulloch CE and Johansen KL. Depressive symptoms, frailty, and mortality among dialysis patients. *Hemodial Int* 2019; 23: 239-246. DOI: 10.1111/hdi.12747.
117. Takaki J, Nakao M and Yano E. The relationship of quality of life and depression to mortality in hemodialysis patients. *Dialysis & transplantation* 2005; 34: 568-575.
118. Tennankore K, Zhao J, Karaboyas A, et al. The Association of Functional Status with Mortality and Dialysis Modality Change: Results from the Peritoneal Dialysis Outcomes and Practice Patterns Study (PDOPPS). *Perit Dial Int* 2019; 39: 103-111. DOI: 10.3747/pdi.2018.00094.
119. Tentori F, Elder SJ, Thumma J, et al. Physical exercise among participants in the Dialysis Outcomes and Practice Patterns Study (DOPPS): correlates and associated outcomes. *Nephrol Dial Transplant* 2010; 25: 3050-3062. DOI: 10.1093/ndt/gfq138.
120. Torino C, Manfredini F, Bolignano D, et al. Physical performance and clinical outcomes in dialysis patients: a secondary analysis of the EXCITE trial. *Kidney Blood Press Res* 2014; 39: 205-211. DOI: 10.1159/000355798.



121. Torino C, Raso FM, van Saase J, et al. Physical functioning and mortality in very old patients on dialysis. *Arch Gerontol Geriatr* 2019; 85: 103918. DOI: 10.1016/j.archger.2019.103918.
122. Tsai YC, Chen HM, Hsiao SM, et al. Association of physical activity with cardiovascular and renal outcomes and quality of life in chronic kidney disease. *PLoS One* 2017; 12: e0183642. DOI: 10.1371/journal.pone.0183642.
123. Turkmen K, Guney I, Yazici R, et al. Health-related quality of life, depression and mortality in peritoneal dialysis patients in Turkey: seven-year experience of a center. *Ren Fail* 2014; 36: 859-864. DOI: 10.3109/0886022X.2014.899874.
124. Utaş C. Patient and technique survival on CAPD in Turkey. *Perit Dial Int* 2001; 21: 602-606. 2002/01/11.
125. Valenzuela PL, Cobo F, Diez-Vega I, et al. Physical performance, plasma S-klotho, and all-cause mortality in elderly dialysis patients: A prospective cohort study. *Exp Gerontol* 2019; 122: 123-128. DOI: 10.1016/j.exger.2019.05.003.
126. van Loon I, Hamaker ME, Boereboom FTJ, et al. A closer look at the trajectory of physical functioning in chronic hemodialysis. *Age Ageing* 2017; 46: 594-599. DOI: 10.1093/ageing/afx006.
127. van Loon IN, Bots ML, Boereboom FTJ, et al. Quality of life as indicator of poor outcome in hemodialysis: relation with mortality in different age groups. *BMC Nephrol* 2017; 18: 217. DOI: 10.1186/s12882-017-0621-7.
128. van Loon IN, Goto NA, Boereboom FTJ, et al. Geriatric Assessment and the Relation with Mortality and Hospitalizations in Older Patients Starting Dialysis. *Nephron* 2019; 143: 108-119. DOI: 10.1159/000501277.
129. Vezza C, Vettoretti S, Caldiroli L, et al. Use of the Frailty Index in Older Persons With Chronic Kidney Disease. *J Am Med Dir Assoc* 2019; 20: 1179-1180. DOI: 10.1016/j.jamda.2019.04.015.
130. Vogt BP, Borges MCC, Goes CR, et al. Handgrip strength is an independent predictor of all-cause mortality in maintenance dialysis patients. *Clin Nutr* 2016; 35: 1429-1433. DOI: 10.1016/j.clnu.2016.03.020.
131. Wang AY, Sanderson JE, Sea MM, et al. Handgrip strength, but not other nutrition parameters, predicts circulatory congestion in peritoneal dialysis patients. *Nephrol Dial Transplant* 2010; 25: 3372-3379. DOI: 10.1093/ndt/gfq216.
132. Wang AY, Sea MM, Ho ZS, et al. Evaluation of handgrip strength as a nutritional marker and prognostic indicator in peritoneal dialysis patients. *The American journal of clinical nutrition* 2005; 81: 79-86. 2005/01/11. DOI: 10.1093/ajcn/81.1.79.

133. Watanabe T, Kutsuna T, Suzuki Y, et al. Perceived difficulty in activities of daily living and survival in patients receiving maintenance hemodialysis. *Int Urol Nephrol* 2021; 53: 177-184. DOI: 10.1007/s11255-020-02600-0.
134. Watson EL, Major RW, Wilkinson TJ, et al. The association of muscle size, strength and exercise capacity with all-cause mortality in non-dialysis-dependent CKD patients. *Clin Physiol Funct Imaging* 2020; 40: 399-406. DOI: 10.1111/cpf.12655.
135. Wetmore JB, Roetker NS, Gilbertson DT, et al. Early withdrawal and non-withdrawal death in the months following hemodialysis initiation: A retrospective cohort analysis. *Hemodial Int* 2019; 23: 261-272. DOI: 10.1111/hdi.12723.
136. Xu X, Yang Z, Ma T, et al. The cut-off values of handgrip strength and lean mass index for sarcopenia among patients on peritoneal dialysis. *Nutr Metab (Lond)* 2020; 17: 84. DOI: 10.1186/s12986-020-00506-3.
137. Yadla M, John JP and Mummadi M. A study of clinical assessment of frailty in patients on maintenance hemodialysis supported by cashless government scheme. *Saudi journal of kidney diseases and transplantation : an official publication of the Saudi Center for Organ Transplantation, Saudi Arabia* 2017; 28: 15-22. 2017/01/18. DOI: 10.4103/1319-2442.198102.
138. Yamamoto S, Matsuzawa R, Hoshi K, et al. Modified Creatinine Index and Clinical Outcomes of Hemodialysis Patients: An Indicator of Sarcopenia? *J Ren Nutr* 2021; 31: 370-379. DOI: 10.1053/j.jrn.2020.08.006.
139. Yazawa M, Kido R, Ohira S, et al. Early Mortality Was Highly and Strongly Associated with Functional Status in Incident Japanese Hemodialysis Patients: A Cohort Study of the Large National Dialysis Registry. *PLoS One* 2016; 11: e0156951. DOI: 10.1371/journal.pone.0156951.
140. Zhang Q, Zhang J, Zhang W, et al. Risk factors for decreased upper-limb muscle strength and its impact on survival in maintenance hemodialysis patients. *Int Urol Nephrol* 2020; 52: 1143-1153. DOI: 10.1007/s11255-020-02468-0.

**Table S1.** Description of included studies, grouped by population studied

| Author, year            | Country         | Data Source        | Population description                                                                                                                    | Tools assessed                                                                                                                 | Outcomes reported            | Follow-Up Duration                   | N <sup>l</sup> | Age                     |
|-------------------------|-----------------|--------------------|-------------------------------------------------------------------------------------------------------------------------------------------|--------------------------------------------------------------------------------------------------------------------------------|------------------------------|--------------------------------------|----------------|-------------------------|
| <b>CKD Non-Dialysis</b> |                 |                    |                                                                                                                                           |                                                                                                                                |                              |                                      |                |                         |
| Chang, 2011             | Taiwan          | Prospective cohort | CKD stage 1-5, non-dialysis, aged 18-75, 1 center                                                                                         | HGS                                                                                                                            | Composite 1                  | up to 3 <sup>0¥</sup> years          | 128            | 60.7 ± 14.8             |
| Roshanravan, 2012       | USA             | Secondary analysis | CKD stage 1-4, non-dialysis, 2 centers                                                                                                    | Fried Frailty Index [modified exhaustion, low activity]; Weight Loss; Gait Speed; HGS; SF-36 Vitality Scale; Physical Activity | Composite 1                  | 967 (1-1752) <sup>§</sup> days       | 336            | 58.7 ± 13.0             |
| Roshanravan, 2013       | USA             | Secondary analysis | CKD stage 2-4, non-dialysis, 4 centers                                                                                                    | 6MWT; Gait Speed; TUG; HGS                                                                                                     | Mortality                    | 3 (2, 3.7)* years                    | 385            | 62 ± 13                 |
| de Goeij, 2014          | The Netherlands | Secondary analysis | CKD patients, incident pre-dialysis, 25 centers                                                                                           | IPQ-R: Weight Loss, Loss of Strength, and Fatigue components; SF-36 PCS                                                        | Kidney Function; Composite 1 | up to 0.5 <sup>0¥</sup> years        | 436            | 69 (56, 76)*            |
| Navaneethan, 2014       | USA             | Secondary analysis | CKD stage 1-4, non-dialysis, aged >20 years, from a nationally representative survey of the US civilian, non-institutionalized population | LTPA                                                                                                                           | Mortality                    | 4.5 ± 0.1 <sup>†¥</sup> person years | 2145           | 60.7 ± 0.7 <sup>†</sup> |

|                             |                 |                    |                                                                       |                                                                                              |                                                            |                              |      |                                                                                                           |
|-----------------------------|-----------------|--------------------|-----------------------------------------------------------------------|----------------------------------------------------------------------------------------------|------------------------------------------------------------|------------------------------|------|-----------------------------------------------------------------------------------------------------------|
| Ritchie, 2014               | United Kingdom  | Secondary analysis | CKD patients, non-dialysis, 1 center                                  | KPS                                                                                          | Mortality; Kidney Function                                 | 2.9 (1.5, 4.8)* years        | 1515 | KPS 100: 59.6 ± 15.7; KPS 90: 67.2 ± 12.7; KPS ≤80: 67.9 ± 13.1                                           |
| Robinson-Cohen, 2014        | USA             | Secondary analysis | CKD stage 3-4, non-dialysis, 2 centers                                | Four Week Physical Activity History Questionnaire                                            | Kidney Function                                            | 3.7 (-)* years               | 256  | >150 min/wk: 61.7 ± 12.5<br>60-150 min/wk: 61.7 ± 12<br>1-60 min/wk: 58.8 ± 12.8<br>0 min/wk: 61.8 ± 11.3 |
| Delgado, 2015 <sup>25</sup> | USA             | Secondary analysis | CKD stage 3-5, non-dialysis, aged 18-70, 15 centers                   | Frailty, self-report [modified Fried and Woods]                                              | Mortality                                                  | 17 (11, 18)* years           | 812  | 52 (42, 61)*                                                                                              |
| Mansur, 2015                | Brazil          | Prospective cohort | CKD stage 3-5, pre-dialysis, 1 center                                 | Johansen Frailty criteria [modified Fried and Woods]                                         | Composite 1                                                | 1 <sup>∅</sup> year          | 61   | 60.5 ± 11.5                                                                                               |
| Meulendijks, 2015           | The Netherlands | Prospective cohort | CKD patients visiting a pre-dialysis clinic, aged >65 years, 1 center | Groningen Frailty Indicator                                                                  | Mortality; Hospitalization; Dialysis-Related Complications | up to 1 <sup>∅</sup> year    | 63   | 75 (66, 92)*                                                                                              |
| Pereira, 2015               | Brazil          | Secondary analysis | CKD stage 3-5, non-dialysis, 1 center                                 | Sarcopenia Method A (MAMC+HGS); Sarcopenia Method B (SGA+HGS); Sarcopenia Method C (SMI+HGS) | Mortality                                                  | up to 3.3 <sup>∅</sup> years | 287  | 59.9 ± 10.5                                                                                               |

|               |                |                    |                                                                                                                                           |                                                                        |                                             |                                     |      |                                                                                                                                                                            |
|---------------|----------------|--------------------|-------------------------------------------------------------------------------------------------------------------------------------------|------------------------------------------------------------------------|---------------------------------------------|-------------------------------------|------|----------------------------------------------------------------------------------------------------------------------------------------------------------------------------|
| Pugh, 2016    | United Kingdom | Prospective cohort | CKD patients at risk of ESRD referred to pre-dialysis, 1 center                                                                           | CFS [adapted]                                                          | Mortality                                   | up to 3 <sup>◊</sup> years          | 283  | 74 (63, 81)*                                                                                                                                                               |
| Androga, 2017 | USA            | Secondary analysis | CKD stage 2-4, non-dialysis, aged >20 years, from a nationally representative survey of the US civilian, non-institutionalized population | ASMI; LTPA                                                             | Mortality                                   | 9.4 (7.8, 10.8)* <sup>¥</sup> years | 1101 | Nonsarcopenic, non-obese: 70.6 ± 1.0 <sup>†</sup> ; Sarcopenia only: 75.2 ± 1.1 <sup>†</sup> Obese only: 70.8 ± 0.8 <sup>†</sup> Sarcopenic-obese: 77.2 ± 1.0 <sup>†</sup> |
| Tsai, 2017    | Taiwan         | Prospective cohort | CKD stage 1-5, non-dialysis, 1 center                                                                                                     | HGS; 2-Minute Step; 30-Second Chair Stand                              | Hospitalization; CVD; Kidney Function       | 2.4 ± 0.9 <sup>¥</sup> years        | 161  | 67.2 ± 7.8                                                                                                                                                                 |
| Ali, 2018     | United Kingdom | Prospective cohort | CKD stage 4-5, non-dialysis, aged >65 years, 1 center                                                                                     | Combined PRISMA/TUG                                                    | Mortality; Kidney Function                  | 1.7 <sup>◊¥</sup> years             | 104  | Non-frail: 76.7 (65-87) <sup>‡</sup> ; Frail: 77.4 (65-92) <sup>‡</sup>                                                                                                    |
| Clarke, 2019  | United Kingdom | Prospective cohort | CKD stage 1-5, non-dialysis, aged >18 years, 1 center                                                                                     | Gait Speed [self-report]; Walking; DASI                                | Mortality                                   | 3.6 (3.5, 3.8)* <sup>¥</sup> years  | 450  | 62 (48, 75)*                                                                                                                                                               |
| Gregg, 2019   | USA            | Prospective cohort | CKD stage 2-5, non-dialysis, 1 center                                                                                                     | BDI-I - Fatigue; QIDS-SR <sub>16</sub> - Fatigue; SF-12 Vitality Scale | Composite 2                                 | 1 <sup>◊¥</sup> year                | 266  | 64 ± 12                                                                                                                                                                    |
| Veza, 2019    | Italy          | Prospective cohort | CKD stage 4-5, aged ≥65 years, 1 center                                                                                                   | Frailty Index                                                          | Mortality; Hospitalization; Kidney Function | 1 <sup>◊¥</sup> year                | 115  | 80.2 ± 6.3                                                                                                                                                                 |
| Kruse, 2020   | USA            | Secondary analysis | CKD patients, aged ≥65 years, 4 centers                                                                                                   | SMI                                                                    | Mortality; Kidney Function                  | 7 (-)* years                        | 351  | (-)                                                                                                                                                                        |

|                                     |                |                    |                                                                                                                                                                 |                                                                                                             |                                             |                              |       |                 |
|-------------------------------------|----------------|--------------------|-----------------------------------------------------------------------------------------------------------------------------------------------------------------|-------------------------------------------------------------------------------------------------------------|---------------------------------------------|------------------------------|-------|-----------------|
| Watson, 2020                        | United Kingdom | Secondary analysis | Combination of 2 study populations, CKD, non-dialysis, 1 center: Cohort 1, CKD stage 3b-4, aged $\geq 40$ years; Cohort 2, CKD stage 3b-5, aged $\geq 18$ years | Leg Extension Strength                                                                                      | Mortality; Hospitalization; Kidney Function | 3.3 $\pm$ 1.8 years          | 89    | 62.8 $\pm$ 11.0 |
| Rampersad, 2021                     | Canada         | Prospective cohort | CKD stage 4-5, non-dialysis, 4 centers                                                                                                                          | PASE                                                                                                        | Mortality; Kidney Function                  | 1193 <sup>◇</sup> days       | 579   | 72 (62, 82)*    |
| Incident Dialysis                   |                |                    |                                                                                                                                                                 |                                                                                                             |                                             |                              |       |                 |
| Hemodialysis                        |                |                    |                                                                                                                                                                 |                                                                                                             |                                             |                              |       |                 |
| Joly, 2003                          | France         | Hospital records   | HD, aged $>80$ years, 1 center                                                                                                                                  | KPS                                                                                                         | Mortality                                   | up to 12 <sup>◇</sup> years  | 107   | 83.2 $\pm$ 2.9  |
| Knight, 2003                        | USA            | Hospital records   | HD, aged $>20$ years, 782 centers                                                                                                                               | SF-36 PCS                                                                                                   | Mortality                                   | up to 2 <sup>◇</sup> years   | 14815 | 61.0 $\pm$ 15.4 |
| Argyropoulos, 2009                  | USA            | Secondary analysis | HD ( $<45$ days), 81 centers                                                                                                                                    | SF-36 PF Scale                                                                                              | Mortality                                   | up to 9 <sup>◇</sup> years   | 491   | 59.1 $\pm$ 14.5 |
| Hatakeyama, 2013                    | Japan          | Hospital records   | HD, aged $>80$ years, 1 center                                                                                                                                  | ECOG-PS                                                                                                     | Mortality                                   | up to 10 <sup>◇¥</sup> years | 141   | 84.2 $\pm$ 3.1  |
| Delgado, 2015 <sup>26</sup>         | USA            | Secondary analysis | HD patients with Medicare, 297 centers                                                                                                                          | Frailty, self report [modified Fried, Woods, Johansen]; Exhaustion; Adjusted Activity Score; SF-12 PF Scale | Serious Fall Injuries                       | 2.5 (1.0, 3.9)* years        | 1053  | 63 (52, 73)*    |
| McAdams-DeMarco, 2015 <sup>84</sup> | USA            | Secondary analysis | HD ( $<6$ months), 27 centers                                                                                                                                   | Fried Frailty Index                                                                                         | Mortality                                   | 1 <sup>◇</sup> year          | 324   | 54.8 $\pm$ 13.3 |

|                            |                |                    |                                                                    |                                             |                                     |                                    |       |                                                                  |
|----------------------------|----------------|--------------------|--------------------------------------------------------------------|---------------------------------------------|-------------------------------------|------------------------------------|-------|------------------------------------------------------------------|
| Yazawa, 2016               | Japan          | Registry data      | HD, from registry data capturing 99% of the HD facilities in Japan | Functional Status – Ability to Perform ADL  | Mortality                           | 1 <sup>◇</sup> year                | 7664  | 69 (59, 77)*                                                     |
| Lee, 2017                  | South Korea    | Prospective cohort | HD, aged >65 years, 1 center                                       | Multidimensional Frailty Score              | Composite 3                         | 1.5 (1.0, 1.8)* <sup>¥</sup> years | 46    | 71.5 (67.8, 76.3)*                                               |
| Plantinga, 2017            | USA            | Registry data      | HD patients with Medicare, aged 67-100 years, from USRDS database  | Functional Status – Form CMS-2728           | Serious Fall Injuries               | 1 <sup>◇</sup> year                | 81653 | 76.8 ± 6.5                                                       |
| Wetmore, 2019              | USA            | Registry data      | HD patients with Medicare, aged ≥18 years, from USRDS database     | Functional Status Score                     | Mortality; Withdrawal from Dialysis | 0.5 <sup>◇¥</sup> years            | 80284 | 71.7 ± 11.4                                                      |
| López-Montes, 2020         | Spain          | Prospective cohort | HD, aged ≥70 years, 1 center                                       | Fried Frailty Index [modified low activity] | Mortality                           | 1 <sup>◇¥</sup> year               | 117   | 78.1 ± 4.1                                                       |
| <b>Peritoneal Dialysis</b> |                |                    |                                                                    |                                             |                                     |                                    |       |                                                                  |
| Utas, 2001                 | Turkey         | Hospital records   | CAPD, 12 centers                                                   | KPS                                         | Mortality; Hospitalization          | 2.0 ± 1.5 <sup>¥</sup> years       | 334   | 42.2 ± 13.8                                                      |
| Shum, 2014                 | Hong Kong      | Hospital records   | PD, aged >65 years, 1 center                                       | Basic Activities of Daily Living            | Mortality; Hospitalization          | up to 8 <sup>◇</sup> years         | 157   | 73.8 ± 5.4                                                       |
| Xu, 2020                   | China          | Prospective cohort | CAPD (96.7%), 1 center                                             | Sarcopenia (LMI + HGS); HGS                 | Mortality                           | 3.0 ± (-) <sup>¥</sup> years       | 327   | 56.1 ± 15.0                                                      |
| <b>Both HD &amp; PD</b>    |                |                    |                                                                    |                                             |                                     |                                    |       |                                                                  |
| McClellan, 1991            | USA            | Prospective cohort | HD, CAPD (<6 weeks), 37 centers                                    | KPS                                         | Mortality                           | 479.6 ± 10.4 <sup>†</sup> days     | 294   | 56.6 ± 15.1                                                      |
| Chandna, 1999              | United Kingdom | Hospital records   | HD, PD, 1 center                                                   | KPS                                         | Mortality                           | up to 5.3 <sup>◇¥</sup> years      | 292   | 61.3 ± 15.8                                                      |
| Stenvinkel, 2002           | Sweden         | Secondary analysis | HD, CAPD, aged <70 years, 1 center                                 | HGS                                         | Mortality                           | 3.1 (0.1-6.9) <sup>‡¥</sup> years  | 169   | Men: 52.0 ± 1.0 <sup>†</sup> ;<br>Women: 52.0 ± 1.0 <sup>†</sup> |

|                      |        |                    |                                                    |                                                                                                               |                            |                                 |       |                                                  |
|----------------------|--------|--------------------|----------------------------------------------------|---------------------------------------------------------------------------------------------------------------|----------------------------|---------------------------------|-------|--------------------------------------------------|
| Lopez Revuelta, 2004 | Spain  | Prospective cohort | HD, PD, 34 centers                                 | KPS [modified]; SF-36 PCS                                                                                     | Mortality; Hospitalization | 771 (9-1259) <sup>§</sup> days  | 318   | Diabetic: 61.9 ± 13.6; Non-diabetic: 57.0 ± 16.5 |
| Johansen, 2007       | USA    | Secondary analysis | HD, PD, multiple centers                           | Johansen Frailty criteria [modified Fried and Woods]; SF-36 Vitality Scale; Physical Activity; SF-36 PF Scale | Mortality; Composite 3     | 1 <sup>◇</sup> year             | 2275  | 58.2 ± 15.5                                      |
| Bao, 2012            | USA    | Secondary analysis | HD, PD, 295 centers                                | Frailty, self report [modified Fried, Woods, Johansen]                                                        | Mortality; Hospitalization | 2.9 (2.25-4) <sup>§</sup> years | 1576  | 59.6 ± 14.2                                      |
| Arai, 2014           | Japan  | Hospital records   | HD, PD, aged >75 years, 1 center                   | Mobility – Criteria for Impaired Elderly                                                                      | Mortality                  | 0.5 ± 0.1 <sup>¥</sup> years    | 202   | 80.4 ± 4.3                                       |
| Hellberg, 2014       | Sweden | Hospital records   | HD, PD (<100 days), 1 center                       | HGS; Isometric quadriceps strength; Standing heel rise; Toe lift                                              | Mortality                  | 3.5 (-)* years                  | 134   | 60 ± 16                                          |
| Alfaadhel, 2015      | Canada | Prospective cohort | HD, PD, 1 center                                   | CFS                                                                                                           | Mortality                  | 1.7 (0.9, 2.8)* years           | 390   | 63 ± 15                                          |
| Shah, 2018           | USA    | Registry data      | HD, PD patients with Medicare, from USRDS database | Functional Status – Form CMS-2728                                                                             | Mortality                  | 1.8 ± 0.9 <sup>¥</sup> years    | 49645 | 72 ± 11                                          |



|                |                 |                    |                                                           |                                                                                                                                                                                                   |                            |                            |     |             |
|----------------|-----------------|--------------------|-----------------------------------------------------------|---------------------------------------------------------------------------------------------------------------------------------------------------------------------------------------------------|----------------------------|----------------------------|-----|-------------|
| Goto, 2019     | The Netherlands | Prospective cohort | HD, PD, aged $\geq 65$ years, 17 centers                  | Fried Frailty Index [modified low activity]; Geriatric Assessment; Groningen Frailty Indicator; TUG; Katz' ADL; Lawton and Brody's IADL Scale; Functional Status Score (ADL & IADL)               | Composite 4                | 0.5 <sup>⊙</sup> years     | 187 | 75 $\pm$ 7  |
| van Loon, 2019 | The Netherlands | Prospective cohort | HD/PD (<2 weeks), aged $\geq 65$ years, 17 centers        | Fried Frailty Index [modified low activity]; Geriatric Assessment; Groningen Frailty Indicator; Clinical Impression [physician]; Surprise Question; TUG; Katz' ADL; Lawton and Brody's IADL Scale | Mortality; Hospitalization | up to 1 <sup>⊙</sup> year  | 192 | 75 $\pm$ 7  |
| Unspecified    |                 |                    |                                                           |                                                                                                                                                                                                   |                            |                            |     |             |
| Isoyama, 2014  | Sweden          | Secondary analysis | Dialysis modality unspecified, aged 18-75 years, 1 center | Sarcopenia; HGS                                                                                                                                                                                   | Mortality                  | up to 5 <sup>⊙</sup> years | 330 | 54 $\pm$ 13 |

|                         |       |                    |                                                                                |                                                 |                            |                                   |       |                  |
|-------------------------|-------|--------------------|--------------------------------------------------------------------------------|-------------------------------------------------|----------------------------|-----------------------------------|-------|------------------|
| Inaguma, 2016           | Japan | Secondary analysis | Dialysis modality unspecified, aged >20 years, 17 centers                      | BI                                              | Mortality; CVD             | up to 1200 <sup>◇</sup> days      | 1496  | 67.4 ± 13.0      |
| <b>Chronic Dialysis</b> |       |                    |                                                                                |                                                 |                            |                                   |       |                  |
| <b>Hemodialysis</b>     |       |                    |                                                                                |                                                 |                            |                                   |       |                  |
| Roberts, 1976           | USA   | Prospective cohort | HHD, 12 centers                                                                | State of health                                 | Mortality                  | up to 6 <sup>◇</sup> years        | 981   | 39.7 ± 12.8      |
| Jones, 1991             | USA   | Prospective cohort | HD (>1 month), 7 centers                                                       | KPS                                             | Hospitalization            | 0.5 <sup>◇¥</sup> years           | 527   | >65 years: 31.8% |
| McClellan, 1992         | USA   | Registry data      | HD, aged >20 years, 31 centers                                                 | KPS                                             | Mortality                  | up to 1 <sup>◇</sup> year         | 3612  | 55.1 ± 14.8      |
| Kutner, 1994            | USA   | Secondary analysis | HD, aged >60 years, from a random sample drawn from the ESRD Network 20 census | Functional Limitations Score                    | Mortality                  | up to 2 <sup>◇</sup> years        | 287   | 68.7 ± 5.9       |
| DeOreo, 1997            | USA   | Prospective cohort | HD, 3 centers                                                                  | SF-36 PCS                                       | Mortality; Hospitalization | 531 ± 231 days                    | 1000  | 58.2 ± 15.4      |
| Ifudu, 1998             | USA   | Prospective cohort | HD (>6 months), 8 centers                                                      | KPS [modified]                                  | Mortality                  | up to 3 <sup>◇</sup> years        | 522   | 60 ± 15          |
| Lowrie, 2003            | USA   | Hospital records   | HD, multiple centers                                                           | SF-36 PCS                                       | Mortality; Hospitalization | 0.5 <sup>◇¥</sup> years           | 13592 | 59.0 ± 15.4      |
| Mapes, 2003             | USA   | Secondary analysis | HD patients, 314 international centers                                         | SF-36 Vitality Scale; SF-36 PCS; SF-36 PF Scale | Mortality; Hospitalization | (-)                               | 10030 | 58.9 ± 14.9      |
| Takaki, 2005            | Japan | Prospective cohort | HD (>3 months), 4 centers                                                      | SF-36 Vitality Scale; SF-36 PCS; SF-36 PF Scale | Mortality                  | 986 ± 264 days                    | 490   | 60.3 ± 11.5      |
| Koyama, 2010            | Japan | Prospective cohort | HD, 3 centers                                                                  | Fukuda Fatigue Scale                            | Mortality; CVD             | 2.2 (0.1-2.2) <sup>§¥</sup> years | 788   | 61.8 ± 10.7      |

|                                     |        |                    |                                        |                                 |                            |                                    |       |                          |
|-------------------------------------|--------|--------------------|----------------------------------------|---------------------------------|----------------------------|------------------------------------|-------|--------------------------|
| Noori, 2010                         | USA    | Secondary analysis | HD (>8 weeks), 8 centers               | MAMC                            | Mortality                  | 730 (-)* days                      | 792   | 54 ± 15                  |
| Peng, 2010                          | Taiwan | Prospective cohort | HD (>3 months), 14 centers             | SF-36 PCS                       | Mortality                  | up to 7 <sup>◇</sup> years         | 888   | 57.9 ± 13.1 <sup>†</sup> |
| Tentori, 2010                       | USA    | Secondary analysis | HD, 626 international centers          | Exercise Frequency              | Mortality; Hospitalization | 1.75 (-)* years                    | 20920 | 60.7 ± 14.8              |
| Jhamb, 2011                         | USA    | Secondary analysis | HD (>3 months), aged 18-80, 15 centers | SF-36 Vitality Scale            | Mortality; CVD             | 2.84 ± 1.84 years                  | 1798  | 57.5 ± 14.0              |
| Kohl, 2012                          | Brazil | Prospective cohort | HD (>6 months), 1 center               | 6MWT                            | Mortality                  | up to 12 <sup>◇</sup> years        | 52    | 37 ± 11                  |
| Santos, 2012                        | Brazil | Prospective cohort | HD (>3 months), 1 center               | SF-36 PF Scale                  | Mortality                  | 1 <sup>◇</sup> year                | 161   | 44.5 ± 15.6              |
| Farrokhi, 2013                      | Canada | Secondary analysis | HD, aged >65 years, 1 center           | 4-Item Essential ADL Score      | Mortality                  | up to 5 <sup>◇</sup> years         | 167   | 74.8 ± 5.9               |
| McAdams-DeMarco, 2013 <sup>83</sup> | USA    | Prospective cohort | HD, 1 center                           | Fried Frailty Index             | Mortality; Hospitalization | 3.0 (2.4, 3.1)* years              | 146   | 60.6 ± 13.6              |
| Peng, 2013                          | Taiwan | Prospective cohort | HD (>3 months), 14 centers             | SF-36 PCS                       | Mortality                  | up to 7 <sup>◇</sup> years         | 816   | 57.8 ± 13.1              |
| Lopes, 2014                         | Brazil | Secondary analysis | HD, multiple international centers     | RAPA                            | Mortality                  | 1.6 (0.9, 2.5)* years              | 5763  | 63.4 ± 14.5              |
| Matos, 2014                         | Brazil | Secondary analysis | HD, 4 centers                          | HGS                             | Mortality                  | 2.8 (2.0, 3.8)* <sup>¥</sup> years | 443   | 46.61 ± 14.09            |
| Matsuzawa, 2014                     | Japan  | Prospective cohort | HD, 1 center                           | Lower extremity muscle strength | Mortality                  | 3.0 (0.2-7.0) <sup>‡¥</sup> years  | 190   | 64 (57, 72)*             |
| Shavit, 2014                        | Israel | Prospective cohort | HD, 1 center                           | Katz' ADL                       | Mortality                  | 1 <sup>◇</sup> year                | 56    | 65.0 ± 17.8              |

|                |        |                    |                                    |                                                                                    |                                                      |                                    |      |                                                                                                                                           |
|----------------|--------|--------------------|------------------------------------|------------------------------------------------------------------------------------|------------------------------------------------------|------------------------------------|------|-------------------------------------------------------------------------------------------------------------------------------------------|
| Bossola, 2015  | Italy  | Prospective cohort | HD (>6 months), 1 center           | SF-36 Vitality Scale                                                               | Mortality                                            | 3.6 ± 2.6 <sup>¥</sup> years       | 126  | Dead: 70.1 ± 11.1; Alive: 60.5 ± 15.2                                                                                                     |
| Kutner, 2015   | USA    | Secondary analysis | HD (>3 months), 14 centers         | Gait Speed                                                                         | Mortality; Hospitalization                           | up to 3.3 <sup>◊¥</sup> years      | 752  | ≥1.0 m/s: 50 ± 12.7<br>0.8 to <1.0 m/s: 56.8 ± 13.5<br>0.6 to <0.8 m/s: 60.1 ± 13.4<br><0.6 m/s: 65 ± 12.9<br>Unable to walk: 64.7 ± 12.9 |
| Bossola, 2016  | Italy  | Prospective cohort | HD (>6 months), 1 center           | Katz' ADL; Lawton and Brody's IADL scale                                           | Mortality                                            | up to 7.5 <sup>◊¥</sup> years      | 132  | 62 ± 15                                                                                                                                   |
| Jassal, 2016   | Canada | Secondary analysis | HD, multiple international centers | Functional Status Score (ADL & IADL)                                               | Mortality; Hospitalization; Withdrawal from Dialysis | 1.4 (0.7, 2.4) <sup>*¥</sup> years | 7226 | 63.6 ± 14.4                                                                                                                               |
| Johansen, 2016 | USA    | Secondary analysis | HD (>3 months), 14 centers         | Fried Frailty Index; Fried Frailty Index [modified slowness, weakness, exhaustion] | Mortality                                            | 1.7 (1.4, 2.4) <sup>* years</sup>  | 762  | 57.1 ± 14.2                                                                                                                               |
| Ren, 2016      | China  | Prospective cohort | HD (>6 months), 1 center           | Sarcopenia Method C (SMI+HGS)                                                      | Mortality                                            | 1 <sup>◊</sup> year                | 131  | 49.4 ± 11.7                                                                                                                               |
| Bancu, 2017    | Spain  | Prospective cohort | HD, 3 centers                      | Fried Frailty Index + Dialysis Time/Week                                           | Mortality; Hospitalization                           | 1 <sup>◊</sup> year                | 320  | 70.26 ± 13.85                                                                                                                             |

|                               |                 |                    |                                                                                        |                                                                                                                                                                       |                            |                                    |      |                                                                |
|-------------------------------|-----------------|--------------------|----------------------------------------------------------------------------------------|-----------------------------------------------------------------------------------------------------------------------------------------------------------------------|----------------------------|------------------------------------|------|----------------------------------------------------------------|
| Fukuma, 2017                  | Japan           | Secondary analysis | HD (>6 months), aged >65 years, single country data from an international cohort study | SF-12 PF Scale                                                                                                                                                        | Mortality                  | 1 <sup>◇</sup> year                | 1376 | Derivation cohort: 71.6 ± 5.1<br>Validation cohort: 71.9 ± 5.6 |
| Kim, 2017                     | South Korea     | Prospective cohort | HD (>3 months), 3 centers                                                              | Sarcopenia Status; HGS                                                                                                                                                | Mortality; CVD             | 4.3 ± 0.8 years                    | 142  | 59.8 ± 13.1                                                    |
| Kittiskulnam, 2017            | USA             | Secondary analysis | HD (>3 months), 14 centers                                                             | Sarcopenia (Muscle Mass/Height <sup>2</sup> , BW, BSA, or BMI + Weakness); Sarcopenia (Muscle Mass/Height <sup>2</sup> , BW, BSA, or BMI + Slowness); Gait Speed; HGS | Mortality                  | 1.9 (0.1-3.2) <sup>‡</sup> years   | 645  | 56.7 ± 14.5                                                    |
| Shi, 2017                     | China           | Prospective cohort | HD (>3 months), 1 center                                                               | 6MWT                                                                                                                                                                  | Mortality; Peritonitis     | 2.0 (1.4, 2.3) <sup>*¥</sup> years | 145  | 55.0 ± 13.0                                                    |
| van Loon, 2017 <sup>126</sup> | The Netherlands | Secondary analysis | HD (>2 months), 29 centers                                                             | SF-36 PF Scale                                                                                                                                                        | Mortality; Transplantation | 2 <sup>◇</sup> years               | 679  | 64.1 ± 13.7                                                    |
| van Loon, 2017 <sup>127</sup> | The Netherlands | Secondary analysis | HD (>2 months), 29 centers                                                             | SF-36 Vitality Scale; SF-36 PF Scale                                                                                                                                  | Mortality                  | 2 <sup>◇</sup> years               | 714  | 64 ± 14                                                        |
| Yadla, 2017                   | India           | Prospective cohort | HD (>6 months), 1 center                                                               | Fried Frailty Index                                                                                                                                                   | Mortality; Hospitalization | 1 <sup>◇</sup> year                | 205  | 44.95 ± 13.27                                                  |

|                 |        |                    |                                                                                                                     |                                                 |                            |                                    |      |                    |
|-----------------|--------|--------------------|---------------------------------------------------------------------------------------------------------------------|-------------------------------------------------|----------------------------|------------------------------------|------|--------------------|
| Giglio, 2018    | Brazil | Prospective cohort | HD (>3 months), aged >60 years, 6 centers                                                                           | Sarcopenia [modified]; HGS                      | Mortality; Hospitalization | 1.5 (1.0, 2.6)* <sup>¥</sup> years | 170  | 70.6 ± 7.2         |
| Rymarz, 2018    | Poland | Prospective cohort | HD (>3 months), 1 center                                                                                            | LTI                                             | Mortality                  | 2.5 ± 1.7 <sup>¥</sup> years       | 48   | 59.83 ± 15.54      |
| Shimoda, 2018   | Japan  | Hospital records   | HD, 1 center                                                                                                        | Combined Score                                  | Mortality                  | up to 6.5 <sup>◊</sup> years       | 314  | 66.4 ± 11.2        |
| Hall, 2019      | USA    | Registry data      | HD (≥ 6 months), aged ≥65 years, from a nationally representative sample assembled by a large dialysis organization | SF-12 PCS                                       | Mortality                  | 151 (-)* days                      | 1371 | 79.9 ± 4.5         |
| Kalantar, 2019  | USA    | Secondary analysis | HD (>4 weeks), aged ≥18 years, 18 centers                                                                           | SF-36 Vitality Scale; SF-36 PCS; SF-36 PF Scale | Mortality                  | up to 6 <sup>◊</sup> years         | 753  | 55 ± 14            |
| Kuki, 2019      | Japan  | Prospective cohort | HD (>3 months), aged ≥20 years, 4 centers                                                                           | Gait Speed; HGS                                 | CVD                        | 2 (-)* years                       | 173  | 69.0 (62.5, 76.0)* |
| Kurita, 2019    | Japan  | Secondary analysis | HD, single country data from an international cohort study, up to 120 centers                                       | SF-12 Vitality Scale                            | Mortality; Composite 5     | 2.7 (-)* years                     | 3667 | 62.9 ± 12.1        |
| Matsuzawa, 2019 | Japan  | Secondary analysis | HD, aged ≥18 years, single country data from an international cohort study, multiple centers                        | Functional Status Score (ADL & IADL)            | Mortality                  | 704 (642, 722)* days               | 817  | 62.3 ± 11.9        |

|                  |             |                    |                                           |                                                                                        |             |                              |     |                                                                                                                                                                           |
|------------------|-------------|--------------------|-------------------------------------------|----------------------------------------------------------------------------------------|-------------|------------------------------|-----|---------------------------------------------------------------------------------------------------------------------------------------------------------------------------|
| Mori, 2019       | Japan       | Prospective cohort | HD (>1 year), 1 center                    | Sarcopenia                                                                             | Mortality   | 6.3 ± 2.9 <sup>‡</sup> years | 308 | Without sarcopenia: 54.4 ± 11.0<br>With sarcopenia: 63.5 ± 11.0                                                                                                           |
| Sy, 2019         | USA         | Secondary analysis | HD, aged ≥18 years, 14 centers            | Fried Frailty Index                                                                    | Mortality   | 2 <sup>◇</sup> years         | 746 | 57.2 ± 14.2                                                                                                                                                               |
| Torino, 2019     | Italy       | Prospective cohort | HD, aged ≥75 years, 35 centers            | SF-36 Vitality Scale; SF-36 PF Scale                                                   | Mortality   | 2.2 (1.3, 3.3)* years        | 245 | 81 ± 4                                                                                                                                                                    |
| Valenzuela, 2019 | Spain       | Prospective cohort | HD, male only, 3 centers                  | 6MWT; HGS; 30-Second Chair Stand                                                       | Mortality   | 1.5 <sup>◇‡</sup> years      | 30  | 71 ± 9                                                                                                                                                                    |
| Chao, 2020       | Taiwan      | Prospective cohort | HD, aged ≥20 years, 1 center              | Laboratory Deficit-Based Frailty Index – 1; Laboratory Deficit-Based Frailty Index – 2 | Mortality   | 2.7 ± 0.5 <sup>‡</sup> years | 33  | 69.5 ± 9.4                                                                                                                                                                |
| Jafari, 2020     | Canada      | Prospective cohort | HD (>6 months), aged >18 years, 2 centers | Fried Frailty Index [modified low activity]                                            | Mortality   | 1 <sup>◇</sup> year          | 97  | 62.9 ± 15.4                                                                                                                                                               |
| Lee, 2020        | South Korea | Secondary analysis | HD (>3 months), aged >18 years, 6 centers | Physical Performance                                                                   | Composite 5 | 2.1 ± (-) <sup>‡</sup> years | 277 | Normal gait speed and HGS: 58.6 ± 14.3<br>Normal gait speed and Low HGS: 61.5 ± 11.1<br>Low gait speed and Normal HGS: 63.7 ± 10.3<br>Low gait speed and HGS: 68.6 ± 12.0 |

|                            |             |                    |                                          |                                                                        |                                                               |                                   |     |                    |
|----------------------------|-------------|--------------------|------------------------------------------|------------------------------------------------------------------------|---------------------------------------------------------------|-----------------------------------|-----|--------------------|
| Lin, 2020 <sup>72</sup>    | Taiwan      | Prospective cohort | HD (>3 months), aged >20 years, 1 center | SARC-F                                                                 | Mortality                                                     | 2 <sup>◊</sup> years              | 271 | 64.4 ± 14.3        |
| Lin, 2020 <sup>73</sup>    | Taiwan      | Prospective cohort | HD (>3 months), aged >20 years, 1 center | Sarcopenia (SMI + HGS/Gait Speed); Gait Speed; HGS                     | Mortality; Hospitalization; Composite 3                       | 3 <sup>◊</sup> years              | 126 | 63.2 ± 13.0        |
| Souweine, 2020             | France      | Prospective cohort | HD (>3 months), multiple centers         | Sarcopenia (CrI + MVF); Dynapenia; Voorrips Score                      | Mortality                                                     | 2.0 (1.4-2.9) <sup>‡‡</sup> years | 187 | 65.3 ± 16.7        |
| Song, 2020                 | South Korea | Prospective cohort | HD (>3 months), 1 center                 | Sarcopenia Status                                                      | Mortality; CVD                                                | 5.2 ± (-) years                   | 88  | 60.6 ± 13.5        |
| Zhang, 2020                | China       | Prospective cohort | HD (>3 months), aged ≥18 years, 1 center | Biceps Muscle Strength                                                 | Mortality; CVD                                                | 1 <sup>◊‡</sup> year              | 174 | 63.1 ± 12.3        |
| Watanabe, 2021             | Japan       | Prospective cohort | HD, 1 center                             | ADL Difficulty                                                         | Mortality                                                     | 4.8 (2.6, 7.7)* years             | 300 | 65.0 (57.3, 72.0)* |
| Yamamoto, 2021             | Japan       | Hospital records   | HD (>3 months), 2 centers                | Sarcopenia (CrI + HGS); Sarcopenia (CrI + Gait Speed); Gait Speed; HGS | Mortality; Composite 5                                        | 3.0 (1.5, 5.7)* years             | 542 | 65.3 ± 12.1        |
| <b>Peritoneal Dialysis</b> |             |                    |                                          |                                                                        |                                                               |                                   |     |                    |
| Anderson, 1990             | USA         | Hospital records   | CAPD (>2 weeks), 1 center                | Activity of Daily Living Score                                         | Mortality                                                     | 1 <sup>◊‡</sup> year              | 44  | 64.5 ± 11          |
| Anderson, 1997             | USA         | Hospital records   | CAPD, 1 center                           | Activity of Daily Living Score                                         | Mortality; Peritonitis; Discharge from Assisted Care Facility | 1.1 ± 1.4 <sup>‡</sup> years      | 109 | 62.7 ± 12.8        |
| Wang, 2005                 | Hong Kong   | Prospective cohort | CAPD (>3 months), 1 center               | HGS                                                                    | Mortality; CVD                                                | 2.5 ± 1.2 <sup>‡</sup> years      | 233 | 55 ± 12            |



|                         |             |                    |                                                    |                                                                    |                                              |                                    |      |                                            |
|-------------------------|-------------|--------------------|----------------------------------------------------|--------------------------------------------------------------------|----------------------------------------------|------------------------------------|------|--------------------------------------------|
| Wang, 2010              | Hong Kong   | Prospective cohort | PD (>3 months), 1 center                           | HGS                                                                | CVD                                          | 4 <sup>◇</sup> years               | 218  | 56 ± 12                                    |
| Kang, 2013              | South Korea | Prospective cohort | CAPD, 1 center                                     | LTLM; ASMI                                                         | Mortality                                    | 3.7 ± 3.1 <sup>¥</sup> years       | 534  | 53.2 ± 14.1                                |
| Turkmen, 2014           | Turkey      | Prospective cohort | PD, aged 17-84, 3 centers                          | SF-36 PCS                                                          | Mortality                                    | up to 7 <sup>◇</sup> years         | 63   | Survived: 43.6 ± 14.6; Died: 56.6 ± 15     |
| de Oliveira, 2016       | Brazil      | Prospective cohort | PD (>3 months), 2 centers                          | SF-36 PF Scale                                                     | Mortality                                    | 2 <sup>◇</sup> years               | 76   | >60 years: 57.9%<br><59 years: 42.1%       |
| Ng, 2016                | Hong Kong   | Prospective cohort | PD, 1 center                                       | FQ                                                                 | Mortality; Hospitalization; CVD; Peritonitis | 1.9 ± 0.6 <sup>¥</sup> years       | 193  | 60.6 ± 12.1                                |
| Jin, 2017               | China       | Prospective cohort | CAPD (>1 month), 1 center                          | RASM                                                               | Mortality                                    | 5.0 ± 2.0 <sup>¥</sup> years       | 117  | 60.75 ± 12.24                              |
| Kamijo, 2018            | Japan       | Prospective cohort | PD (>2 months), aged >20 years, 1 center           | CFS [adapted]; Sarcopenia (RASM + HGS/Gait Speed); Gait Speed; HGS | Mortality                                    | 589.2 ± (-) days                   | 119  | 66.8 ± 13.2                                |
| Tennankore, 2019        | Canada      | Secondary analysis | PD, aged ≥18 years, multiple international centers | Functional Status Score (ADL & IADL)                               | Mortality                                    | 1.2 (0.7, 2.0)* <sup>¥</sup> years | 2593 | 60.7 ± 14.2                                |
| Chan, 2020              | Hong Kong   | Prospective cohort | PD, 1 center                                       | FQ                                                                 | Mortality; Hospitalization; CVD              | 2 <sup>◇</sup> years               | 267  | Not Frail: 61.1 ± 11.8; Frail: 64.2 ± 12.2 |
| <b>Both HD &amp; PD</b> |             |                    |                                                    |                                                                    |                                              |                                    |      |                                            |
| Anderson, 1993          | USA         | Prospective cohort | HD, PD, 73 centers                                 | Activity of Daily Living Score                                     | Mortality                                    | up to 2.2 <sup>◇¥</sup> years      | 228  | 65.5 ± 14.2                                |

|                 |        |                    |                                                  |                                                       |                                                                             |                             |       |                                                                                        |
|-----------------|--------|--------------------|--------------------------------------------------|-------------------------------------------------------|-----------------------------------------------------------------------------|-----------------------------|-------|----------------------------------------------------------------------------------------|
| Kutner, 1997    | USA    | Secondary analysis | HD, PD, aged >60 years, 58 centers               | Exercise Activity Score; Functional Limitations Score | Mortality                                                                   | 7 <sup>◇</sup> years        | 349   | Survivors: 66.5 ± 5.6; Non-survivors: 69.1 ± 6.0                                       |
| Bordenave, 1998 | USA    | Hospital records   | HD, PD, 1 center                                 | ADL                                                   | Withdrawal from Dialysis                                                    | up to 21 <sup>◇</sup> years | 304   | Age at time of death – Withdrawal deaths: 67 ± 11<br>Other deaths: 61 ± 11             |
| Freedman, 2001  | USA    | Secondary analysis | HD, PD, patients with Medicare, multiple centers | KPS [modified]                                        | Mortality                                                                   | up to 5 <sup>◇</sup> years  | 3442  | 18-49.4 years: 25.5%; 49.5-61.7 years: 24.7%; 61.8-70.9 years: 25.3%; 71+ years: 24.5% |
| Jhamb, 2009     | USA    | Secondary analysis | HD, PD, 81 centers                               | SF-36 Vitality Scale                                  | Mortality                                                                   | 1065 (-)* days              | 917   | 57.9 ± 14.8                                                                            |
| Lacson, 2010    | USA    | Hospital records   | HD, PD, multiple centers                         | SF-36 PCS; SF-12 PCS                                  | Mortality; Hospitalization                                                  | up to 1 <sup>◇</sup> year   | 44395 | 61.2 ± 15.1                                                                            |
| Sood, 2011      | Canada | Hospital records   | HD, PD, hospitalized patients, 11 centers        | Katz' ADL                                             | Mortality; Discharge to Assisted Care Facility; Composite 6; Discharge Home | 7.5 (3.9, 17.2)* days       | 1286  | <65 years: 62.4%<br>66-80 years: 29.2%<br>>80 years: 8.3%                              |
| Torino, 2014    | Italy  | Secondary analysis | HD, PD (>6 months), multiple centers             | 6MWT                                                  | Mortality; Hospitalization; CVD; Composite 3                                | 3.3 (2.7, 3.5)* years       | 296   | 65 ± 13                                                                                |
| Vogt, 2016      | Brazil | Hospital records   | HD, PD (>3 months), 1 center                     | HGS                                                   | Mortality                                                                   | up to 3 <sup>◇¥</sup> years | 265   | 59 ± 15.2                                                                              |

|                          |             |                    |                                                |                                                                                                                                                                                                                                                        |                            |                                        |      |                                                                       |
|--------------------------|-------------|--------------------|------------------------------------------------|--------------------------------------------------------------------------------------------------------------------------------------------------------------------------------------------------------------------------------------------------------|----------------------------|----------------------------------------|------|-----------------------------------------------------------------------|
| Kang, 2017 <sup>55</sup> | South Korea | Secondary analysis | HD, PD (>6 months), aged >20 years, 27 centers | Johansen Frailty Criteria [modified weight loss]; Disability; SF-36 PCS                                                                                                                                                                                | Mortality; Hospitalization | HD: 489 ± 116 days; PD: 467 ± 104 days | 1616 | HD: 56.4 ± 13.2; PD: 54.1 ± 11.9                                      |
| Kang, 2017 <sup>54</sup> | South Korea | Secondary analysis | HD, PD (>6 months), aged >20 years, 27 centers | Physical Activity – WHO Recommendations                                                                                                                                                                                                                | Mortality; CVD             | 500 <sup>o</sup> days                  | 1611 | Active: 57.3 ± 11.6; Intermediate: 56.1 ± 12.2; Inactive: 56.1 ± 12.2 |
| Lee, 2017                | South Korea | Prospective cohort | HD, PD (>6 months), aged >20 years, 27 centers | Johansen Frailty Criteria [modified weight loss]; Disability                                                                                                                                                                                           | Mortality; Hospitalization | 1.4 (-)* <sup>‡</sup> years            | 1658 | 55.9 ± 12.9                                                           |
| Brar, 2019               | Canada      | Prospective cohort | HHD, PD, 1 center                              | Fried Frailty Index [modified low activity]; Fried Frailty Index [modified low activity] + Clinical Impression [physician]; Clinical Impression [nurse]; Clinical Impression [physician]; SPPB; Weight Loss; Gait Speed; HGS; CES-D - Exhaustion; PASE | Mortality                  | 3.3 (2.5, 4.1)* years                  | 109  | Not Frail: 51 (43, 64)*; Frail: 64 (51, 73)*                          |
| Ducharlet, 2019          | Australia   | Prospective cohort | HD, PD (>3 months), 5 centers                  | POS-S Renal - Weakness; POS-S Renal - Mobility                                                                                                                                                                                                         | Mortality                  | 254 ± (-) days                         | 102  | 70 (-)*                                                               |

|                     |        |                    |                                                                                                                                                                 |                             |                                                                 |                         |         |                                                                                     |
|---------------------|--------|--------------------|-----------------------------------------------------------------------------------------------------------------------------------------------------------------|-----------------------------|-----------------------------------------------------------------|-------------------------|---------|-------------------------------------------------------------------------------------|
| Jegatheswaran, 2020 | Canada | Prospective cohort | HD, PD (>3 months), aged >18 years, 1 center                                                                                                                    | FRAIL Questionnaire         | Mortality; Hospitalization; Transplantation                     | 1.5 <sup>0¥</sup> years | 261     | 63.3 ± 15.6                                                                         |
| Jiang, 2020         | China  | Registry data      | HD, PD, aged >18 years, from a national inpatient care database                                                                                                 | Frailty (Johns Hopkins ACG) | Mortality; Hospitalization; Discharge to Assisted Care Facility | (-)                     | 1424026 | (-)                                                                                 |
| Unspecified         |        |                    |                                                                                                                                                                 |                             |                                                                 |                         |         |                                                                                     |
| Brito, 2020         | Brazil | Prospective cohort | Dialysis modality unspecified (>3 months), aged ≥18 years, 12 centers                                                                                           | SF-36 PCS; SF-36 PF Scale   | Mortality                                                       | 9 <sup>0</sup> years    | 670     | 53.9 ± 15.2                                                                         |
| Other               |        |                    |                                                                                                                                                                 |                             |                                                                 |                         |         |                                                                                     |
| Beddhu, 2009        | USA    | Secondary analysis | CKD stage 2-5, aged >20 years, from a nationally representative survey of the US civilian, non-institutionalized population                                     | LTPA                        | Mortality                                                       | 7 <sup>0</sup> years    | 907     | Recommended activity: 68 ± 1.1; Insufficient activity: 66 ± 1.1; Inactive: 73 ± 0.9 |
| Dai, 2017           | Sweden | Secondary analysis | CKD stage 1-5 non-dialysis (including LD transplant recipients) and CKD stage 5 dialysis (HD and PD) patients, derived from multiple prospective cohort studies | HGS                         | Mortality                                                       | 5 <sup>0¥</sup> years   | 985     | % HGS ≥75: 55 (32-70) <sup>¶</sup> ; % HGS <75: 64 (44-79) <sup>¶</sup>             |

|             |                |                    |                                  |               |                            |                      |     |                                              |
|-------------|----------------|--------------------|----------------------------------|---------------|----------------------------|----------------------|-----|----------------------------------------------|
| Nixon, 2020 | United Kingdom | Prospective cohort | CKD (non-dialysis), HD, 1 center | CFS [adapted] | Mortality; Hospitalization | 210 (203, 217)* days | 450 | Not Frail: 74 (63, 85)*; Frail: 81 (67, 95)* |
|-------------|----------------|--------------------|----------------------------------|---------------|----------------------------|----------------------|-----|----------------------------------------------|

Values are mean  $\pm$  standard deviation unless otherwise specified

\* Median (interquartile range); <sup>o</sup> Number; <sup>†</sup> Mean (standard error); <sup>‡</sup> Mean (range); <sup>§</sup> Median (range); <sup>¶</sup> Median (10<sup>th</sup>-90<sup>th</sup> percentile); <sup>¥</sup> converted to years (-) denotes missing values

<sup>1</sup>Some sample sizes represent our target population and therefore may be a subcategory of the total reported study population in studies.

**Abbreviations:** 6MWT, 6-Minute Walk Test; ADL, Activities of Daily Living; ASMI, Appendicular Skeletal Mass Index; BDI-I, Beck Depression Inventory-I; BI, Barthel Index; BMI, body mass index; BSA, body surface area; BW, body weight; CAPD, continuous ambulatory peritoneal dialysis; CES-D, Center for Epidemiologic Studies Depression Scale; CFS, Clinical Frailty Scale; CMS, Centers for Medicare & Medicaid Services; Composite 1, Mortality/Need for RRT; Composite 2, Mortality/Hospitalization/Need for RRT; Composite 3, Mortality/Hospitalization; Composite 4, Mortality/Functional Status Decline; Composite 5, Mortality/CVD; Composite 6, In-Hospital Mortality/Discharge to Assisted Care Facility; CrI, Creatinine Index; CKD, chronic kidney disease; CVD, cardiovascular disease; DASI, Duke Activity Status Index; ECOG, Eastern Cooperative Oncology Group Performance Status; ESRD, end-stage renal disease; FQ, Frailty Score; HD, hemodialysis; HGS, handgrip strength; HHD, home hemodialysis; IADL, Instrumental Activities of Daily Living; IPQ-R, Revised Illness Perception Questionnaire; KPS, Karnofsky Performance Status; LD, living donor; LMI, Lean Mass Index; LTI, Lean Tissue Index; LTLM, limb/trunk lean mass ratio; LTPA, Leisure Time Physical Activity; MAMC, midarm muscle circumference; MVF, Maximal Voluntary Force; PASE, Physical Activity Scale for the Elderly; PCS, Physical Component Summary; PD, peritoneal dialysis; PF, physical function; POS-S, Palliative Care Outcome Scale Symptoms; PRISMA, Program on Research for Integrating Services for the Maintenance of Autonomy; QIDS-SR<sub>16</sub>, Quick Inventory of Depressive Symptomology-Self Report; RAPA, Rapid Assessment of Physical Activity; RASM, relative appendicular skeletal muscle; RRT, renal replacement therapy; SGA, Subjective Global Assessment; SMI, Skeletal Muscle Index; SPPB, Short Physical Performance Battery; SF-12, 12-Item Short Form Survey; SF-36, 36-Item Short Form Survey; TUG, Timed Up-and-Go Test; USRDS, United States Renal Data System; WHO, World Health Organization.

**Table S2.** Description of frailty and functional status instruments

2A. Frailty Tools

| Tool                                                                              | Measurement method                                                                                                                                                                                                                                                                                                                                                                                                                                                                                                                                                                                                                                                                                                                                                                                                                                                                                                                                      | Criteria for Frailty                                                                                                  |
|-----------------------------------------------------------------------------------|---------------------------------------------------------------------------------------------------------------------------------------------------------------------------------------------------------------------------------------------------------------------------------------------------------------------------------------------------------------------------------------------------------------------------------------------------------------------------------------------------------------------------------------------------------------------------------------------------------------------------------------------------------------------------------------------------------------------------------------------------------------------------------------------------------------------------------------------------------------------------------------------------------------------------------------------------------|-----------------------------------------------------------------------------------------------------------------------|
| <b>Overall Frailty</b>                                                            |                                                                                                                                                                                                                                                                                                                                                                                                                                                                                                                                                                                                                                                                                                                                                                                                                                                                                                                                                         |                                                                                                                       |
| <b>Fried Frailty Index</b> <sup>49,83, 84, 116, 137</sup>                         | Frailty score with 5 domains; a score of 0 or 1 is given to each domain based on the following criteria:<br>Shrinking = self-report unintentional weight loss >10 pounds in the last year<br>Slowness = time to walk 15 feet, below an established cut-off by sex and height<br>Weakness = grip strength below an established cut-off based on sex and BMI<br>Exhaustion = self-report (questions about endurance and energy from CES-D scale)<br>Low activity = Minnesota Leisure Time Physical Activity questionnaire (kcal/week below an established cut-off)                                                                                                                                                                                                                                                                                                                                                                                        | Frail = 3 or higher<br>Not Frail = 0-2<br>[Alternatively: Not Frail (0-1), Intermediately Frail (2), and Frail (3-5)] |
| <b>Fried Frailty Index [modified low activity]</b> <sup>15, 33, 41, 76, 128</sup> | Frailty score with 5 domains; a score of 0 or 1 is given to each domain based on the following criteria:<br>Shrinking = self-report unintentional weight loss >10 pounds in the last year<br>Slowness = time to walk 13.1 feet, below an established cut-off by sex and height<br>Weakness = grip strength below an established cut-off based on sex and BMI<br>Exhaustion = self-report (questions about endurance and energy from CES-D scale)<br>Low activity <sup>†</sup> : various instruments including: <ul style="list-style-type: none"> <li>• Calcumed Instrument;</li> <li>• Paffenbarger Physical Activity Index Questionnaire; low activity = &lt;383kcal/week (male), &lt;270 kcal/week (female);</li> <li>• PASE questionnaire; low activity = &lt;383 kcal/week (male); &lt;270 kcal/week (female)</li> <li>• Self-report; low activity = last 3 months ≥ 4 hours sedentary lifestyle, no activities like cycling or running</li> </ul> | Frail = 3 or higher<br>Not Frail = 0-2<br>[Alternatively: Not Frail (0), Pre-Frail (1-2), and Frail (3-5)]            |

|                                                                                      |                                                                                                                                                                                                                                                                                                                                                                                                                                                                                                   |                                                           |
|--------------------------------------------------------------------------------------|---------------------------------------------------------------------------------------------------------------------------------------------------------------------------------------------------------------------------------------------------------------------------------------------------------------------------------------------------------------------------------------------------------------------------------------------------------------------------------------------------|-----------------------------------------------------------|
| <b>Fried Frailty Index [modified exhaustion, low activity]</b><br><small>103</small> | Frailty score with 5 domains; a score of 0 or 1 is given to each domain based on the following:<br>Shrinking = self-report unintentional weight loss >10 pounds in the last 6 months<br>Slowness = gait speed below 20th percentile for sex and height<br>Weakness = grip strength below an established cut-off based on sex and BMI<br>Exhaustion <sup>†</sup> = SF-36 Vitality Scale <37.5<br>Low activity <sup>†</sup> = self-report; physically inactive = exercising “never” or <1 time/week | Frail = 3 or higher<br>Not Frail = 0-2                    |
| <b>Fried Frailty Index [modified slowness, weakness, exhaustion]</b> <sup>49</sup>   | Frailty score with 4 domains (with the 5 standard components); 2 points for slowness/weakness and 1 point for each of the other criteria based on the following:<br>Shrinking = self-report unintentional weight loss >10 pounds in the last year<br>Slowness/weakness <sup>†</sup> = SF-36 PF Scale <75<br>Exhaustion <sup>†</sup> = SF-36 Vitality Scale <55<br>Low activity = Minnesota Leisure Time Physical Activity questionnaire (kcal/week below an established cut-off)                  | Frail = 3 or higher<br>Not Frail = 0-2                    |
| <b>Johansen Frailty Criteria [modified Fried and Woods]</b> <sup>48,78</sup>         | Frailty score with 4 domains (with the 5 standard components); 2 points for slowness/weakness and 1 point for each of the other criteria based on the following:<br>Shrinking <sup>†</sup> = classification as "undernourished" or “malnourished” by dialysis staff<br>Slowness/weakness <sup>†</sup> = SF-36 PF Scale <75<br>Exhaustion <sup>†</sup> = SF-36 Vitality Scale <55<br>Low activity <sup>†</sup> = self-report; inactive = exercising “almost never” or “never”                      | Frail = 3 or higher<br>Not Frail = 0-2                    |
| <b>Johansen Frailty Criteria [modified weight loss]</b> <sup>55,70</sup>             | Frailty score with 4 domains (with the 5 standard components); 2 points for slowness/weakness and 1 point for each of the other criteria based on the following:<br>Shrinking = self report unintentional weight loss >10 pounds in the last year<br>Slowness/weakness <sup>†</sup> = SF-36 PF Scale <75<br>Exhaustion <sup>†</sup> = SF-36 Vitality Scale <55<br>Low activity <sup>†</sup> = self-report; inactive = “almost never” or “never”                                                   | Frailty = 3 or higher<br>Pre-Frail = 1-2<br>Not Frail = 0 |

|                                                                                                   |                                                                                                                                                                                                                                                                                                                                                                                                                                                                                                                                                                                                                                            |                                                                                                                                                  |
|---------------------------------------------------------------------------------------------------|--------------------------------------------------------------------------------------------------------------------------------------------------------------------------------------------------------------------------------------------------------------------------------------------------------------------------------------------------------------------------------------------------------------------------------------------------------------------------------------------------------------------------------------------------------------------------------------------------------------------------------------------|--------------------------------------------------------------------------------------------------------------------------------------------------|
| <b>Frailty, self-report [modified Fried and Woods]<sup>25</sup></b>                               | Frailty score with 4 domains (with the 5 standard components); 2 points for slowness/weakness and 1 point for each of the other criteria based on the following:<br>Shrinking <sup>†</sup> = >5% of standard body weight loss at 1 year, to a weight of 75-95% of standard body weight<br>Slowness/weakness <sup>†</sup> = study specific questionnaire; ability to perform ADLs = lowest quartile<br>Exhaustion <sup>†</sup> = study specific questionnaire; lack of pep/energy; tiring easily = moderate or severe<br>Low activity = study specific Leisure Time Physical Activity questionnaire (kcal/week x kg in the lowest quartile) | Frail = 3 or higher<br>Intermediately Frail = 1-2<br>Not Frail = 0                                                                               |
| <b>Frailty, self report [modified Fried, Woods, Johansen]<sup>10,26</sup></b>                     | Frailty score with 3 domains; 1 point is allocated to each of the following criteria:<br>slowness/weakness <sup>†</sup> = SF-12 PF Scale <75<br>exhaustion <sup>†</sup> = participants answered "a little of the time" or "none of the time" when asked how often they felt they had a lot of energy during the past 4 weeks<br>low activity <sup>†</sup> = Adjusted Activity Score of the Human Activity Profile; lowest quintile for age and sex                                                                                                                                                                                         | Frail = 2-3<br>Not Frail = 0-1                                                                                                                   |
| <b>Fried Frailty Index + Dialysis Time/Week<sup>9</sup></b>                                       | Frailty score with the Fried Frailty Index, scored as normal. An additional component, dialysis time (hours/week), is applied afterwards and modifies the frailty designation.                                                                                                                                                                                                                                                                                                                                                                                                                                                             | Frail = 3 or higher AND greater than 12 hours of dialysis per week<br>Not Frail = 0-2 OR 3 or higher but less than 12 hours of dialysis per week |
| <b>Fried Frailty Index [modified low activity] + Clinical Impression [physician]<sup>15</sup></b> | Combined Fried Frailty Index (low activity measured using PASE) and physician impression of frailty.                                                                                                                                                                                                                                                                                                                                                                                                                                                                                                                                       | Frail = score 3 or higher on both tools                                                                                                          |



|                                                                   |                                                                                                                                                                                                                                                                                                                                                                                                                                                                                                                                                                                                                                                                                                                                           |                                                                                                                                                                                        |
|-------------------------------------------------------------------|-------------------------------------------------------------------------------------------------------------------------------------------------------------------------------------------------------------------------------------------------------------------------------------------------------------------------------------------------------------------------------------------------------------------------------------------------------------------------------------------------------------------------------------------------------------------------------------------------------------------------------------------------------------------------------------------------------------------------------------------|----------------------------------------------------------------------------------------------------------------------------------------------------------------------------------------|
| <b>Clinical Frailty Scale (CFS)</b> <sup>1</sup>                  | <p>Clinical judgement based on 7 categories, with each level increasing in degree of frailty:</p> <ol style="list-style-type: none"> <li>1. Very fit - robust, active, energetic, well motivated, and fit; fittest in their age group</li> <li>2. Well - without active disease but not as fit as those in Category 1</li> <li>3. Well- with treated comorbid disease</li> <li>4. Apparently vulnerable - not dependent, but has symptoms from comorbid disease (such as being slowed up)</li> <li>5. Mildly frail - limited dependence on others for IADLs</li> <li>6. Moderately frail - help is needed for IADLs and ADLs</li> <li>7. Severely frail - completely dependent on others for IADLs and ADLs, or terminally ill</li> </ol> | <p>Per one-category increase</p>                                                                                                                                                       |
| <b>Clinical Frailty Scale (CFS) [adapted]</b> <sup>53,91,97</sup> | <p>A modification of the CFS. Categories 1 through 6 are the same. Category 7 is divided into the following:</p> <ol style="list-style-type: none"> <li>7. Severely frail - Completely dependent for personal care, but seems stable and not at high risk of dying (within 6 months)</li> <li>8. Very severely frail – Completely dependent, approaching end of life; typically, could not recover even from a minor illness</li> <li>9. Terminally ill – Approaching the end of life; people with a life expectancy of &lt;6 months who are not otherwise evidently frail</li> </ol>                                                                                                                                                     | <p>Managing well = 1–3<br/> Vulnerable to mildly frail = 4–5<br/> Moderate to severe frailty= 6–8<br/> [Alternatively: Not Frail (1-4), Frail (5-8); or per one-category increase]</p> |
| <b>Clinical Impression [nurse]</b> <sup>15</sup>                  | <p>Nurse asked to indicate how frail the patient was on a 5-point Likert scale ranging from 0 (very fit) to 5 (very frail).</p>                                                                                                                                                                                                                                                                                                                                                                                                                                                                                                                                                                                                           | <p>Frail = 3 or higher<br/> Not Frail = 1-2</p>                                                                                                                                        |
| <b>Clinical Impression [physician]</b> <sup>15,128</sup>          | <p>Treating physician/nephrologist asked to indicate how frail the patient was on a 5-point Likert scale ranging from 0 (very fit) to 5 (very frail).</p>                                                                                                                                                                                                                                                                                                                                                                                                                                                                                                                                                                                 | <p>Frail = 3 or higher<br/> Not Frail = 1-2<br/> [Alternatively: a 10-point scale was used with Frailty = 5 or higher]</p>                                                             |

|                                                             |                                                                                                                                                                                                                                                                                                                                                                                                                                                                                                                                                                                                                                            |                                                                                                                  |
|-------------------------------------------------------------|--------------------------------------------------------------------------------------------------------------------------------------------------------------------------------------------------------------------------------------------------------------------------------------------------------------------------------------------------------------------------------------------------------------------------------------------------------------------------------------------------------------------------------------------------------------------------------------------------------------------------------------------|------------------------------------------------------------------------------------------------------------------|
| <b>Combined PRISMA / Timed Up-and-Go (TUG)</b> <sup>2</sup> | <p>Combination of PRISMA, a 7-item frailty questionnaire, and the TUG test (time needed to stand up and walk 3m).</p> <p>Components of PRISMA (1 point scored for each affirmative answer):</p> <p>Q1. Are you more than 85 years old?</p> <p>Q2. Male?</p> <p>Q3. Do you have any health problems that require you to limit your activity?</p> <p>Q4. Do you need someone to help you on a regular basis?</p> <p>Q5. Do you have any health problems that require you to stay at home?</p> <p>Q6. In case of need, can you count on someone close to you?</p> <p>Q7. Do you regularly use stick, walker, or wheelchair to get around?</p> | <p>Frail = PRISMA score <math>\geq 3</math><br/>AND a TUG time <math>\geq 8</math> seconds</p>                   |
| <b>Combined Score</b> <sup>110</sup>                        | <p>Frailty tool with 4 domains; malnutrition, slowness, and weakness assigned a score of 0-3 based on quartiles; inactivity is scored as either 0 (ADL independence) or 3 (any ADL dependence). Total score ranges from 0 (least frail) to 12 (most frail).</p> <p>Malnutrition = serum albumin</p> <p>Slowness = walking time over a 10m course</p> <p>Weakness = grip strength, stratified by sex</p> <p>Inactivity = dependence in any of the following: transfer to bed, chair, wheelchair, toilet, tub, shower; walking; stair climbing</p>                                                                                           | <p>Low score <math>&lt; 5</math><br/>[Alternatively: Per 1-point increase]</p>                                   |
| <b>Frailty Index</b> <sup>129</sup>                         | <p>A 38-item tool considering deficits in the following areas: cardiovascular, ADL, physical performance, mood, cognition, anthropometric measures, nutritional status, and biochemical parameters. Each item scored 0 (deficit absent) or 1 (deficit present). The Frailty Index was the ratio between the number of deficits presented and the total number of deficits considered.</p>                                                                                                                                                                                                                                                  | <p>Frail = <math>\geq 0.25</math></p>                                                                            |
| <b>Frailty (Johns Hopkins ACG)</b> <sup>46</sup>            | <p>Johns Hopkins adjusted clinical groups (ACG) frailty-defining diagnosis indicator is a binary variable based on ICD-9 codes and 12 clusters of frailty-defining diagnoses.</p> <p>In brief, the included ICD-9 codes were for nutritional marasmus, senile dementia, impairment (eyes), decubitus ulcer, incontinence (urine, feces), abnormal weight loss, lack of housing, difficulty walking, and falls.</p>                                                                                                                                                                                                                         | <p>Frail = meeting the criteria for any of the 12 clusters of frailty-defining diagnoses</p>                     |
| <b>Frailty Score (FQ)</b> <sup>17,90</sup>                  | <p>Frailty assessed by 30 dichotomous questions about personal health, psychological and physical state, body weight, ADLs, and mobility. Total score of 0-30.</p>                                                                                                                                                                                                                                                                                                                                                                                                                                                                         | <p>Not Frail = <math>\leq 5</math><br/>Mild = 6 to 8<br/>Moderate = 9 to 11<br/>Severely Frail = 12 or above</p> |

|                                                                        |                                                                                                                                                                                                                                                                                                                                                                                                                                                                                                                                                                                                                                                                                                                        |                                                                                                         |
|------------------------------------------------------------------------|------------------------------------------------------------------------------------------------------------------------------------------------------------------------------------------------------------------------------------------------------------------------------------------------------------------------------------------------------------------------------------------------------------------------------------------------------------------------------------------------------------------------------------------------------------------------------------------------------------------------------------------------------------------------------------------------------------------------|---------------------------------------------------------------------------------------------------------|
| <b>FRAIL Questionnaire</b><br><small>43</small>                        | 5 components, each scored 1 point:<br>Fatigue: are you too tired to exercise?<br>Resistance: can you climb one flight of stairs without assistance?<br>Aerobic: can you walk one block without assistance?<br>Illnesses: 5 or more illnesses (confirmed with medical records)<br>Loss of weight: >5% weight loss over the past year (obtained from medical records)                                                                                                                                                                                                                                                                                                                                                    | Frail = $\geq 3$<br>Pre-frail = 1-2<br>Not Frail = 0                                                    |
| <b>Geriatric Assessment</b><br><small>33, 128</small>                  | Measure of impairment in 7 domains using validated questionnaires/structured assessments. One point is given for each impaired domain (for a total out of 7) as follows:<br>(a) ADL (Katz): $\geq 1$ dependency<br>(b) IADL (Lawton and Brody): $\geq 1$ dependency<br>(c) Mobility (TUG): > 20s<br>(d) Cognitive: Mini-Mental State Examination: < 25; Clock Drawing Test: $\geq 10$ ; Enhanced Cued Recall: < 14; Fluency: < 5th percentile<br>(e) Depression (Geriatric Depression Scale): $\geq 5$<br>(f) Malnutrition (Mini Nutritional Assessment): $\leq 17$<br>(g) Comorbidity (Cumulative Illness Rating Scale - Geriatrics): $\geq 2 \times$ Score 3 or $\geq 1 \times$ Score 4 (renal comorbidity excluded) | Frail = $\geq 2$ impairments<br>Fit = < 2 impairments<br>[Alternatively: Frail ( $\geq 3$ impairments)] |
| <b>Groningen Frailty Indicator</b><br><small>33,87, 128</small>        | This is a 15-item tool, subdivided into four geriatric domains: physical functioning (mobility, ADLs, vision, hearing, and weight loss), cognitive functioning, social functioning (loneliness), and psychological functioning (anxiety, depression).                                                                                                                                                                                                                                                                                                                                                                                                                                                                  | Frail = $\geq 4$<br>Not Frail = < 4                                                                     |
| <b>Laboratory Deficit-Based Frailty Index - 1</b><br><small>20</small> | 23 laboratory items collected from routine hematology, biochemistry, and vital signs. Each item beyond the normal range is assigned one point. The scores for each item were summed and divided by the total number of items.                                                                                                                                                                                                                                                                                                                                                                                                                                                                                          | Frail/Not Frail groups determined by the mean score of the study cohort                                 |
| <b>Laboratory Deficit-Based Frailty Index - 2</b><br><small>20</small> | 32 laboratory items collected from routine hematology, biochemistry, urinalysis, and vital signs. Each item beyond the normal range is assigned one point. The scores for each item were summed and divided by the total number of items.                                                                                                                                                                                                                                                                                                                                                                                                                                                                              | Frail/Not Frail groups determined by the mean score of the study cohort                                 |

|                                                                   |                                                                                                                                                                                                                                                                                                                                                                                                                                                 |                                                                                                                                                                                                                                                                                             |
|-------------------------------------------------------------------|-------------------------------------------------------------------------------------------------------------------------------------------------------------------------------------------------------------------------------------------------------------------------------------------------------------------------------------------------------------------------------------------------------------------------------------------------|---------------------------------------------------------------------------------------------------------------------------------------------------------------------------------------------------------------------------------------------------------------------------------------------|
| <b>Multidimensional Frailty Score</b> <sup>69</sup>               | Frailty tool based on the Comprehensive Geriatric Assessment consisting of 9 items: (1) malignant disease, (2) Charlson Comorbidity Index, (3) serum albumin, (4) ADL (modified BI), (5) IADL (Lawton and Brody Index), (6) dementia (Mini-Mental State Examination), (7) risk of delirium (Nursing Delirium Screening), (8) malnutrition (Mini Nutritional Assessment), and (9) MAMC. Each item is scored 0-2 based on predetermined cut-offs. | Frail = 10 or higher<br>Not Frail = 0-9                                                                                                                                                                                                                                                     |
| <b>Short Physical Performance Battery (SPPB)</b> <sup>15</sup>    | A composite of balance, gait speed, and chair stand testing. Total score between 0-12, with higher scores indicating better function.                                                                                                                                                                                                                                                                                                           | Frail = 10 or less<br>Not Frail = 10-12                                                                                                                                                                                                                                                     |
| <b>Surprise Question</b> <sup>128</sup>                           | Clinicians were asked whether they would be surprised if the patients would die within 6 months after dialysis initiation.                                                                                                                                                                                                                                                                                                                      | Frail = answer NO to surprise question (“Not Surprised”)<br>Not Frail = answer YES (“Surprised”)                                                                                                                                                                                            |
| <b>Sarcopenia</b>                                                 |                                                                                                                                                                                                                                                                                                                                                                                                                                                 |                                                                                                                                                                                                                                                                                             |
| <b>Appendicular Skeletal Muscle Index (ASMI)</b> <sup>6, 56</sup> | Sum of both upper and lower extremities’ lean mass by the square of the height (kg/m <sup>2</sup> ) [measured by DXA].                                                                                                                                                                                                                                                                                                                          | Gender-based cut-offs established by young, healthy, reference population<br>Sarcopenia: ASMI = <7.26kg/m <sup>2</sup> (male)/5.5kg/m <sup>2</sup> (female)<br>[Alternatively: Categorized by tertiles; Lowest tertile = <6.54kg/m <sup>2</sup> (male) and <5.69kg/m <sup>2</sup> (female)] |
| <b>Lean Tissue Index (LTI)</b> <sup>105</sup>                     | Total lean tissue mass by the square of the height (kg/m <sup>2</sup> ) [measured by BIS]. The difference between the patient’s LTI and the 10 <sup>th</sup> percentile (by age and gender) of a reference population is calculated ( $\Delta$ LTI).                                                                                                                                                                                            | Sarcopenia = $\Delta$ LTI $\leq$ -1<br>Not sarcopenic = $\Delta$ LTI $\geq$ 0                                                                                                                                                                                                               |

|                                                                   |                                                                                                                                                                                                                                                                                                                                                                                                                                                                                                                  |                                                                                                                                                                                                                                                                     |
|-------------------------------------------------------------------|------------------------------------------------------------------------------------------------------------------------------------------------------------------------------------------------------------------------------------------------------------------------------------------------------------------------------------------------------------------------------------------------------------------------------------------------------------------------------------------------------------------|---------------------------------------------------------------------------------------------------------------------------------------------------------------------------------------------------------------------------------------------------------------------|
| <b>Limb/Trunk Lean Mass Ratio (LTLM)</b> <sup>56</sup>            | Sum of 4 limbs divided by trunk lean mass [measured by DXA].                                                                                                                                                                                                                                                                                                                                                                                                                                                     | Low LTLM tertile: <0.7943 (male), <0.7100 (female)<br>Middle LTLM tertile: 0.7943-0.8745 (male) and 0.7100-0.8116 (female)<br>High LTLM tertile: >0.8745 (male), >0.8116 (female)                                                                                   |
| <b>Midarm Muscle Circumference (MAMC)</b> <sup>92</sup>           | MAMC (cm) = midarm circumference (cm) – 3.142 x triceps skinfold thickness (TSF) (cm)<br>MAMC measured with plastic tape; TSF measured with calipers.                                                                                                                                                                                                                                                                                                                                                            | Quartiles of MAMC                                                                                                                                                                                                                                                   |
| <b>Relative Appendicular Skeletal Muscle (RASM)</b> <sup>47</sup> | Sum of both upper and lower extremities' muscle mass by the square of the height (kg/m <sup>2</sup> ) [measured by BIA].                                                                                                                                                                                                                                                                                                                                                                                         | Sarcopenia = Men: RASM <7.0 kg/m <sup>2</sup> ; Women: RASM <5.7 kg/m <sup>2</sup><br>No Sarcopenia = Men: RASM ≥7.0 kg/m <sup>2</sup> ; Women: RASM ≥5.7 kg/m <sup>2</sup>                                                                                         |
| <b>Skeletal Muscle Mass Index (SMI)</b> <sup>62</sup>             | Skeletal muscle mass calculated by the following equation:<br>SMI (kg) = ((height <sup>2</sup> /BIA-resistance x 0.401) + (sex x 3.825) + (age x -0.071)) + 5.102                                                                                                                                                                                                                                                                                                                                                | Normal: ≥10.76 kg/m <sup>2</sup> (male); ≥6.76 kg/m <sup>2</sup> (female)<br>Class I Sarcopenia: 8.51-10.75 kg/m <sup>2</sup> (male); 5.76-6.75 kg/m <sup>2</sup> (female)<br>Class II Sarcopenia: ≤8.50 kg/m <sup>2</sup> (male); ≤5.75 kg/m <sup>2</sup> (female) |
| <b>SARC-F</b> <sup>72</sup>                                       | 5-item self-report questionnaire:<br>(a) How much difficulty do you have in lifting and carrying 10 lbs?<br>(b) How much difficulty do you have with walking?<br>(c) How much difficulty do you have transferring from a chair or bed?<br>(d) How much difficulty do you have climbing a flight of 10 stairs?<br>(e) How many times have you fallen in the past year?<br>Each component was scored from 0 (no difficulty or no fall) to 2 (great difficulty or more than 4 falls). Total score between 0 and 10. | Sarcopenia: ≥ 1<br>[Alternatively, sarcopenia: ≥ 4]                                                                                                                                                                                                                 |

|                                                     |                                                                                                                                                                                                                                                                                                                                                |                                                                                                                                                                                                                      |
|-----------------------------------------------------|------------------------------------------------------------------------------------------------------------------------------------------------------------------------------------------------------------------------------------------------------------------------------------------------------------------------------------------------|----------------------------------------------------------------------------------------------------------------------------------------------------------------------------------------------------------------------|
| <b>Sarcopenia</b><br>40,88                          | <p>Sarcopenia = low muscle mass and low muscle strength (below sex specific cut-offs)</p> <p>Muscle mass: ASMI = the sum of lean soft tissue of the arms and legs by the square of the height (kg/m<sup>2</sup>) [measured by DXA]</p> <p>Muscle strength: HGS (i.e., the maximum value measured by a dynamometer using the dominant hand)</p> | <p>Gender-based cut-offs established by young, healthy, reference population. Cut-offs vary by geographic location.</p>                                                                                              |
| <b>Sarcopenia [modified]</b> <sup>32</sup>          | <p>Sarcopenia = low muscle mass and low muscle strength (below sex specific cut-offs)</p> <p>Muscle mass: ASMI = the sum of lean soft tissue of the arms and legs by the square of the height (kg/m<sup>2</sup>) [estimated by equation]</p> <p>Muscle strength: HGS</p>                                                                       | <p>Gender-based cut-offs established by young, healthy, reference population</p> <p>Sarcopenia: ASMI = &lt;7.26kg/m<sup>2</sup> (male)/5.45kg/m<sup>2</sup> (female) AND HGS = &lt;30kg (male)/&lt;20kg (female)</p> |
| <b>Sarcopenia (CrI + Gait Speed)</b> <sup>138</sup> | <p>Sarcopenia = low muscle mass and slowness</p> <p>Muscle mass: Creatinine Index (CrI) was calculated using the following formula:<br/>CrI (mg/kg/d) = 16.21 + 1.12 X [1 if male; 0 if female] – 0.06 X age (years) – 0.08 X single-pool Kt/Vurea + 0.009 X serum creatinine before dialysis (µmol/L).</p> <p>Slowness: gait speed</p>        | <p>Cut-offs determined by median of study cohort.</p> <p>Sarcopenia: CrI = &lt;20.8mg/kg/d AND gait speed = &lt;1.0m/s</p>                                                                                           |
| <b>Sarcopenia (CrI + HGS)</b> <sup>138</sup>        | <p>Sarcopenia = low muscle mass and weakness</p> <p>Muscle mass: CrI was calculated using the following formula:<br/>CrI (mg/kg/d) = 16.21 + 1.12 X [1 if male; 0 if female] – 0.06 X age (years) – 0.08 X single-pool Kt/Vurea + 0.009 X serum creatinine before dialysis (µmol/L).</p> <p>Weakness: HGS</p>                                  | <p>Cut-offs determined by median of study cohort.</p> <p>Sarcopenia: CrI = &lt;20.8mg/kg/d AND HGS = &lt;28kg (male)/18kg (female)</p>                                                                               |
| <b>Sarcopenia (CrI + MVF)</b> <sup>114</sup>        | <p>Sarcopenia = low muscle mass and low muscle strength.</p> <p>Muscle Mass: CrI, a type of creatinine kinetic modelling</p> <p>Muscle Strength: Maximal voluntary force (MVF) of the quadriceps, measured with a dynamometer</p>                                                                                                              | <p>Cut-offs determined by median of study cohort.</p> <p>Sarcopenia: CrI &lt; median AND MVF &lt; median</p>                                                                                                         |
| <b>Sarcopenia (LMI + HGS)</b> <sup>136</sup>        | <p>Sarcopenia = low muscle mass and weakness</p> <p>Muscle mass = Lean mass index (LMI) = lean body mass/height<sup>2</sup>; lean body mass (kg) = (1 if male; 0 if female) x 4.72 + height (cm) x 0.28 + weight (kg) x 0.27 + HGS (N) x 0.02 – dialysis duration (months) x 0.04 – 26.84</p> <p>Weakness = HGS</p>                            | <p>Sarcopenia:<br/>Low LMI: &lt; 16.7 kg/m<sup>2</sup> (male)/13.8 kg/m<sup>2</sup> (female)<br/>Low HGS: &lt; 24.5 kg (male)/14.0 kg (female)</p>                                                                   |

|                                                                            |                                                                                                                                                                                                                                              |                                                                                                                                                                                                                                |
|----------------------------------------------------------------------------|----------------------------------------------------------------------------------------------------------------------------------------------------------------------------------------------------------------------------------------------|--------------------------------------------------------------------------------------------------------------------------------------------------------------------------------------------------------------------------------|
| <b>Sarcopenia (Muscle Mass/Height<sup>2</sup> + Slowness)<sup>58</sup></b> | <p>Sarcopenia = low muscle mass and slowness<br/> Muscle mass: total body muscle mass by the square of the height (kg/m<sup>2</sup>) [measured by BIS]<br/> Slowness: gait speed (i.e., usual walk speed measured over a 15-foot course)</p> | <p>Gender-based cut-offs established by young, healthy, reference population<br/> Sarcopenia: muscle mass/height<sup>2</sup> = &lt;7.89kg/m<sup>2</sup> (male)/6.05kg/m<sup>2</sup> (female)<br/> AND gait speed = ≤0.8m/s</p> |
| <b>Sarcopenia (Muscle Mass/BW + Slowness)<sup>58</sup></b>                 | <p>Sarcopenia = low muscle mass and slowness<br/> Muscle mass: total body muscle mass by BW (%) [measured by BIS]<br/> Slowness: gait speed</p>                                                                                              | <p>Gender-based cut-offs established by young, healthy, reference population<br/> Sarcopenia: muscle mass/BW = &lt;32.68% (male)/27.65% (female) AND gait speed = ≤0.8m/s</p>                                                  |
| <b>Sarcopenia (Muscle Mass/BSA + Slowness)<sup>58</sup></b>                | <p>Sarcopenia = low muscle mass and slowness<br/> Muscle mass: total body muscle mass by BSA (kg/m<sup>2</sup>) [measured by BIS]<br/> Slowness: gait speed</p>                                                                              | <p>Gender-based cut-offs established by young, healthy, reference population<br/> Sarcopenia: muscle mass/BSA = &lt;14.31kg/m<sup>2</sup> (male)/11.64kg/m<sup>2</sup> (female)<br/> AND gait speed = ≤0.8m/s</p>              |
| <b>Sarcopenia (Muscle Mass/BMI + Slowness)<sup>58</sup></b>                | <p>Sarcopenia = low muscle mass and slowness<br/> Muscle mass: total body muscle mass by BMI (m<sup>2</sup>) [measured by BIS]<br/> Slowness: gait speed</p>                                                                                 | <p>Gender-based cut-offs established by young, healthy, reference population<br/> Sarcopenia: muscle mass/BMI = &lt;0.97/m<sup>2</sup> (male)/0.72kg/m<sup>2</sup> (female) AND gait speed = ≤0.8m/s</p>                       |

|                                                                                         |                                                                                                                                                                                   |                                                                                                                                                                                                                                                       |
|-----------------------------------------------------------------------------------------|-----------------------------------------------------------------------------------------------------------------------------------------------------------------------------------|-------------------------------------------------------------------------------------------------------------------------------------------------------------------------------------------------------------------------------------------------------|
| <b>Sarcopenia (Muscle Mass/Height<sup>2</sup> + Weakness)</b><br><small>58</small>      | <p>Sarcopenia = low muscle mass and weakness</p> <p>Muscle mass: total body muscle mass by the square of the height (kg/m<sup>2</sup>) [measured by BIS]</p> <p>Weakness: HGS</p> | <p>Gender-based cut-offs established by young, healthy, reference population</p> <p>Sarcopenia: muscle mass/height<sup>2</sup> = &lt;7.89kg/m<sup>2</sup> (male)/6.05kg/m<sup>2</sup> (female)</p> <p>AND HGS = &lt;26kg (male)/&lt;16kg (female)</p> |
| <b>Sarcopenia (Muscle Mass/Body Weight (BW) + Weakness)</b><br><small>58</small>        | <p>Sarcopenia = low muscle mass and weakness</p> <p>Muscle mass: total body muscle mass by BW (%) [measured by BIS]</p> <p>Weakness: HGS</p>                                      | <p>Gender-based cut-offs established by young, healthy, reference population</p> <p>Sarcopenia: muscle mass/BW = &lt;32.68% (male)/27.65% (female) AND HGS = &lt;26kg (male)/&lt;16kg (female)</p>                                                    |
| <b>Sarcopenia (Muscle Mass/Body Surface Area (BSA) + Weakness)</b><br><small>58</small> | <p>Sarcopenia = low muscle mass and weakness</p> <p>Muscle mass: total body muscle mass by BSA (kg/m<sup>2</sup>) [measured by BIS]</p> <p>Weakness: HGS</p>                      | <p>Gender-based cut-offs established by young, healthy, reference population</p> <p>Sarcopenia: muscle mass/BSA = &lt;14.31kg/m<sup>2</sup> (male)/11.64kg/m<sup>2</sup> (female)</p> <p>AND HGS = &lt;26kg (male)/&lt;16kg (female)</p>              |
| <b>Sarcopenia (Muscle Mass/Body Mass Index (BMI) + Weakness)</b><br><small>58</small>   | <p>Sarcopenia = low muscle mass and weakness</p> <p>Muscle mass: total body muscle mass by BMI (m<sup>2</sup>) [measured by BIS]</p> <p>Weakness: HGS</p>                         | <p>Gender-based cut-offs established by young, healthy, reference population</p> <p>Sarcopenia: muscle mass/BMI = &lt;0.97/m<sup>2</sup> (male)/0.72kg/m<sup>2</sup> (female) AND HGS = &lt;26kg (male)/&lt;16kg (female)</p>                         |



|                                                                                 |                                                                                                                                                                                                                                                                                                                                              |                                                                                                                                                                                                                                                                                                                                                                                                                         |
|---------------------------------------------------------------------------------|----------------------------------------------------------------------------------------------------------------------------------------------------------------------------------------------------------------------------------------------------------------------------------------------------------------------------------------------|-------------------------------------------------------------------------------------------------------------------------------------------------------------------------------------------------------------------------------------------------------------------------------------------------------------------------------------------------------------------------------------------------------------------------|
| <p><b>Sarcopenia (RASM + HGS/Gait Speed)</b><sup>53</sup></p>                   | <p>Sarcopenia = low muscle mass + weakness and/or poor physical function (below sex specific cut-offs)<br/> Muscle mass: Relative Appendicular Skeletal Muscle (RASM) = appendicular skeletal muscle mass divided by the square of the height (kg/m<sup>2</sup>) [measured by BIA]<br/> Weakness: HGS<br/> Physical function: gait speed</p> | <p>Gender-based cut-offs established by young, healthy, reference population<br/> Sarcopenia: RASM = &lt;7.0 g/m<sup>2</sup> (male)/5.7kg/m<sup>2</sup> (female)<br/> AND HGS = &lt;26kg (male)/&lt;18kg (female)<br/> AND/OR gait speed = &lt;0.8m/s</p>                                                                                                                                                               |
| <p><b>Sarcopenia (SMI + HGS/Gait Speed)</b><sup>73</sup></p>                    | <p>Sarcopenia = low muscle mass + weakness and/or slowness (below sex specific cut-offs)<br/> Muscle mass: Skeletal Muscle Mass Index (SMI) = skeletal muscle mass/height squared (kg/m<sup>2</sup>) [measured by BIA]<br/> Weakness: HGS<br/> Slowness: gait speed</p>                                                                      | <p>Gender-based cut-offs established by young, healthy, reference population<br/> Sarcopenia: SMI = &lt;10.76kg/m<sup>2</sup> (male)/6.76kg/m<sup>2</sup> (female)] AND HGS = &lt;30kg (male)/&lt;20kg (female)<br/> AND/OR gait speed = &lt;0.8m/s [Alternatively: SMI = &lt;8.87kg/m<sup>2</sup> (male)/6.42kg/m<sup>2</sup> (female) AND HGS = &lt;26kg (male)/&lt;18kg (female) AND/OR gait speed = &lt;0.8m/s]</p> |
| <p><b>Sarcopenia Method A (MAMC + Handgrip Strength (HGS))</b><sup>95</sup></p> | <p>Sarcopenia = low muscle mass and low muscle strength (below sex specific cut-offs)<br/> Muscle mass = MAMC (cm) = midarm circumference (cm) – 3.142 x TSF (cm)<br/> Muscle strength = HGS</p>                                                                                                                                             | <p>Gender-based cut-offs established by young, healthy, reference population<br/> Sarcopenia: MAMC = below the 50<sup>th</sup> percentile of a reference population AND HGS = below the 30<sup>th</sup> percentile of a reference population</p>                                                                                                                                                                        |

|                                                         |                                                                                                                                                                                                                                                    |                                                                                                                                                                                                                                                                                                       |
|---------------------------------------------------------|----------------------------------------------------------------------------------------------------------------------------------------------------------------------------------------------------------------------------------------------------|-------------------------------------------------------------------------------------------------------------------------------------------------------------------------------------------------------------------------------------------------------------------------------------------------------|
| <p><b>Sarcopenia Method B (SGA + HGS)</b><br/>95</p>    | <p>Sarcopenia = low muscle mass and low muscle strength (below sex specific cut-offs)<br/>Muscle mass = muscle wasting as determined by the physical examination component of the Subjective Global Assessment (SGA)<br/>Muscle strength = HGS</p> | <p>Gender-based cut-offs established by young, healthy, reference population<br/>Sarcopenia: SGA = + for muscle wasting AND HGS = below the 30<sup>th</sup> percentile of a reference population</p>                                                                                                  |
| <p><b>Sarcopenia Method C (SMI + HGS)</b><br/>95,99</p> | <p>Sarcopenia = low muscle mass and low muscle strength (below sex specific cut-offs)<br/>Muscle mass: Skeletal Muscle Mass Index (SMI) = skeletal muscle mass/height squared (kg/m<sup>2</sup>) [measured by BIA]<br/>Muscle strength = HGS</p>   | <p>Gender-based cut-offs established by young, healthy, reference population<br/>Sarcopenia: SMI = &lt;10.76kg/m<sup>2</sup> (male)/6.76kg/m<sup>2</sup> (female) AND HGS = below the 30<sup>th</sup> percentile of a reference population<br/>[Alternatively: &lt;30kg (male)/&lt;20kg (female)]</p> |
| <p><b>Sarcopenia Status</b><sup>57,112</sup></p>        | <p>Sarcopenia = low muscle mass and low muscle strength (below sex specific cut-offs)<br/>Muscle mass: LTI = total lean tissue mass by BSA (kg/m<sup>2</sup>) [measured by BIS]<br/>Muscle strength: HGS</p>                                       | <p>Gender-based cut-offs established by young, healthy, reference population<br/>Sarcopenia: LTI = 2 SDs below the mean of a reference population AND HGS = &lt;30kg (male)/&lt;20kg (female)<br/>[Alternatively: LTI &lt;10<sup>th</sup> percentile of a reference population]</p>                   |

|                                                                                     |                                                                                                                       |                                                                                                                              |
|-------------------------------------------------------------------------------------|-----------------------------------------------------------------------------------------------------------------------|------------------------------------------------------------------------------------------------------------------------------|
| <b>Revised Illness Perception Questionnaire (IPQ-R) – Weight Loss</b> <sup>23</sup> | Questionnaire about the onset of symptoms: weight loss component.*                                                    | Presence or absence of weight loss                                                                                           |
| <b>Weight Loss</b> <sup>15, 103</sup>                                               | Self-reported amount of unintentional weight loss using questionnaire.                                                | Weight loss = loss of $\geq 10$ lbs in 6 months [Alternatively: loss of $\geq 10$ lbs in 12 months]                          |
| <b>Gait</b>                                                                         |                                                                                                                       |                                                                                                                              |
| <b>Gait Speed</b> <sup>15, 53, 58, 63, 67, 73, 103, 104, 138</sup>                  | Usual walk speed measured over a 13.1-foot, 15-foot, or 32-foot course.                                               | Assessed as a continuous measure or categorically using various cut-off values                                               |
| <b>Gait Speed [self-report]</b> <sup>21</sup>                                       | Self-report of walking pace, extracted from the General Practice Physical Activity Questionnaire.                     | Fast ( $> 4$ mph)<br>Brisk<br>Steady<br>Slow ( $< 3$ mph)                                                                    |
| <b>6-Minute Walk Test (6MWT)</b> <sup>60, 104, 109, 120, 125</sup>                  | The goal of this test is to walk as far as possible in six minutes.                                                   | By various increments (in meters)                                                                                            |
| <b>Timed Up-and-Go (TUG)</b> <sup>33, 104, 128</sup>                                | Time to get up from a fully seated position, walk around a cone placed 4m away, and then return to a seated position. | Fast ( $< 12$ s)<br>Slow ( $\geq 12$ s)<br>[Alternatively: Mildly Impaired (10-20s), Impaired ( $> 20$ s); or per 1s slower] |
| <b>2-Minute Step</b> <sup>122</sup>                                                 | Patient alternately raises each knee for 2 minutes. Score based on the number of repetitions.                         | Good endurance: $> 105$ repetitions<br>Poor endurance: $\leq 105$ repetitions                                                |

| Strength Measurement                                                                                              |                                                                                                                                                                                                                                                                                                                                                                                                                                         |                                                                                                                                                                                                        |
|-------------------------------------------------------------------------------------------------------------------|-----------------------------------------------------------------------------------------------------------------------------------------------------------------------------------------------------------------------------------------------------------------------------------------------------------------------------------------------------------------------------------------------------------------------------------------|--------------------------------------------------------------------------------------------------------------------------------------------------------------------------------------------------------|
| <b>Handgrip Strength (HGS)</b> <sup>15,19,22,32,37,40,53,57,58,63,73,80,103,104,115,122,125,130-132,136,138</sup> | Patients hold a dynamometer (posture varies by study) and are encouraged to squeeze the instrument as hard as possible for 3 seconds. HGS repeated 2-4 times for dominant and non-dominant hands. The maximum value is used.                                                                                                                                                                                                            | Weak/Low Strength = below a sex (and/or BMI) based cut-off (varies by study)<br>[Alternatively: Per unit decrease]                                                                                     |
| <b>Biceps Muscle Strength</b> <sup>140</sup>                                                                      | Measured with a digital handheld dynamometer in the non-fistula hand or dominant hand. Each measurement was repeated 3 times and the mean value (in kg) was used.                                                                                                                                                                                                                                                                       | Low/High muscle strength groups determined by the mean score of the study cohort                                                                                                                       |
| <b>Dynapenia</b> <sup>114</sup>                                                                                   | Dynapenia is defined as normal muscle mass and low muscle strength.<br>Muscle Mass: CI, a type of creatinine kinetic modelling<br>Muscle Strength: MVF of the quadriceps, measured with a dynamometer                                                                                                                                                                                                                                   | Cut-offs determined by median of study cohort.<br>Dynapenia: CI > median AND MVF < median                                                                                                              |
| <b>Isometric quadriceps strength</b> <sup>37</sup>                                                                | Measurement of proximal strength knee stretch against resistance (kg multiplied by cm).                                                                                                                                                                                                                                                                                                                                                 | Normative reference values:<br>25 <sup>th</sup> percentile= 1134 kg x cm<br>50 <sup>th</sup> percentile= 1412 kg x cm<br>75 <sup>th</sup> percentile= 1658 kg x cm<br>[Alternatively: Per unit change] |
| <b>Leg Extension Strength</b> <sup>134</sup>                                                                      | 5- or 10-repetition maximum tests using leg extension equipment. Maximal leg extension strength (the weight that participants were unable to lift more than 5 or 10 times with good form) was estimated using a prediction equation.                                                                                                                                                                                                    | Greater score (measured in kg) indicates greater strength                                                                                                                                              |
| <b>Lower extremity muscle strength</b> <sup>82</sup>                                                              | Knee extensor strength = Participants were seated on a bed with knees flexed to 90 degrees and told to push against the dynamometer pad by attempting to straighten their knees for a period of 5 seconds. Each side measured 3 times; average calculated by taking the highest value for the right and left legs. To adjust for physical constitution differences, this value was divided by dry weight and expressed as a percentage. | Low strength = < 40%                                                                                                                                                                                   |

|                                                                                          |                                                                                                                                                                                                                                                                              |                                                                                                                     |
|------------------------------------------------------------------------------------------|------------------------------------------------------------------------------------------------------------------------------------------------------------------------------------------------------------------------------------------------------------------------------|---------------------------------------------------------------------------------------------------------------------|
| <b>Standing heel rise</b> <sup>37</sup>                                                  | Measurement of distal strength. Patient stands against a wall and repeatedly gets up on tiptoe and down again until fatigue.                                                                                                                                                 | Normative reference value: 25 repetitions<br>[Alternatively: Per unit change]                                       |
| <b>30-Second Chair Stand</b> <sup>122, 125</sup>                                         | The number of repetitions in 30 seconds to stand fully from a seated position.                                                                                                                                                                                               | Good endurance: > 11 repetitions<br>Poor endurance: ≤ 11 repetitions<br>[Alternatively: Based on population median] |
| <b>Toe lift</b> <sup>37</sup>                                                            | Measurement of distal strength. Patient stands against a wall with the heels on the floor and repeatedly moves the forefoot up and down until fatigue.                                                                                                                       | Normative reference value: 20 repetitions<br>[Alternatively: Per unit change]                                       |
| <b>Revised Illness Perception Questionnaire (IPQ-R) – Loss of Strength</b> <sup>23</sup> | Questionnaire about the onset of symptoms: loss of strength component.*                                                                                                                                                                                                      | Presence or absence of loss of strength                                                                             |
| <b>Beck Depression Inventory-I (BDI-I) – Fatigue</b> <sup>34</sup>                       | Fatigue component of the BDI-I, self reported on a Likert scale of 0 (no fatigue) to 3 (severe fatigue):<br>0: I don't get any more tired than usual<br>1: I get tired more easily than I used to<br>2: I get tired from doing anything<br>3: I get too tired to do anything | Fatigue = 1-3<br>No Fatigue = 0                                                                                     |
| <b>CES-D – Exhaustion</b> <sup>15</sup>                                                  | 2 exhaustion related questions from the CES-D scale.                                                                                                                                                                                                                         | Exhaustion: answer “occasionally” or “most or all of the time” to either question                                   |

|                                                                                                                |                                                                                                                                                                                                                                                                                                                                                                                                                                                                        |                                                                                                   |
|----------------------------------------------------------------------------------------------------------------|------------------------------------------------------------------------------------------------------------------------------------------------------------------------------------------------------------------------------------------------------------------------------------------------------------------------------------------------------------------------------------------------------------------------------------------------------------------------|---------------------------------------------------------------------------------------------------|
| <b>Exhaustion</b> <sup>26</sup>                                                                                | Exhaustion determined by the response to the following question on the KDQOL-36 questionnaire:<br>(1) How much of the time during the last 4 weeks did you have a lot of energy?                                                                                                                                                                                                                                                                                       | Exhaustion defined as answering either:<br>(1) a little of the time<br>OR<br>(2) none of the time |
| <b>Fukuda Fatigue Scale</b> <sup>61</sup>                                                                      | Subjects used a Likert scale (0-4) to rate how often in a recent week they experienced the following symptoms:<br>Feeling so tired that I want to lie down at times; Feeling tired and without energy; Becoming very tired with just a small amount of exercise or work; Feeling sluggish lately; A recent lack of physical energy; Thinking that the way I get tired recently is abnormal; General fatigue lately; Even after a night's sleep do not feel refreshed.  | High fatigue: scores exceeding twice the SD of the mean of healthy subjects                       |
| <b>Palliative Care Outcome Scale Symptoms (POS-S) Renal – Weakness</b> <sup>28</sup>                           | POS-S Renal is a survey of 18 specific symptoms that affect renal patients. Weakness/low energy over the past week was scored on the following scale:<br>0=not at all (no effect)<br>1=slightly (but not bother to be rid of it)<br>2=moderately (limits some activity of concentration)<br>3=severely (activities or concentration markedly affected)<br>4=overwhelming (unable to think of anything else)                                                            | Weakness/Low Energy = 3-4                                                                         |
| <b>Quick Inventory of Depressive Symptomatology-Self Report (QIDS-SR<sub>16</sub>) – Fatigue</b> <sup>34</sup> | Fatigue component of the QIDS-SR <sub>16</sub> , self reported on a Likert scale of 0 (no fatigue) to 3 (severe fatigue):<br>Which item best describes you for the past 7 days?<br>0: There is no change in my usual level of energy<br>1: I get tired more easily than usual<br>2: I have to make a big effort to start or finish my usual daily activities<br>3: I really cannot carry out most of my usual daily activities because I just don't have enough energy | Fatigue = 1-3<br>No Fatigue = 0                                                                   |
| <b>Revised Illness Perception Questionnaire (IPQ-R) – Fatigue</b> <sup>23</sup>                                | Questionnaire about the onset of symptoms: fatigue component. *                                                                                                                                                                                                                                                                                                                                                                                                        | Presence or absence of fatigue                                                                    |

|                                                                               |                                                                                                                                                                                                                                                                                         |                                                                                                                                                                                                          |
|-------------------------------------------------------------------------------|-----------------------------------------------------------------------------------------------------------------------------------------------------------------------------------------------------------------------------------------------------------------------------------------|----------------------------------------------------------------------------------------------------------------------------------------------------------------------------------------------------------|
| <b>SF-36 Vitality Scale</b> <sup>13,44,45, 48, 52, 79, 103,117, 121,127</sup> | A four-item measure of vitality (energy level and fatigue) over the previous 4 weeks, scores range from 0 to 100, with lower score indicating more fatigue. Questions asked include: Did you feel full of pep? Did you have a lot of energy? Did you feel worn out? Did you feel tired? | Low vitality = below a cut-off (varies by study)<br>[Alternatively: By category (varies by study, e.g. by quartile), or per unit change]                                                                 |
| <b>SF-12 Vitality Scale</b> <sup>34, 64</sup>                                 | Vitality component of the SF-12: “How much time during the past 4 weeks did you have a lot of energy?”<br>Fatigue is measured with a Likert score range of 1 (“all of the time”) to 5 or 6 (“none of the time”).                                                                        | Higher scores represent more fatigue                                                                                                                                                                     |
| <b>Exercise Activity Score</b> <sup>65</sup>                                  | Three questions, each receiving a score of 1 (often) to 4 (never).<br>How frequently do you do: (1) work in the garden? (2) take walks? (3) engage in active sports or exercises?                                                                                                       | Most active = 3 points<br>Least active = 12 points<br>(change in exercise activity = 3-point shift towards least active)                                                                                 |
| <b>Exercise Frequency</b> <sup>119</sup>                                      | Physical exercise measured by asking: ‘How often do you exercise [do physical activity] during your leisure time?’<br>Answer options:<br>1. Daily or almost daily<br>2. 4-5 times/week<br>3. 2-3 times/week<br>4. About once/week<br>5. Less than once/week<br>6. Almost never or never | Exercise frequency categories:<br>1. 6-7 times/week<br>2. 4-5 times/week<br>3. 2-3 times/week<br>4. Once/week<br>5. < once/week or never<br>[Alternatively: per decrease in exercise frequency category] |
| <b>Four Week Physical Activity History Questionnaire</b> <sup>102</sup>       | Frequency and duration of the following activities in the previous month: walking for exercise, jogging, biking, aerobics, golf, tennis, swimming, weight training, running on a treadmill, or using an aerobic machine.<br>Number of minutes per week averaged for each activity.      | Exercise per week:<br>None<br>1-60 min/week<br>60-150 min/week<br>>150 min/week                                                                                                                          |

|                                                                         |                                                                                                                                                                                                                                                                                                                                                                                                                                                                                           |                                                                                                                                                                                                   |
|-------------------------------------------------------------------------|-------------------------------------------------------------------------------------------------------------------------------------------------------------------------------------------------------------------------------------------------------------------------------------------------------------------------------------------------------------------------------------------------------------------------------------------------------------------------------------------|---------------------------------------------------------------------------------------------------------------------------------------------------------------------------------------------------|
| <b>Human Activity Profile - Adjusted Activity Score</b> <sup>26</sup>   | 94-item questionnaire assessing ability to perform activities of increasing metabolic equivalents (MET), ranging from getting in or out of a chair/bed (score = 1) to running 3 miles in ≤30 minutes (score = 94). Each activity is answered as (1) still doing the activity; (2) stopped doing the activity; or (3) never did the activity. The Adjusted Activity Score is the highest-level activity the respondent can still perform minus the number of activities they have stopped. | Inactivity = Lowest quintile, stratified by age and gender                                                                                                                                        |
| <b>Leisure Time Physical Activity (LTPA)</b> <sup>6,11, 89</sup>        | Questionnaire assessing frequency of various leisure time activities in the past 30 days: walking a mile without stopping, running, jogging, cycling, swimming, aerobics, dancing, calisthenics, garden/yard work, lifting weights, etc. Physical activity converted to METs based on the Compendium of Physical Activities. Activity level presented as METs, METs/wk, or MET-min/wk.                                                                                                    | Low physical activity = < 450 MET/wk<br>[Alternatively: By category (cut-offs/units vary by study), or per unit change]                                                                           |
| <b>Physical Activity</b> <sup>48,103</sup>                              | How often do you exercise (do physical activity during your leisure time)?                                                                                                                                                                                                                                                                                                                                                                                                                | Inactive = almost never or never<br>[Alternatively: <1 time per week or never]                                                                                                                    |
| <b>Physical Activity Scale for the Elderly (PASE)</b> <sup>15, 98</sup> | A self-report tool that includes questions about activities (occupational, household, leisure) performed during the previous 7 days. A total score was calculated by multiplying the total time spent per week or participation (yes/no) by a weighted score assigned to each activity and summed across all activity items.                                                                                                                                                              | Low physical activity: 0-40<br>Light physical activity: 41-90<br>Moderate to high physical activity: >90<br>[Alternatively: Low physical activity = <383kcal/week (male), <270kcal/week (female)] |
| <b>Physical Activity – WHO Recommendations</b> <sup>54</sup>            | The amount of moderate or vigorous intensity activity in a 3-month period. Scoring based on 2010 WHO Global Recommendations for Physical Activity for Health.                                                                                                                                                                                                                                                                                                                             | Active = moderate activity for >30min/day for 5 days a week<br>OR high intensity for >20min/day for 3 days a week<br>Intermediate<br>Inactive = physical activity <1 time per week                |



|                                                                   |                                                                                                                                                                                                                          |                                                                                                             |
|-------------------------------------------------------------------|--------------------------------------------------------------------------------------------------------------------------------------------------------------------------------------------------------------------------|-------------------------------------------------------------------------------------------------------------|
| <b>Rapid Assessment of Physical Activity (RAPA)</b> <sup>74</sup> | Questionnaire with binary (yes or no) questions for light, moderate, and vigorous physical activities with increasing intensity. Score chosen by selecting the question with highest score with an affirmative response. | Sedentary = 1<br>Infrequently active = 2<br>Sometimes active = 3<br>Often active = 4-5<br>Very active = 6-7 |
| <b>Voorrips Score</b> <sup>114</sup>                              | An assessment of physical activity/muscle function in the past 3 months.                                                                                                                                                 | Not specified                                                                                               |
| <b>Walking</b> <sup>21</sup>                                      | Self-report number of hours spent walking each week (including walking to work, shopping, and walking for pleasure), extracted from the General Practice Physical Activity Questionnaire.                                | None<br>Some, but < 1 hour<br>1-3 hours<br>≥ 3 hours                                                        |

\* For this study, only a portion of the questionnaire was relevant; these components include weight loss, loss of strength and fatigue component

† Indicates differences from Fried

**Abbreviations:** 6MWT, 6-Minute Walk Test; ADL, Activities of Daily Living; ASMI, Appendicular Skeletal Mass Index; BDI-I, Beck Depression Inventory-I; BI, Barthel Index; BIA, bioelectrical impedance analysis; BIS, bioelectrical impedance spectroscopy; BMI, body mass index; BSA, body surface area; BW, body weight; CES-D, Center for Epidemiologic Studies-Depression; CFS, Clinical Frailty Scale; CrI, Creatinine Index; DXA, dual-energy x-ray absorptiometry; FQ, Frailty Score; HD, hemodialysis; HGS, handgrip strength; IADL, Instrumental Activities of Daily Living; IPQ-R, Revised Illness Perception Questionnaire; LMI, Lean Mass Index; LTI, Lean Tissue Index; LTLM, limb/trunk lean mass ratio; LTPA, Leisure Time Physical Activity; MAMC, midarm muscle circumference; MET, metabolic equivalent; MVF, maximal voluntary force; PASE, Physical Activity Scale for the Elderly; PF, physical function; POS-S, Palliative Care Outcome Scale – Symptoms; QIDS-SR<sub>16</sub>, Quick Inventory of Depressive Symptomatology – Self Report; RAPA, Rapid Assessment of Physical Activity; RASM, relative appendicular skeletal muscle; SGA, Subjective Global Assessment; SMI, Skeletal Muscle Index; SPPB, Short Physical Performance Battery; TSF, triceps skinfold thickness; TUG, Timed Up-and-Go Test; WHO, World Health Organization.

## 2B. Functional Status Tools

| Tool                                                   | Measurement method                                                                                                                                                                                                                                                                                                                                                                                                                                                                                   | Criteria for Poor Functional Status                                                     |
|--------------------------------------------------------|------------------------------------------------------------------------------------------------------------------------------------------------------------------------------------------------------------------------------------------------------------------------------------------------------------------------------------------------------------------------------------------------------------------------------------------------------------------------------------------------------|-----------------------------------------------------------------------------------------|
| <b>Activity of Daily Living Score</b> <sup>3-5</sup>   | ADL scores determined by geriatricians based on ability to eat, dress, bathe, groom, ambulate, communicate, transfer, and use the toilet. Each activity was scored (maximum score of 16): 2 points (total independence), 1 point (assistance required), 0 (total dependency). Maintaining urinary continence was sometimes included (maximum score of 18).                                                                                                                                           | Reduced ADL = below mean value (varies by study)<br>[Alternatively: Per 1-point change] |
| <b>ADL</b> <sup>12</sup>                               | Degree of restriction of daily living activities.                                                                                                                                                                                                                                                                                                                                                                                                                                                    | No restriction<br>Moderate restriction<br>Severe restriction                            |
| <b>ADL Difficulty</b> <sup>133</sup>                   | Lower limb function evaluated by a 12-item questionnaire developed for HD patients: rising from chair (1), floor (2); sitting down on floor (3); walking 100m (4), 300m (5), 600m (6), 1km (7), 20m quickly (8); walking up/down 1 or 2 flights of stairs (9-12).<br>Each item scored 1-5 points based on perceived difficulty: 1, not possible; 2, severe difficulty; 3, moderate difficulty; 4, mild difficulty; 5, ease. A lower score (out of a maximum of 60) indicates greater ADL difficulty. | ADL difficulty = < 45 (median)                                                          |
| <b>Barthel Index (BI)</b> <sup>39</sup>                | 10 items: eating, transferring between the bed and wheelchair, grooming, using the toilet, bathing, walking on a flat surface, climbing and descending stairs, dressing, controlling bowel movements, and controlling urination.<br>Each item is evaluated on a two-point (0 and 5) or four-point (0, 5, 10, and 15) scale, with a total score 0-100 (in increments of 5).                                                                                                                           | High = 100<br>Middle = 75-95<br>Low = ≤ 70                                              |
| <b>Basic Activities of Daily Living</b> <sup>111</sup> | Categorizes patients as either independent or impaired.                                                                                                                                                                                                                                                                                                                                                                                                                                              | Independent<br>Impaired                                                                 |
| <b>Disability</b> <sup>55,70</sup>                     | 4-item ADL score assessing the patient's ability to eat, dress, get out of bed, and bathe. Each activity was scored according to assistance required: no help (0 points); some help (1 point); full help (2 points).                                                                                                                                                                                                                                                                                 | No Disability = 0<br>Disability = 1-8                                                   |

|                                                                  |                                                                                                                                                                                                                                                                                                                                                                                             |                                                                                                                                              |
|------------------------------------------------------------------|---------------------------------------------------------------------------------------------------------------------------------------------------------------------------------------------------------------------------------------------------------------------------------------------------------------------------------------------------------------------------------------------|----------------------------------------------------------------------------------------------------------------------------------------------|
| <b>Duke Activity Status Index (DASI)</b> <sup>21</sup>           | A 12-item ADL questionnaire. Each activity is assigned a metabolic equivalent of tasks (METs) value, the sum of which provides a score out of 58.2. A higher DASI score is associated with better physical functioning.                                                                                                                                                                     | Better physical function: > 19.2 METS                                                                                                        |
| <b>Functional Limitations Score</b> <sup>65,66.</sup>            | Five questions, answer to each determines whether the next question is posed, or final score is determined from that question.<br>(1) Does patient spend most or all day in bed or chair? Patient's reported difficulty doing specific activities: (2) Bathing independently, (3) Climbing a few flights of stairs, (4) Walking several blocks, (5) Performing heavy work around the house. | Most severe = 1<br>Moderately severe = 2<br>Least severe = 3<br>No impairment = 4                                                            |
| <b>Functional Status – Ability to Perform ADL</b> <sup>139</sup> | Inability to perform ADL evaluated by nephrologist, and categorized as: severe (bedridden), moderate (overt difficulties in exerting basic ADL), or mild/none (none or some functional disabilities that are not moderate or severe).                                                                                                                                                       | Severe<br>Moderate<br>Mild/none                                                                                                              |
| <b>Functional Status – Form CMS-2728</b> <sup>96, 107</sup>      | Question(s) on Medicare ESRD eligibility Form CMS-2728 relating to functional status:<br>1. inability to ambulate<br>2. inability to transfer<br>3. needs assistance with daily activities                                                                                                                                                                                                  | An affirmative answer to any of the three questions implies poor functional status                                                           |
| <b>Functional Status Score</b> <sup>135</sup>                    | Based on a previously developed algorithm. Data obtained from Medicare billings claims data, including claims for use of durable medical equipment.                                                                                                                                                                                                                                         | ≤ 0 (High functional status)<br>1-2<br>3-4<br>5-6<br>≥ 7 (Low functional status)                                                             |
| <b>Katz' ADL</b> <sup>§</sup><br>14,33, 108, 113,128             | Evaluates eating, dressing, bathing, toileting, transferring, and continence. 1 point is given for independence in each area, up to a maximum of 6.                                                                                                                                                                                                                                         | Impairment: < 6<br>[Alternatively: Per unit change, OR<br>Severe functional impairment: ≤ 2<br>Moderate impairment = 4<br>Full function = 6] |

|                                                                                      |                                                                                                                                                                                                                                                                                                                                                                                                                                                                                                                                                                                          |                                                                                                                                |
|--------------------------------------------------------------------------------------|------------------------------------------------------------------------------------------------------------------------------------------------------------------------------------------------------------------------------------------------------------------------------------------------------------------------------------------------------------------------------------------------------------------------------------------------------------------------------------------------------------------------------------------------------------------------------------------|--------------------------------------------------------------------------------------------------------------------------------|
| <b>4-Item Essential ADL Score</b> <sup>29</sup>                                      | 4-item ADL score with a dichotomous scale assessing the patient's ability to walk 50 yards, transfer from a chair, dress, and bathe independently.<br>Score = total number of items for which the patient required help (0 = needs no assistance on any of the 4 items)                                                                                                                                                                                                                                                                                                                  | Score 0 (no disability)<br>Score 1<br>Score 2<br>Score 3<br>Score 4 (severe disability)<br>[Alternatively: Per unit change]    |
| <b>Lawton and Brody's IADL Scale</b> <sup>14, 33, 128</sup>                          | Assesses independence in: using the telephone, shopping, food preparation, housekeeping, laundering, traveling, taking medications, and handling finances. 1 point is given for independence in each area, with a total score of 8.                                                                                                                                                                                                                                                                                                                                                      | Impairment = <8<br>Not impaired = 8                                                                                            |
| <b>Functional Status Score (ADL &amp; IADL)</b> <sup>33, 42, 81, 118</sup>           | Combined ADL and IADL scale to assess overall functional status score; ability to perform 5 ADLs (Katz) and 8 IADLs (Lawton-Brody); total score out of 13.<br>ADLs (ability to perform task without assistance – yes/no): eating, getting dressed, bathing, using the toilet, transferring from bed to chair<br>IADLs (ability to perform the task – no help/some help/unable to do at all): using the telephone, getting places beyond walking distance, grocery shopping, preparing meals, doing housework or handyman work, doing laundry, taking medications, managing money         | Categorized into increasingly smaller groups<br>Functionally independent: 13<br>11 to < 13<br>8 to < 11<br>Most dependent: < 8 |
| <b>Eastern Cooperative Oncology Group Performance Status (ECOG-PS)</b> <sup>36</sup> | Categories assigned by doctors:<br>0. Fully active, able to carry on all pre-disease performance without restriction<br>1. Restricted in physically strenuous activity but ambulatory and able to carry out work of a light or sedentary nature<br>2. Ambulatory and capable of all selfcare but unable to carry out any work activities. Up and about more than 50% of waking hours<br>3. Capable of only limited selfcare, confined to bed or chair more than 50% of waking hours<br>4. Completely disabled. Cannot carry on any selfcare. Totally confined to bed or chair<br>5. Dead | Low performance status: >1                                                                                                     |

|                                                                                  |                                                                                                                                                                                                                                                                                                                                                                                                                                                                                                                                                                                                                                                                                                                                                                                                                       |                                                                                                                                                                                                                                                                           |
|----------------------------------------------------------------------------------|-----------------------------------------------------------------------------------------------------------------------------------------------------------------------------------------------------------------------------------------------------------------------------------------------------------------------------------------------------------------------------------------------------------------------------------------------------------------------------------------------------------------------------------------------------------------------------------------------------------------------------------------------------------------------------------------------------------------------------------------------------------------------------------------------------------------------|---------------------------------------------------------------------------------------------------------------------------------------------------------------------------------------------------------------------------------------------------------------------------|
| <p><b>Karnofsky Performance Scale (KPS)</b><sup>18,50,51,85,86,100,124</sup></p> | <p>Patient's ability to carry on normal activities, categorized as one of the following:</p> <p>100: Normal (no complaints, no sign of disease)<br/> 90: Capable of normal activity (few symptoms or signs of disease)<br/> 80: Normal activity with some difficulty (some symptoms or signs)<br/> 70: Caring for self (not capable of normal activity or work)<br/> 60: Requiring some help (can take care of most personal requirements)<br/> 50: Requires help often (needs frequent medical care)<br/> 40: Disabled (requires special care and help)<br/> 30: Severely disabled (hospital admission indicated but no risk of death)<br/> 20: Very ill (urgently requiring admission, requires supportive measures or treatment)<br/> 10: Moribund (rapidly progressive fatal disease processes)<br/> 0: Death</p> | <p>Normal activity: <math>\geq 80</math><br/> Requiring assistance = 50-70<br/> Dependent: <math>\leq 40</math><br/> (minor variations in categories/cut-offs between studies)<br/> [Alternatively: Low functional status = <math>&lt; 70</math>, or per unit change]</p> |
| <p><b>Karnofsky Performance Scale (KPS) [modified]</b><sup>30,38,75</sup></p>    | <p>Modified KPS comprising 14 different levels of activity, with narrower ranges at each level:</p> <p>96-100: Normal function, no disability<br/> 91-95: Minor signs and symptoms, full activity<br/> 81-90: Usual activities with effort<br/> 76-80: Independent, most out of home activities<br/> 70-75: Independent, limited to home<br/> 65-69: Needs assistance with errands<br/> 60-64: Needs assistance with meal preparation<br/> 55-59: Needs assistance with bathing/dressing<br/> 50-54: Home attendant, not totally disabled<br/> 45-49: Disabled, living at home<br/> 40-44: Nursing home for long term care<br/> 35-39: Hospitalized, fair condition<br/> 30-34: Hospitalized, poor condition<br/> <math>&lt; 30</math>: Hospitalized, progressive fatal process</p>                                   | <p>Low functional status: <math>&lt; 70</math><br/> [Alternatively: By quartile, or per unit change]</p>                                                                                                                                                                  |

|                                                                                      |                                                                                                                                                                                                                                                                                                                                                                                                                                                               |                                                                                                     |
|--------------------------------------------------------------------------------------|---------------------------------------------------------------------------------------------------------------------------------------------------------------------------------------------------------------------------------------------------------------------------------------------------------------------------------------------------------------------------------------------------------------------------------------------------------------|-----------------------------------------------------------------------------------------------------|
| <b>Mobility – Criteria for Impaired Elderly</b> <sup>7</sup>                         | Mobility was divided into 8 categories:<br>i. able to walk without any limitation<br>ii. Able to walk without assistance only in the neighbourhood<br>iii. Able to walk without assistance only indoors<br>iv. Need assistance to walk<br>v. able to stand without assistance, but not walk<br>vi. Need assistance to stand<br>vii. Able to roll over without assistance in bed, but not stand<br>viii. Need assistance to roll over in bed                   | Independent mobility = i<br>Moderately impaired mobility = ii, iii<br>Impaired mobility = iv – viii |
| <b>Palliative Care Outcome Scale Symptoms (POS-S) Renal – Mobility</b> <sup>28</sup> | POS-S Renal is a survey of 18 specific symptoms that affect renal patients. Low mobility over the past week was scored on the following scale:<br>0=not at all (no effect)<br>1=slightly (but not bother to be rid of it)<br>2=moderately (limits some activity of concentration)<br>3=severely (activities or concentration markedly affected)<br>4=overwhelming (unable to think of anything else)                                                          | Low mobility = 3-4                                                                                  |
| <b>Physical Performance</b> <sup>71</sup>                                            | Physical performance assessed by gait speed and handgrip strength (HGS).<br>Gait speed: usual walk speed measured over a 13.1-foot course. The average of 3 tests was used.<br>HGS: measured on the dominant hand. The highest value of 3 tests was used.<br>Low gait speed and HGS were defined by suggestions made by the Asian Working Group for Sarcopenia.                                                                                               | Low physical performance:<br>gait speed = <0.8m/s AND<br>HGS = <26kg (male)/18kg (female)           |
| <b>State of Health</b> <sup>101</sup>                                                | Health status assigned by doctor:<br>Health status 1: able to carry on essentially normal activity having only inconsequential signs or symptoms<br>Health status 2: able to carry on limited activity, having some signs or symptoms<br>Health status 3: carried on minimal activity, but cared for personal needs<br>Health status 4: unable to care for themselves, requiring hospital or equivalent care at home<br>Health status 5: moribund-preterminal | Health status 1 to 5                                                                                |

|                                                                                                              |                                                                                                                                                                                                                                                                                                                             |                                                                                                                                                   |
|--------------------------------------------------------------------------------------------------------------|-----------------------------------------------------------------------------------------------------------------------------------------------------------------------------------------------------------------------------------------------------------------------------------------------------------------------------|---------------------------------------------------------------------------------------------------------------------------------------------------|
| <b>SF-36 Physical Component Summary (PCS)</b> <sup>16, 23,27,52, 55, 59,68, 75, 77, 79,93, 94, 117,123</sup> | SF-36 PCS, includes up to 26 questions on physical functioning (10 questions), role-physical (4), bodily pain (2), and general health (4). Some studies included the domains of vitality (4) and social functioning (2) in the summary score. Scale of 0 to 100; higher scores represent better physical function outcomes. | Low physical function = below a cut-off (varies by study)<br>[Alternatively: By category (varies by study, e.g. by quartile), or per unit change] |
| <b>SF-12 PCS</b> <sup>35,68</sup>                                                                            | Shortened version of the SF-36 PCS. Only includes 7 questions on physical functioning (2), role-physical (2), bodily pain (1), general health (1), and vitality (1) (vs. 26 questions in the SF-36 PCS). Scale of 0 to 100; higher scores represent better physical function outcomes.                                      | Categories: <25; 25-29; 30-34; 35-39; 40-44; >44<br>[Alternatively: Per unit change]                                                              |
| <b>SF-36 Physical Function (PF) Scale</b> <sup>8,16,24, 48, 52, 79, 106, 117, 121, 126,127</sup>             | SF-36 PF domain; includes 10 questions that assess patients' self reported challenges completing common physical activities requiring varying levels of effort, such as bending and kneeling or walking a mile. Scale from 0 (lowest functioning) to 100 (highest functioning).                                             | By 10-point change or by various cut-offs                                                                                                         |
| <b>SF-12 PF Scale</b> <sup>26,31</sup>                                                                       | Shortened version of the SF-36 PF domain. Two questions (vs. 10 questions in the SF-36 PF domain) assess level of difficulty in performing moderate activities and climbing several flights of stairs. Scale from 0 (lowest functioning) to 100 (highest functioning).                                                      | Low Function: <75<br>[Alternatively: Categorized as 0; 25; 50; 75; 100]                                                                           |

<sup>8</sup>Sood, 2018(ref) deviates from scoring scheme: 12 points total: No/mild impairment = 0-1; Moderate impairment = 2-5; Marked impairment = >5.

**Abbreviations:** ADL, Activities of Daily Living; BI, Barthel Index; DASI, Duke Activity Status Index; ECOG-PS, Eastern Cooperative Oncology Group Performance Status; ESRD, end stage renal disease; HGS, handgrip strength; IADL, Instrumental Activities of Daily Living; KPS, Karnofsky Performance Status; MET, metabolic equivalent of tasks; NYHA, New York Heart Association; PCS, Physical Component Summary; PF, physical function; SPPB, Short Physical Performance Battery; UNOS, United Network for Organ Sharing

**Table S3.** Overview of the association between frailty and functional status instruments and clinical adverse outcomes, classified by patient population

| Author, Year                                         | N    | Tool                    | Follow-up              | Analysis <sup>§</sup>                                                                                       | Main Findings                                                                                  |
|------------------------------------------------------|------|-------------------------|------------------------|-------------------------------------------------------------------------------------------------------------|------------------------------------------------------------------------------------------------|
| <b>Cardiovascular Disease</b>                        |      |                         |                        |                                                                                                             |                                                                                                |
| <b>CKD Non-Dialysis Patients</b>                     |      |                         |                        |                                                                                                             |                                                                                                |
| Frailty Tools, overall frailty or individual domains |      |                         |                        |                                                                                                             |                                                                                                |
| Tsai, 2017 <sup>122</sup>                            | 161  | 2-Minute Step           | 2.4 years <sup>¶</sup> | High 2-Minute Step (ref) vs. Low 2-Minute Step: aHR 25.0 <sup>¥</sup> ; p-value: 0.33                       | 2-Minute Step was not associated with major adverse cardiovascular events.                     |
| Tsai, 2017 <sup>122</sup>                            | 161  | Handgrip Strength (HGS) | 2.4 years <sup>¶</sup> | High HGS (ref) vs. Low HGS: aHR 1.01 (0.88 - 1.15) <sup>¥</sup>                                             | HGS was not associated with major adverse cardiovascular events.                               |
| Tsai, 2017 <sup>122</sup>                            | 161  | 30-Second Chair Stand   | 2.4 years <sup>¶</sup> | Per one decrease of the time of 30-Second Chair Stand: aHR 1.54 (1.12 - 2.13) <sup>¥</sup>                  | Chair stand performance was associated with ↑ risk for major adverse cardiovascular events.    |
| <b>Incident Dialysis Patients</b>                    |      |                         |                        |                                                                                                             |                                                                                                |
| Functional Status Tools                              |      |                         |                        |                                                                                                             |                                                                                                |
| Inaguma, 2016                                        | 1496 | Barthel Index (BI)      | 3.3 years <sup>¶</sup> | High BI (score = 100; ref) vs. Middle BI (75≤BI<100) vs. Low BI (<75): Log rank p-value <0.001 <sup>d</sup> | Lower functional status was associated with higher cardiovascular disease-related mortality.   |
| <b>Chronic Dialysis Patients</b>                     |      |                         |                        |                                                                                                             |                                                                                                |
| Frailty Tools, overall frailty or individual domains |      |                         |                        |                                                                                                             |                                                                                                |
| Ng, 2016 <sup>90</sup>                               | 193  | Frailty Score           | 1.9 years <sup>¶</sup> | Number of hospitalizations related to cardiovascular events: β=0.37, p-value <0.0001 <sup>al</sup>          | Frailty Score was associated with number of hospitalizations related to cardiovascular events. |



|                             |     |                           |                         |                                                                                                                                                                                                                          |                                                                                                                                                      |
|-----------------------------|-----|---------------------------|-------------------------|--------------------------------------------------------------------------------------------------------------------------------------------------------------------------------------------------------------------------|------------------------------------------------------------------------------------------------------------------------------------------------------|
| Chan, 2020                  | 267 | Frailty Score             | 2 years                 | Cardiovascular mortality<br>Not Frail (ref) vs. Frail: aHR 2.65 (1.13 - 6.20) <sup>a</sup><br><br>Cardiovascular event-related hospitalization<br>Not Frail (ref) vs. Frail: aβ Not reported; p-value >0.05 <sup>a</sup> | Frailty was associated with ↑ risk of cardiovascular mortality.<br><br>Frailty was not associated with cardiovascular event-related hospitalization. |
| Kim, 2017 <sup>57</sup>     | 142 | Sarcopenia Status         | 4.3 years <sup>◊</sup>  | No Sarcopenia (ref) vs. Sarcopenia: aHR 4.33 (1.51 - 12.43)                                                                                                                                                              | Sarcopenia was associated with ↑ risk of cardiovascular events.                                                                                      |
| Song, 2020                  | 88  | Sarcopenia Status         | 5.2 years <sup>◊</sup>  | No Sarcopenia (ref) vs. Sarcopenia: aHR 7.71 (1.83 - 32.57)                                                                                                                                                              | Sarcopenia was associated with ↑ risk of cardiovascular mortality.                                                                                   |
| Kuki, 2019 <sup>63</sup>    | 173 | Gait Speed                | 2 years                 | High (ref) vs. Low: aHR 2.29 (1.20 - 4.33)                                                                                                                                                                               | Low gait speed was associated with ↑ risk of cardiovascular events.                                                                                  |
| Torino, 2014 <sup>120</sup> | 296 | 6-Minute Walk Test (6MWT) | 3.3 years <sup>‡</sup>  | Per 100m decrease: aHR 1.22 (0.95 - 1.61) <sup>†¥€</sup>                                                                                                                                                                 | Shorter walk distance was not associated with fatal and non-fatal cardiovascular events.                                                             |
| Wang, 2005                  | 180 | HGS                       | 2.5 years <sup>◊¶</sup> | Per 1kg decrease: aHR 1.06 (1.02 - 1.11) <sup>†¥</sup>                                                                                                                                                                   | Decreasing HGS was associated with ↑ risk of cardiovascular mortality.                                                                               |
| Wang, 2010                  | 218 | HGS                       | 4 years                 | Per 1kg decrease: aHR 1.04 (1.01 - 1.06) <sup>b¥</sup>                                                                                                                                                                   | Decreasing HGS was associated with ↑ risk for developing circulatory congestion.                                                                     |
| Kim, 2017 <sup>57</sup>     | 142 | HGS                       | 4.3 years <sup>◊</sup>  | Appropriate Strength (ref) vs. Low Strength: aHR 4.09 (1.26 - 13.29)                                                                                                                                                     | Lower HGS was associated with ↑ risk for cardiovascular events.                                                                                      |
| Kuki, 2019 <sup>63</sup>    | 173 | HGS                       | 2 years                 | High (ref) vs. Low: aHR 2.15 (1.00 - 5.04)                                                                                                                                                                               | Low HGS was associated with ↑ risk of cardiovascular events.                                                                                         |

|              |      |                                         |                         |                                                                                                                                                                              |                                                                                                  |
|--------------|------|-----------------------------------------|-------------------------|------------------------------------------------------------------------------------------------------------------------------------------------------------------------------|--------------------------------------------------------------------------------------------------|
| Zhang, 2020  | 174  | Biceps Muscle Strength                  | 1 year <sup>¶</sup>     | High (ref) vs. Low: aHR 2.50 (1.01 - 6.25) <sup>†‡</sup><br>Per 1kg decrease: aHR 1.15 (1.01 - 1.33) <sup>†‡</sup>                                                           | Low biceps muscle strength was associated with ↑ risk of non-mortal cardiovascular events.       |
| Koyama, 2010 | 788  | Fukuda Fatigue Scale                    | 2.2 years <sup>‡¶</sup> | Normal (ref) vs. Highly fatigued: aHR 1.89 (1.06 - 3.36) <sup>a†</sup>                                                                                                       | High fatigue was associated with ↑ risk for cardiovascular events.                               |
| Jhamb, 2011  | 1798 | SF-36 Vitality Scale                    | 2.8 years <sup>◊</sup>  | High vitality (Q4; ref) vs.:<br>Q3: aHR 0.93 (0.78 - 1.19) <sup>†</sup><br>Q2: aHR 1.09 (0.90 - 1.33) <sup>†</sup><br>Low vitality (Q1): aHR 1.27 (1.04 - 1.56) <sup>†</sup> | Increasing fatigue was associated with ↑ risk of first cardiac hospitalization or cardiac death. |
| Kang, 2017   | 1611 | Physical Activity – WHO Recommendations | 500 days                | Active (ref) vs.:<br>Intermediate: RR 1.57 (0.48 – 5.06)*<br>Inactive: RR 2.99 (1.05 – 8.56)*                                                                                | Physical inactivity was associated with ↑ risk of cardiovascular death.                          |

### Kidney Function

#### CKD Non-Dialysis Patients

##### Frailty Tools, overall frailty or individual domains

|            |     |                                   |                        |                                                                                                                           |                                                                             |
|------------|-----|-----------------------------------|------------------------|---------------------------------------------------------------------------------------------------------------------------|-----------------------------------------------------------------------------|
| Ali, 2018  | 104 | Combined PRISMA / Timed Up-and-Go | 1.7 years <sup>¶</sup> | Not Frail vs. Frail: log rank p-value Not reported <sup>d</sup>                                                           | Frailty was not associated with time to initiation of dialysis.             |
| Veza, 2019 | 115 | Frailty Index                     | 1 year <sup>¶</sup>    | Not Frail (ref) vs. Frail: aOR 5.42 (1.06 - 27.64) <sup>†</sup><br>Per unit decrease: aOR 1.05 (0.98 - 1.11) <sup>†</sup> | Frailty was associated with ↑ odds of renal replacement therapy initiation. |

|                              |     |                                                                |                        |                                                                                                                                                                  |                                                                                                                         |
|------------------------------|-----|----------------------------------------------------------------|------------------------|------------------------------------------------------------------------------------------------------------------------------------------------------------------|-------------------------------------------------------------------------------------------------------------------------|
| Kruse, 2020                  | 351 | Skeletal Muscle Mass Index (SMI)                               | 7 years                | Normal (ref) vs. Low SMI:<br>Men: aRR not reported; p-value Not reported<br>Women: aRR not reported; p-value Not reported                                        | Lower SMI was not associated with rapid kidney function decline in either men or women.                                 |
| de Goeij, 2014 <sup>23</sup> | 436 | Revised Illness Perception Questionnaire (IPQ-R) - Weight Loss | 0.5 years <sup>¶</sup> | No Weight Loss (ref) vs. Weight Loss: aHR 1.33 (0.99 – 1.77)                                                                                                     | Weight loss was not associated with starting dialysis.                                                                  |
| Tsai, 2017 <sup>122</sup>    | 161 | 2-Minute Step                                                  | 2.4 years <sup>¶</sup> | High 2-Minute Step (ref) vs. Low 2-Minute Step: aHR 25.0 (1.05 – 100.0) <sup>¥</sup>                                                                             | Lower 2-Minute Step was associated with ↑ risk for commencing dialysis.                                                 |
| Tsai, 2017 <sup>122</sup>    | 161 | HGS                                                            | 2.4 years <sup>¶</sup> | High HGS (ref) vs Low HGS: aHR 1.12 (1.04 - 1.19) <sup>†¥</sup>                                                                                                  | Lower HGS was associated with ↑ risk for commencing dialysis.                                                           |
| Watson, 2020                 | 89  | Leg Extension Strength                                         | 3.3 years <sup>◇</sup> | Per 1kg decrease: aHR 1.02 (0.98 - 1.05) <sup>¥</sup>                                                                                                            | Muscle strength was not associated with the development of ESRD.                                                        |
| Tsai, 2017 <sup>122</sup>    | 161 | 30-Second Chair Stand                                          | 2.4 years <sup>¶</sup> | Per one decrease of the time of 30-Second Chair Stand: aHR 0.98 (0.85 - 1.14) <sup>¥</sup>                                                                       | Chair stand performance was not associated with commencing dialysis.                                                    |
| de Goeij, 2014 <sup>23</sup> | 436 | IPQ-R - Loss of Strength                                       | 0.5 years <sup>¶</sup> | No Loss of Strength (ref) vs. Loss of Strength: aHR 1.20 (0.89 – 1.64)                                                                                           | Loss of strength was not associated with starting dialysis.                                                             |
| de Goeij, 2014 <sup>23</sup> | 436 | IPQ-R - Fatigue                                                | 0.5 years <sup>¶</sup> | No Fatigue (ref) vs. Fatigue: aHR 1.48 (0.94 – 2.31)                                                                                                             | Fatigue was not associated with starting dialysis.                                                                      |
| Robinson-Cohen, 2014         | 256 | Four Week Physical Activity History Questionnaire              | 3.0 years <sup>‡</sup> | Any Physical Activity (ref) vs. No Physical Activity: aHR 0.98 (0.43 - 2.22) <sup>†¥</sup><br><br>Per 60 min/week decrease: aHR 1.02 (0.88 – 1.18) <sup>†¥</sup> | Physical activity was not associated with ESRD events (i.e., initiation of chronic dialysis or kidney transplantation). |

|                                                                              |      |                                                         |                        |                                                                                                                                                                        |                                                                                                                     |
|------------------------------------------------------------------------------|------|---------------------------------------------------------|------------------------|------------------------------------------------------------------------------------------------------------------------------------------------------------------------|---------------------------------------------------------------------------------------------------------------------|
| Rampersad, 2021                                                              | 569  | Physical Activity Scale for the Elderly                 | 903 days <sup>‡</sup>  | Light Activity (ref) vs. Low Activity: aHR 0.71 (0.48 - 1.06) <sup>†‡</sup><br><br>Moderate-High Activity (ref) vs. Low Activity: aHR 0.83 (0.55 - 1.27) <sup>†‡</sup> | Physical activity was not associated with risk of progression to kidney failure.                                    |
| <b>Functional Status</b>                                                     |      |                                                         |                        |                                                                                                                                                                        |                                                                                                                     |
| Ritchie, 2014                                                                | 1515 | Karnofsky Performance Scale (KPS)                       | 2.9 years <sup>‡</sup> | KPS 100 (ref) vs KPS ≤ 80: aHR 1.50 (0.94 - 2.48) <sup>a</sup>                                                                                                         | Lower KPS was not associated with progression to renal replacement therapy.                                         |
| de Goeij, 2014 <sup>23</sup>                                                 | 436  | SF-36 Physical Component Summary (PCS)                  | 0.5 years <sup>¶</sup> | Per 10-point decrease: aHR 1.14 (1.07 - 1.21) <sup>€</sup>                                                                                                             | Decreasing PCS was associated with ↑ risk of starting dialysis.                                                     |
| <b>Composite: Death or Dialysis Initiation/Transplantation/Reaching ESRD</b> |      |                                                         |                        |                                                                                                                                                                        |                                                                                                                     |
| <b>CKD Non-Dialysis Patients</b>                                             |      |                                                         |                        |                                                                                                                                                                        |                                                                                                                     |
| Frailty Tools, overall frailty or individual domains                         |      |                                                         |                        |                                                                                                                                                                        |                                                                                                                     |
| Roshanravan, 2012 <sup>103</sup>                                             | 336  | Fried Frailty Index [modified exhaustion, low activity] | 967 days <sup>‡</sup>  | Not Frail (ref) vs. Frail: aHR 2.50 (1.40 - 4.40) <sup>†</sup>                                                                                                         | Frailty was associated with ↑ risk of death or dialysis therapy.                                                    |
| Mansur, 2015                                                                 | 57   | Johansen Frailty Criteria [modified Fried and Woods]    | 1 year <sup>¶</sup>    | Not Frail (ref) vs Frail: aHR 2.50 (1.04 - 6.10)                                                                                                                       | Frailty was associated with ↑ risk of negative health outcomes (i.e., death or start of renal replacement therapy). |
| de Goeij, 2014 <sup>23</sup>                                                 | 436  | IPQ-R - Weight Loss                                     | 0.5 years <sup>¶</sup> | No Weight Loss (ref) vs. Weight Loss: aHR 1.20 (0.93 - 1.55)                                                                                                           | Weight loss was not associated with combined poor health outcome (i.e., dialysis, transplantation, and death).      |
| Roshanravan, 2012 <sup>103</sup>                                             | 336  | Weight Loss                                             | 967 days <sup>‡</sup>  | No Weight Loss (ref) vs. Weight Loss: aHR 3.20 (1.60 - 6.30) <sup>†</sup>                                                                                              | Weight loss was associated with ↑ risk of death or dialysis therapy.                                                |

|                                  |     |                          |                        |                                                                                                                                                                                                                                                    |                                                                                                                         |
|----------------------------------|-----|--------------------------|------------------------|----------------------------------------------------------------------------------------------------------------------------------------------------------------------------------------------------------------------------------------------------|-------------------------------------------------------------------------------------------------------------------------|
| Roshanravan, 2012 <sup>103</sup> | 336 | Gait Speed               | 967 days <sup>‡</sup>  | Normal Walk Speed (ref) vs. Slow Walk Speed: aHR 1.80 (1.10 - 3.20) <sup>†</sup>                                                                                                                                                                   | Slow walk speed was associated with ↑ risk of death or dialysis therapy.                                                |
| Chang, 2011                      | 128 | HGS                      | 2.8 years <sup>¶</sup> | Men<br>HGS > 24.65kgw (ref) vs. HGS < 24.65kgw: aHR 4.57 (1.13 – 17.08) <sup>a†</sup><br><br>Women<br>HGS > 10.15kgw (ref) vs. HGS < 10.15kgw: aHR 5.94 (1.10 – 32.19) <sup>a†</sup><br><br>Per 1kg decrease: aHR 1.11 (1.03 - 1.19) <sup>†‡</sup> | Decreasing HGS was associated with ↑ risk of composite renal end point (i.e., pre-dialysis mortality or reaching ESRD). |
| Roshanravan, 2012 <sup>103</sup> | 336 | HGS                      | 967 days <sup>‡</sup>  | Strong Grip (ref) vs. Weak Grip: aHR 1.70 (0.90 - 3.10) <sup>†</sup>                                                                                                                                                                               | Weak grip was not associated with death or dialysis therapy.                                                            |
| de Goeij, 2014 <sup>23</sup>     | 436 | IPQ-R - Loss of Strength | 0.5 years <sup>¶</sup> | No Loss of Strength (ref) vs. Loss of Strength: aHR 1.25 (0.95 - 1.65)                                                                                                                                                                             | Loss of strength was not associated with combined poor health outcome (i.e., dialysis, transplantation, and death).     |
| de Goeij, 2014 <sup>23</sup>     | 436 | IPQ-R - Fatigue          | 0.5 years <sup>¶</sup> | No Fatigue (ref) vs. Fatigue: aHR 1.33 (0.90 - 1.97)                                                                                                                                                                                               | Fatigue was not associated with combined poor health outcome (i.e., dialysis, transplantation, and death).              |
| Roshanravan, 2012 <sup>103</sup> | 336 | SF-36 Vitality Scale     | 967 days <sup>‡</sup>  | No Fatigue (ref) vs. Fatigue: aHR 1.20 (0.70 - 1.90) <sup>†</sup>                                                                                                                                                                                  | Fatigue was not associated with death or dialysis therapy.                                                              |

|                                                                               |      |                                                      |                         |                                                                                                     |                                                                                                                         |
|-------------------------------------------------------------------------------|------|------------------------------------------------------|-------------------------|-----------------------------------------------------------------------------------------------------|-------------------------------------------------------------------------------------------------------------------------|
| Roshanravan, 2012 <sup>103</sup>                                              | 336  | Physical Activity                                    | 967 days <sup>‡</sup>   | High Physical Activity (ref) vs. Low Physical Activity: aHR 2.10 (1.30 - 3.30) <sup>†</sup>         | Low physical activity was associated with ↑ risk of death or dialysis therapy.                                          |
| <b>Functional Status Tools</b>                                                |      |                                                      |                         |                                                                                                     |                                                                                                                         |
| de Goeij, 2014 <sup>23</sup>                                                  | 436  | SF-36 PCS                                            | 0.5 years <sup>¶</sup>  | Per 10-point decrease: aHR 1.14 (1.07 – 1.21) <sup>€</sup>                                          | Decreasing PCS was associated with ↑ risk of combined poor health outcome (i.e., dialysis, transplantation, and death). |
| <b>Composite: Death or Hospitalization (all-cause or cardiovascular only)</b> |      |                                                      |                         |                                                                                                     |                                                                                                                         |
| <b>Incident Dialysis Patients</b>                                             |      |                                                      |                         |                                                                                                     |                                                                                                                         |
| Frailty Tools, overall frailty or individual domains                          |      |                                                      |                         |                                                                                                     |                                                                                                                         |
| Johansen, 2007 <sup>48</sup>                                                  | 2275 | Johansen Frailty criteria [modified Fried and Woods] | 1 year                  | Not Frail (ref) vs. Frail: aHR 1.56 (1.36 – 1.79) <sup>†</sup>                                      | Frailty was associated with ↑ risk of mortality or hospitalization.                                                     |
| Lee, 2017                                                                     | 46   | Multidimensional Frailty Score                       | 1.5 years <sup>‡¶</sup> | Not Frail (ref) vs Frail: aHR 23.58 (1.61 - 346.03)<br>Per 1-point increase: aHR 1.63 (1.01 – 2.65) | Frailty was associated with ↑ risk of all-cause death or cardiovascular hospitalization.                                |
| Johansen, 2007 <sup>48</sup>                                                  | 2275 | SF-36 Vitality Scale                                 | 1 year                  | Score ≥55 (ref) vs. <55: aHR 1.26 (1.10 – 1.45) <sup>†</sup>                                        | Fatigue was associated with ↑ risk of mortality or hospitalization.                                                     |
| Johansen, 2007 <sup>48</sup>                                                  | 2275 | Physical Activity                                    | 1 year                  | Active (ref) vs. Inactive: aHR 1.20 (1.07 – 1.35) <sup>†</sup>                                      | Inactivity was associated with ↑ risk of mortality or hospitalization.                                                  |
| <b>Functional Status Tools</b>                                                |      |                                                      |                         |                                                                                                     |                                                                                                                         |
| Johansen, 2007 <sup>48</sup>                                                  | 2275 | SF-36 Physical Function (PF) Scale                   | 1 year                  | Score ≥75 (ref) vs. <75: aHR 1.41 (1.19 – 1.66) <sup>†</sup>                                        | Lower PF is associated with ↑ risk of mortality or hospitalization.                                                     |

| <b>Chronic Dialysis Patients</b>                       |      |                                            |                        |                                                                   |                                                                                                                                 |
|--------------------------------------------------------|------|--------------------------------------------|------------------------|-------------------------------------------------------------------|---------------------------------------------------------------------------------------------------------------------------------|
| Frailty Tools, overall frailty or individual domains   |      |                                            |                        |                                                                   |                                                                                                                                 |
| Lin, 2020 <sup>73</sup>                                | 126  | Gait Speed                                 | 3 years                | Per 0.1 m/s decrease: aHR 1.05 (0.98 - 1.12) <sup>¥€</sup>        | Gait speed was not associated with risk of all-cause mortality/hospitalization.                                                 |
| Torino, 2014 <sup>120</sup>                            | 296  | 6MWT                                       | 3.3 years <sup>‡</sup> | Per 100m decrease: aHR 1.34 (1.10 - 1.61) <sup>†¥€</sup>          | Shorter walk distance was associated with ↑ risk of mortality, fatal and non-fatal cardiovascular events, and hospitalizations. |
| Lin, 2020 <sup>73</sup>                                | 126  | HGS                                        | 3 years                | Per 1kg decrease: aHR 1.01 (0.98 - 1.03) <sup>¥</sup>             | HGS was not associated with risk of all-cause mortality/hospitalization.                                                        |
| <b>Composite: Mortality or Cardiovascular Outcomes</b> |      |                                            |                        |                                                                   |                                                                                                                                 |
| <b>Chronic Dialysis Patients</b>                       |      |                                            |                        |                                                                   |                                                                                                                                 |
| Frailty Tools, overall frailty or individual domains   |      |                                            |                        |                                                                   |                                                                                                                                 |
| Yamamoto, 2021 <sup>138</sup>                          | 542  | Sarcopenia (Creatinine Index + Gait Speed) | 3.0 years <sup>‡</sup> | No Sarcopenia (ref) vs. Sarcopenia: aIRR 2.08 (1.31 - 3.33)       | Sarcopenia was associated with ↑ risk of mortality and/or cardiovascular hospitalizations.                                      |
| Yamamoto, 2021 <sup>138</sup>                          | 542  | Sarcopenia (Creatinine Index + HGS)        | 3.0 years <sup>‡</sup> | No Sarcopenia (ref) vs. Sarcopenia: aIRR 1.83 (1.40 - 2.39)       | Sarcopenia was associated with ↑ risk of mortality and/or cardiovascular hospitalizations.                                      |
| Yamamoto, 2021 <sup>138</sup>                          | 542  | Gait Speed                                 | 3.0 years <sup>‡</sup> | Per 0.1m/s decrease: aIRR 1.1 (1.04 – 1.16) <sup>¥€</sup>         | Lower gait speed was associated with ↑ risk of mortality and/or cardiovascular hospitalizations.                                |
| Yamamoto, 2021 <sup>138</sup>                          | 542  | HGS                                        | 3.0 years <sup>‡</sup> | Per 1kg decrease: aIRR 1.04 (1.03 – 1.05) <sup>¥€</sup>           | Decrease in HGS was associated with ↑ risk of mortality and/or cardiovascular hospitalizations.                                 |
| Kurita, 2019                                           | 3667 | SF-12 Vitality Scale                       | 2.7 years <sup>‡</sup> | Per 1-energy level lowerer: aIRR 1.18 (1.09 – 1.27) <sup>†¥</sup> | Lower energy was associated with ↑ risk of all-cause mortality/cardiovascular hospitalizations.                                 |

| Functional Status Tools                                        |     |                                                                    |                        |                                                                                                                                                                                                                                                    |                                                                                                                           |
|----------------------------------------------------------------|-----|--------------------------------------------------------------------|------------------------|----------------------------------------------------------------------------------------------------------------------------------------------------------------------------------------------------------------------------------------------------|---------------------------------------------------------------------------------------------------------------------------|
| Lee, 2020                                                      | 277 | Physical Performance                                               | 2.1 years <sup>¶</sup> | Normal gait speed/Normal HGS (ref) vs.<br>Normal gait speed/Low HGS:<br>aHR 1.08 (0.49 – 2.39) <sup>†</sup><br>Low gait speed/Normal HGS:<br>aHR 2.38 (0.86 – 6.53) <sup>†</sup><br>Low gait speed/Low HGS:<br>aHR 2.72 (1.14 – 6.46) <sup>†</sup> | Low physical performance (combined low gait speed and HGS) was associated with ↑ risk of mortality/cardiovascular events. |
| Composite: Mortality or Hospitalization or Progression to ESRD |     |                                                                    |                        |                                                                                                                                                                                                                                                    |                                                                                                                           |
| CKD Non-Dialysis Patients                                      |     |                                                                    |                        |                                                                                                                                                                                                                                                    |                                                                                                                           |
| Frailty Tools, overall frailty or individual domains           |     |                                                                    |                        |                                                                                                                                                                                                                                                    |                                                                                                                           |
| Gregg, 2019 <sup>34</sup>                                      | 262 | Beck Depression Inventory-I – Fatigue                              | 1 year <sup>¶</sup>    | No Fatigue (ref) vs. Fatigue:<br>aHR 0.88 (0.52 - 1.50) <sup>a†</sup>                                                                                                                                                                              | Fatigue was not associated with risk of mortality/hospitalization/progression to ESRD.                                    |
| Gregg, 2019 <sup>34</sup>                                      | 262 | Quick Inventory of Depressive Symptomatology-Self Report – Fatigue | 1 year <sup>¶</sup>    | No Fatigue (ref) vs. Fatigue:<br>aHR 1.35 (0.84 - 2.19) <sup>a†</sup>                                                                                                                                                                              | Fatigue was not associated with risk of mortality/hospitalization/progression to ESRD.                                    |
| Gregg, 2019 <sup>34</sup>                                      | 262 | SF-12 Vitality Scale                                               | 1 year <sup>¶</sup>    | Per 1-point increase: aHR 1.06 (0.92 - 1.23) <sup>a†</sup>                                                                                                                                                                                         | Fatigue was not associated with risk of mortality/hospitalization/progression to ESRD.                                    |
| Composite: Mortality or Functional Status Decline              |     |                                                                    |                        |                                                                                                                                                                                                                                                    |                                                                                                                           |
| Incident Dialysis Patients                                     |     |                                                                    |                        |                                                                                                                                                                                                                                                    |                                                                                                                           |
| Frailty Tools, overall frailty or individual domains           |     |                                                                    |                        |                                                                                                                                                                                                                                                    |                                                                                                                           |
| Goto, 2019 <sup>33</sup>                                       | 187 | Fried Frailty Index                                                | 0.5 years <sup>¶</sup> | Not Frail (ref) vs. Frail: aOR 1.46 (0.80 - 2.68)                                                                                                                                                                                                  | Frailty was not associated with odds of mortality/functional decline.                                                     |
| Goto, 2019 <sup>33</sup>                                       | 187 | Geriatric Assessment                                               | 0.5 years <sup>¶</sup> | Not Frail (ref) vs. Frail: aOR 1.65 (0.81 - 3.35)                                                                                                                                                                                                  | Frailty was not associated with odds of mortality/functional decline.                                                     |



|                                                      |     |                                                                         |                         |                                                                                                                            |                                                                               |
|------------------------------------------------------|-----|-------------------------------------------------------------------------|-------------------------|----------------------------------------------------------------------------------------------------------------------------|-------------------------------------------------------------------------------|
| Goto, 2019 <sup>33</sup>                             | 187 | Groningen Frailty Indicator                                             | 0.5 years <sup>¶</sup>  | Not Frail (ref) vs. Frail: aOR 1.97 (1.05 - 3.68)                                                                          | Frailty was associated with ↑ odds of mortality/functional decline.           |
| Goto, 2019 <sup>33</sup>                             | 177 | Timed Up-and-Go                                                         | 0.5 years <sup>¶</sup>  | Not Impaired (ref) vs. Impaired: aOR 1.53 (0.67 - 3.47)                                                                    | Impairment was not associated with odds of mortality/functional decline.      |
| <b>Functional Status Tools</b>                       |     |                                                                         |                         |                                                                                                                            |                                                                               |
| Goto, 2019 <sup>33</sup>                             | 187 | Katz' Activities of Daily Living (ADL)                                  | 0.5 years <sup>¶</sup>  | Independent (ref) vs. Dependent: OR 1.27 (0.68 - 2.38) <sup>d</sup>                                                        | Dependence was not associated with odds of mortality/functional decline.      |
| Goto, 2019 <sup>33</sup>                             | 187 | Lawton and Brody's Instrumental Activities of Daily Living (IADL) Scale | 0.5 years <sup>¶</sup>  | Independent (ref) vs. Dependent: OR 1.21 (0.60 - 2.43) <sup>d</sup>                                                        | Dependence was not associated with odds of mortality/functional decline.      |
| Goto, 2019 <sup>33</sup>                             | 187 | Functional Status Score (ADL & IADL)                                    | 0.5 years <sup>¶</sup>  | Independent (ref) vs.:<br>Mild/Moderate Dependence: RR 1.17 (0.77-1.77)*<br>Severe Dependence: RR 1.11 (0.69-1.76)*        | Functional Status Score was not associated with mortality/functional decline. |
| <b>Peritonitis</b>                                   |     |                                                                         |                         |                                                                                                                            |                                                                               |
| <b>Chronic Dialysis Patients</b>                     |     |                                                                         |                         |                                                                                                                            |                                                                               |
| Frailty Tools, overall frailty or individual domains |     |                                                                         |                         |                                                                                                                            |                                                                               |
| Ng, 2016 <sup>90</sup>                               | 193 | Frailty Score                                                           | 1.9 years <sup>¶¶</sup> | Not Frail (ref) vs.:<br>Mild: RR 1.04 (0.64 – 1.68)*<br>Moderate: RR 0.85 (0.46 – 1.58)*<br>Severe: RR 0.89 (0.51 – 1.55)* | Frailty was not associated with developing peritonitis.                       |
| Shi, 2017                                            | 145 | 6MWT                                                                    | 1.9 years <sup>‡¶</sup> | Long (ref) vs. Short 6MWT:<br>Log rank p-value= 0.37 <sup>d</sup>                                                          | Walk distance was not associated with peritonitis-free survival.              |

| Functional Status Tools     |       |                                      |                         |                                                                                                                                                                                                                       |                                                                                   |
|-----------------------------|-------|--------------------------------------|-------------------------|-----------------------------------------------------------------------------------------------------------------------------------------------------------------------------------------------------------------------|-----------------------------------------------------------------------------------|
| Anderson, 1997 <sup>3</sup> | 109   | ADL Score                            | 1.1 year <sup>¶</sup>   | ADL score: aHR Not reported; p-value Not reported <sup>†</sup>                                                                                                                                                        | ADL score was not associated with time to development of first peritonitis.       |
| Withdrawal from Dialysis    |       |                                      |                         |                                                                                                                                                                                                                       |                                                                                   |
| Incident Dialysis Patients  |       |                                      |                         |                                                                                                                                                                                                                       |                                                                                   |
| Functional Status Tools     |       |                                      |                         |                                                                                                                                                                                                                       |                                                                                   |
| Wetmore, 2019               | 80284 | Functional Status Score              | 0.5 years <sup>¶</sup>  | Score ≤ 0 (high functional status) (ref):<br>Score 1-2: aOR 1.41 (1.25 - 1.58)<br>Score 3-4: aOR 1.60 (1.40 - 1.82)<br>Score 5-6: aOR 1.79 (1.46 - 2.19)<br>Score ≥ 7 (low functional status): aOR 1.83 (1.35 - 2.48) | Lower functional status was associated with ↑ odds of dialysis withdrawal.        |
| Chronic Dialysis Patients   |       |                                      |                         |                                                                                                                                                                                                                       |                                                                                   |
| Functional Status Tools     |       |                                      |                         |                                                                                                                                                                                                                       |                                                                                   |
| Bordenave, 1998             | 304   | ADL                                  | 21 years                | No Restriction/Moderate Restriction (ref) vs. Severe Restriction: aOR 3.36 (CI not reported); p-value =0.0003 <sup>c</sup>                                                                                            | Severe restriction of ADL was associated with ↑ odds of withdrawal from dialysis. |
| Jassal, 2016                | 3583  | Functional Status Score (ADL & IADL) | 1.4 years <sup>‡¶</sup> | Functionally Independent (Score=13; ref) vs. Most Dependent (Score<8): aHR 2.02 (1.45 - 2.80)                                                                                                                         | Lower functional status was associated with ↑ risk of dialysis withdrawal.        |

| <b>Serious Fall Injuries</b>                         |       |                                                        |                        |                                                                                                                                  |                                                                                                                                         |
|------------------------------------------------------|-------|--------------------------------------------------------|------------------------|----------------------------------------------------------------------------------------------------------------------------------|-----------------------------------------------------------------------------------------------------------------------------------------|
| <b>Incident Dialysis Patients</b>                    |       |                                                        |                        |                                                                                                                                  |                                                                                                                                         |
| Frailty Tools, overall frailty or individual domains |       |                                                        |                        |                                                                                                                                  |                                                                                                                                         |
| Delgado, 2015 <sup>26</sup>                          | 1053  | Frailty, self-report [modified Fried, Woods, Johansen] | 2.5 years <sup>‡</sup> | Not Frail (ref) vs. Frail: aHR 1.60 (1.16 - 2.20)                                                                                | Frailty was associated with ↑ risk of fall or fracture.                                                                                 |
| Delgado, 2015 <sup>26</sup>                          | 1053  | Exhaustion                                             | 2.5 years <sup>‡</sup> | No Exhaustion (ref) vs. Exhaustion: aHR 1.40 (1.10 – 1.76)                                                                       | Exhaustion was associated with ↑ risk of fall or fracture.                                                                              |
| Delgado, 2015 <sup>26</sup>                          | 1053  | Human Activity Profile – Adjusted Activity Score       | 2.5 years <sup>‡</sup> | Quintiles 2-5 (ref) vs. Quintile 1 (lowest): aHR 1.36 (0.78 – 2.37)                                                              | Physical activity was not associated with falls or fractures.                                                                           |
| Functional Status Tools                              |       |                                                        |                        |                                                                                                                                  |                                                                                                                                         |
| Plantinga, 2017                                      | 81653 | Functional Status – Form CMS-2728                      | 1 year                 | Does not need assistance with ADL's: 1.75 (1.68-1.82) <sup>d</sup><br>Needs assistance with ADL's: 1.27 (1.18-1.36) <sup>d</sup> | The risk of serious fall injuries in the post- versus pre-dialysis therapy were ↑ among patients who did not need assistance with ADL's |
| Delgado, 2015 <sup>26</sup>                          | 1053  | SF-12 PF Scale                                         | 2.5 years <sup>‡</sup> | Score ≥ 75 (ref) vs. Score < 75: aHR 1.33 (1.01 – 1.75)                                                                          | Poor physical function was associated with ↑ risk of fall or fracture.                                                                  |
| <b>Discharged</b>                                    |       |                                                        |                        |                                                                                                                                  |                                                                                                                                         |
| <b>Chronic Dialysis Patients</b>                     |       |                                                        |                        |                                                                                                                                  |                                                                                                                                         |
| Functional Status Tools                              |       |                                                        |                        |                                                                                                                                  |                                                                                                                                         |
| Anderson, 1997 <sup>3</sup>                          | 109   | Activity of Daily Living Score                         | 1.1 year <sup>¶¶</sup> | Score < 8 (ref) vs. Score ≥ 8: OR 0.24 (0.08 – 0.73) <sup>d¶¶</sup>                                                              | Lower functional status was associated with ↓ odds of being discharged from assisted care.                                              |

|                                                      |         |                                                  |                        |                                                                                                                                  |                                                                                                                 |
|------------------------------------------------------|---------|--------------------------------------------------|------------------------|----------------------------------------------------------------------------------------------------------------------------------|-----------------------------------------------------------------------------------------------------------------|
| Sood, 2011 <sup>113</sup>                            | 1286    | Katz' ADL                                        | 7.5 days <sup>‡</sup>  | Normal or Mild Impairment (ref) vs.:<br>Moderate Impairment: aHR 0.67 (0.58 - 0.79)<br>Marked Impairment: aHR 0.47 (0.39 - 0.56) | Moderate or marked impairment was associated with ↓ risk of being discharged home.                              |
| <b>Discharge to Assisted Care</b>                    |         |                                                  |                        |                                                                                                                                  |                                                                                                                 |
| <b>Chronic Dialysis Patients</b>                     |         |                                                  |                        |                                                                                                                                  |                                                                                                                 |
| Frailty Tools, overall frailty or individual domains |         |                                                  |                        |                                                                                                                                  |                                                                                                                 |
| Jiang, 2020                                          | 1424026 | Frailty (Johns Hopkins Adjusted Clinical Groups) | Not reported           | Not Frail (ref) vs. Frail: aOR 3.55 (3.49 - 3.61)                                                                                | Frailty was associated with ↑ odds of being discharged from hospital to an assisted care facility.              |
| Functional Status Tools                              |         |                                                  |                        |                                                                                                                                  |                                                                                                                 |
| Sood, 2011 <sup>113</sup>                            | 1036    | Katz' ADL                                        | 7.5 days <sup>‡</sup>  | Per 1-point change towards more impaired: aOR 1.25 (1.15 - 1.37) <sup>a</sup>                                                    | Increased impairment in functional status was associated with ↑ odds of discharge to an assisted care facility. |
| <b>Transplant</b>                                    |         |                                                  |                        |                                                                                                                                  |                                                                                                                 |
| <b>Chronic Dialysis Patients</b>                     |         |                                                  |                        |                                                                                                                                  |                                                                                                                 |
| Frailty Tools, overall frailty or individual domains |         |                                                  |                        |                                                                                                                                  |                                                                                                                 |
| Jegatheswaran, 2020                                  | 261     | FRAIL Questionnaire                              | 1.5 years <sup>¶</sup> | Not Frail/Pre-Frail (ref) vs. Frail: aHR 0.15 (0.02 - 1.15) <sup>a</sup>                                                         | Frailty was not associated with a decreased likelihood of kidney transplant.                                    |
| Functional Status Tools                              |         |                                                  |                        |                                                                                                                                  |                                                                                                                 |
| van Loon, 2017                                       | 679     | SF-36 PF Scale                                   | 2 years                | Good physical function vs.:<br>Intermediate: RR 1.04 (0.94 – 1.16)*<br>Poor: RR 1.24 (1.13 – 1.35)*                              | Poor physical function was associated with ↑ risk of not receiving a kidney transplant.                         |

| Single Study Outcomes                                |      |                             |                       |                                                                                                                                                                                                             |                                                                                                                              |
|------------------------------------------------------|------|-----------------------------|-----------------------|-------------------------------------------------------------------------------------------------------------------------------------------------------------------------------------------------------------|------------------------------------------------------------------------------------------------------------------------------|
| CKD Non-Dialysis Patients                            |      |                             |                       |                                                                                                                                                                                                             |                                                                                                                              |
| Frailty Tools, overall frailty or individual domains |      |                             |                       |                                                                                                                                                                                                             |                                                                                                                              |
| Meulendijks, 2015                                    | 63   | Groningen Frailty Indicator | 1 year                | Dialysis-Related Complications<br>Not Frail (ref) vs. Frail: RR 1.45 (0.77 – 2.74)*                                                                                                                         | Frailty was not associated with dialysis-related complications.                                                              |
| Chronic Dialysis Patients                            |      |                             |                       |                                                                                                                                                                                                             |                                                                                                                              |
| Functional Status Tools                              |      |                             |                       |                                                                                                                                                                                                             |                                                                                                                              |
| Sood, 2011 <sup>113</sup>                            | 1286 | Katz' ADL                   | 7.5 days <sup>‡</sup> | Composite: In-Hospital Mortality/Discharge to an Assisted Care Facility<br>Normal or Mild Impairment (ref) vs.:<br>Moderate Impairment: aHR 1.77 (1.05 - 2.98)<br>Marked Impairment: aHR 1.84 (1.10 - 3.10) | Moderate or marked impairment was associated with ↑ risk of in-hospital mortality OR discharge to an assisted care facility. |

§all models adjusted for a minimum of age and sex, unless otherwise noted. Where a choice of models exists, the most fully adjusted model is presented; <sup>a</sup>model not adjusted for sex; <sup>b</sup>model not adjusted for age; <sup>c</sup>model not adjusted for age or sex; <sup>d</sup>unadjusted model; <sup>†</sup>multiple adjusted models available; <sup>‡</sup>median; <sup>◊</sup>mean; <sup>¶</sup>converted to years; \*RR calculated from event data, or cumulative survival event data; <sup>¥</sup>scale inverted; <sup>€</sup>scale change; <sup>‡</sup>reference group and comparator not reported; unit of measure not clearly reported

**Abbreviations:** 6MWT, 6-Minute Walk Test; aβ, adjusted beta; ADL, Activities of Daily Living; aHR, adjusted hazard ratio; aIRR, adjusted incidence rate ratio; aOR, adjusted odds ratio; aRR, adjusted relative risk; BI, Barthel Index; CKD, chronic kidney disease; ESRD, end-stage renal disease; HGS, handgrip strength; IADL, Instrumental Activities of Daily Living; IPQ-R, Revised Illness Perception Questionnaire; IRR, incidence rate ratio; kgw, kilogram weight; KPS, Karnofsky Performance Scale; OR, odds ratio; PCS, Physical Component Summary; PF, Physical Function; Ref, reference value, RR, relative risk; SD, standard deviation; SMI, Skeletal Muscle Mass Index; WHO, World Health Organization

**Table S4.** Quality assessment of included studies based on the modified version of the QUIPS tool

| <b>Author, year</b>         | <b>1. Study Participation</b> | <b>2. Study Attrition</b> | <b>3. Prognostic Factor Measurement</b> | <b>4. Outcome Measurement</b> | <b>5. Study Confounding</b> | <b>6. Statistical Analysis and Reporting</b> |
|-----------------------------|-------------------------------|---------------------------|-----------------------------------------|-------------------------------|-----------------------------|----------------------------------------------|
| Alfaadhel, 2015             | +                             | +                         | /                                       | +                             | +                           | +                                            |
| Anderson, 1997              | /                             | +                         | /                                       | +                             | /                           | /                                            |
| Anderson, 1993              | /                             | /                         | /                                       | /                             | -                           | /                                            |
| Anderson, 1990              | +                             | +                         | -                                       | -                             | +                           | -                                            |
| Arai, 2014                  | +                             | +                         | +                                       | +                             | +                           | /                                            |
| Argyropoulos, 2009          | +                             | +                         | /                                       | +                             | +                           | +                                            |
| Bordenave, 1998             | /                             | +                         | -                                       | /                             | /                           | /                                            |
| Bossola, 2015               | /                             | /                         | /                                       | +                             | /                           | /                                            |
| Bossola, 2016               | +                             | +                         | /                                       | -                             | /                           | /                                            |
| Chandna, 1999               | +                             | +                         | -                                       | +                             | +                           | +                                            |
| Chang, 2011                 | +                             | +                         | /                                       | /                             | +                           | /                                            |
| Delgado, 2015 <sup>25</sup> | /                             | +                         | -                                       | +                             | +                           | +                                            |
| Delgado, 2015 <sup>26</sup> | /                             | +                         | /                                       | +                             | +                           | /                                            |
| DeOreo, 1997                | -                             | -                         | +                                       | /                             | +                           | -                                            |
| Farrokhi, 2013              | -                             | /                         | +                                       | /                             | +                           | /                                            |
| Freedman, 2001              | /                             | /                         | -                                       | +                             | +                           | /                                            |
| Lopez Revuelta, 2004        | /                             | +                         | +                                       | +                             | +                           | -                                            |
| Hellberg, 2014              | +                             | /                         | +                                       | +                             | +                           | +                                            |
| Ifudu, 1998                 | +                             | +                         | +                                       | +                             | +                           | -                                            |
| Inaguma, 2016               | +                             | +                         | +                                       | +                             | +                           | /                                            |
| Isoyama, 2014               | /                             | /                         | +                                       | /                             | +                           | /                                            |
| Jassal, 2016                | /                             | /                         | /                                       | /                             | +                           | /                                            |
| Jhamb, 2009                 | /                             | /                         | +                                       | /                             | +                           | -                                            |
| Jhamb, 2011                 | /                             | -                         | +                                       | +                             | +                           | -                                            |
| Johansen, 2007              | /                             | +                         | /                                       | +                             | +                           | +                                            |

|                       |   |   |   |   |   |   |
|-----------------------|---|---|---|---|---|---|
| Johansen, 2016        | / | + | + | + | + | + |
| Joly, 2003            | + | + | - | + | + | + |
| Jones, 1991           | / | + | + | / | + | - |
| Kang, 2013            | + | / | / | - | / | / |
| Knight, 2003          | / | / | / | / | + | - |
| Kohl, 2012            | / | - | - | - | / | - |
| Koyama, 2010          | / | + | / | + | + | - |
| Kutner, 1994          | + | / | / | + | + | - |
| Kutner, 2015          | / | / | / | + | + | - |
| Lacson, 2010          | / | + | / | / | + | + |
| Lowrie, 2003          | / | + | + | / | + | + |
| Mapes, 2003           | / | + | / | - | + | / |
| McAdams-DeMarco, 2013 | + | + | + | + | + | - |
| McAdams-DeMarco, 2015 | / | - | + | + | / | / |
| McClellan, 1991       | - | - | / | - | / | - |
| McClellan, 1992       | + | + | / | + | / | / |
| Meulendijks, 2015     | / | + | - | / | - | + |
| Noori, 2010           | / | + | + | - | + | / |
| de Oliveira, 2016     | / | + | / | / | / | - |
| Peng, 2010            | + | + | + | + | + | + |
| Peng, 2013            | / | / | + | / | + | / |
| Pereira, 2015         | + | + | - | - | + | / |
| Pugh, 2016            | + | + | + | / | + | / |
| Ren, 2016             | + | + | - | - | - | - |
| Ritchie, 2014         | + | + | / | + | + | + |
| Robinson-Cohen, 2014  | - | + | + | + | + | + |
| Roshanravan, 2012     | / | + | / | / | + | / |
| Roshanravan, 2013     | - | / | / | / | + | + |

|                          |   |   |   |   |   |   |
|--------------------------|---|---|---|---|---|---|
| Santos, 2012             | + | + | + | + | + | / |
| Shavit, 2014             | / | / | / | - | / | - |
| Shum, 2014               | + | + | - | + | / | - |
| Sood, 2011               | + | + | / | + | / | - |
| Takaki, 2005             | / | / | / | - | + | / |
| Tentori, 2010            | + | / | / | / | + | / |
| Torino, 2014             | - | / | / | + | + | / |
| Turkmen, 2014            | / | - | - | - | / | - |
| Utas, 2001               | - | / | - | - | / | - |
| Yazawa, 2016             | + | + | - | + | + | + |
| Bao, 2012                | + | + | / | + | + | + |
| de Goeij, 2014           | / | - | - | + | + | - |
| Hatakeyama, 2013         | + | + | / | + | / | - |
| Kutner, 1997             | - | + | - | - | - | - |
| Lopes, 2014              | - | / | / | / | + | - |
| Mansur, 2015             | / | + | - | - | / | - |
| Matos, 2014              | / | + | / | + | + | / |
| Matsuzawa, 2014          | + | / | + | / | + | + |
| Roberts, 1976            | - | / | - | / | / | - |
| Stenvinkel, 2002         | - | / | / | + | / | / |
| Vogt, 2016               | / | / | + | + | + | / |
| Wang, 2010               | - | / | + | + | + | - |
| Wang, 2005               | + | / | / | / | / | - |
| Ali, 2018                | - | / | - | - | / | / |
| Androga, 2017            | / | / | + | / | + | / |
| Bancu, 2017              | / | / | - | - | / | - |
| Dai, 2017                | - | / | / | - | + | + |
| Fukuma, 2017             | / | / | + | / | / | / |
| Giglio, 2018             | / | / | / | / | / | / |
| Jin, 2017                | / | + | / | + | / | - |
| Kang, 2017 <sup>54</sup> | + | / | / | / | / | / |



|                               |   |   |   |   |   |   |
|-------------------------------|---|---|---|---|---|---|
| Kang, 2017 <sup>55</sup>      | + | / | / | / | + | + |
| Kim, 2017                     | + | / | / | / | + | / |
| Kittiskulnam, 2017            | + | + | / | / | / | + |
| Lee, 2017 <sup>69</sup>       | + | / | / | / | - | / |
| Lee, 2017 <sup>70</sup>       | + | / | / | / | / | / |
| Ng, 2016                      | / | / | - | / | + | + |
| Plantinga, 2017               | - | + | - | + | / | + |
| Rymarz, 2018                  | / | / | - | / | - | / |
| Shah, 2018                    | - | + | - | + | + | - |
| Shi, 2017                     | - | / | + | - | / | + |
| Shimoda, 2018                 | - | + | - | + | + | / |
| Tsai, 2017                    | / | / | / | / | + | / |
| van Loon, 2017 <sup>126</sup> | / | - | + | + | - | + |
| van Loon, 2017 <sup>127</sup> | / | + | + | + | + | / |
| Yadla, 2017                   | + | / | + | - | / | / |
| Beddhu, 2009                  | + | + | + | + | + | / |
| Navaneethan, 2014             | + | + | + | + | + | + |
| Brar, 2019                    | / | - | / | + | + | + |
| Brito, 2020                   | - | + | + | + | / | + |
| Chan, 2020                    | / | - | - | + | + | / |
| Chao, 2020                    | - | - | - | + | / | - |
| Clarke, 2019                  | + | + | + | + | + | + |
| Ducharlet, 2019               | - | - | / | + | / | - |
| Goto, 2019                    | - | + | + | / | / | / |
| Gregg, 2019                   | - | + | - | / | + | - |
| Hall, 2019                    | / | + | / | + | + | + |
| Jafari, 2020                  | + | / | / | / | - | - |
| Jegatheswaran,<br>2020        | / | + | / | / | / | / |
| Jiang, 2020                   | + | + | / | + | / | + |
| Kalantar, 2019                | - | / | + | + | + | + |

|                         |   |   |   |   |   |   |
|-------------------------|---|---|---|---|---|---|
| Kamijo, 2018            | / | + | / | + | / | - |
| Kruse, 2020             | - | - | / | + | / | / |
| Kuki, 2019              | / | + | + | + | / | - |
| Kurita, 2019            | / | + | + | + | + | + |
| Lee, 2020               | - | - | / | + | / | - |
| Lin, 2020 <sup>72</sup> | + | + | + | + | + | + |
| Lin, 2020 <sup>73</sup> | / | + | + | / | + | / |
| López-Montes, 2020      | + | / | + | + | + | + |
| Matsuzawa, 2019         | / | + | + | + | + | + |
| Mori, 2019              | / | / | + | + | / | + |
| Nixon, 2020             | / | - | / | / | / | + |
| Souweine, 2020          | + | + | + | + | + | + |
| Rampersad, 2021         | - | + | + | + | + | + |
| Song, 2020              | / | - | + | / | + | + |
| Sy, 2019                | + | + | + | + | + | + |
| Tennankore, 2019        | / | + | + | + | + | + |
| Torino, 2019            | + | / | + | + | + | / |
| Valenzuela, 2019        | - | - | - | / | - | - |
| van Loon, 2019          | + | + | + | / | + | / |
| Veza, 2019              | - | - | - | / | - | / |
| Watanabe, 2021          | + | / | / | + | + | + |
| Watson, 2020            | - | + | + | + | + | + |
| Wetmore, 2019           | + | + | - | / | + | + |
| Xu, 2020                | / | + | + | + | + | + |
| Yamamoto, 2021          | / | - | / | + | + | + |
| Zhang, 2020             | / | - | / | / | / | / |

+: Low risk of bias

/: Moderate risk of bias

-: High risk of bias
